# Supplementary material for: Enantioselective reduction of azaarene-based ketones via visible light-driven photoredox asymmetric catalysis
Source: Royal Society of Chemistry journal article supplement (doi:10.1039/c9cc03661j), 2019-01-01
Supplement: c9cc03661j1.pdf [file c9cc03661j1.pdf]

# Supporting Information

## **Enantioselective reduction of azaarene-based ketones via visible light-driven photoredox asymmetric catalysis**

Baokun Qiao,<sup>a</sup> Chunyang Li,<sup>a</sup> Xiaowei Zhao,<sup>a</sup> Yanli Yin,<sup>a,c</sup> and Zhiyong Jiang<sup>\*,a,b</sup>

*<sup>a</sup>Key Laboratory of Natural Medicine and Immuno-Engineering of Henan Province, School of Chemistry and Chemical Engineering, Henan University, Kaifeng, Henan, P. R. China 475004*

*<sup>b</sup>School of Chemistry and Chemical Engineering, Henan Normal University, Xinxiang, Henan, P. R. China 453007*

*<sup>c</sup>College of Bioengineering, Henan University of Technology, Zhengzhou, Henan, 450001, P. R. China*

E-mail: [chmjzy@henu.edu.cn](mailto:chmjzy@henu.edu.cn)

## Table of Contents

|                                                 |                |
|-------------------------------------------------|----------------|
| 1. General information                          | <b>S2–S3</b>   |
| 2. Optimization of reaction conditions          | <b>S4–S7</b>   |
| 3. General experimental procedures              | <b>S8–S10</b>  |
| 4. Mechanism studies                            | <b>S11–S17</b> |
| 5. Determination of the absolute configurations | <b>S18–S19</b> |
| 6. Characterization of adducts                  | <b>S20–S53</b> |
| 7. Copies of NMR spectra                        | <b>S54–S91</b> |
| 8. References                                   | <b>S92</b>     |

## 1. General information

### General procedures and methods

Experiments involving moisture and/or air sensitive components were performed under a positive pressure of argon in oven-dried glassware equipped with a rubber septum inlet. Dried solvents and liquid reagents were transferred by oven-dried syringes or hypodermic syringe cooled to ambient temperature in a desiccator. Reaction mixtures were stirred in 10 mL sample vial with Teflon-coated magnetic stirring bars unless otherwise stated. Moisture in non-volatile reagents/compounds was removed in high *vacuo* by means of an oil pump and subsequent purging with nitrogen. Solvents were removed *in vacuo* under ~30 mmHg and heated with a water bath at 30–35 °C using rotary evaporator with aspirator. The condenser was cooled with running water at 0 °C.

All experiments were monitored by analytical thin layer chromatography (TLC). TLC was performed on pre-coated plates, 60 F<sub>254</sub>. After elution, plate was visualized under UV illumination at 254 nm for UV active material. Further visualization was achieved by staining Ce(SO<sub>4</sub>)<sub>2</sub> and phosphomolybdic acid solution. For those using the aqueous stains, the TLC plates were heated on a hot plate.

Columns for flash chromatography (FC) contained basified *silica gel* (with Et<sub>3</sub>N) 200–300 mesh. Columns were packed as slurry of basified *silica gel* in petroleum ether and equilibrated solution using the appropriate solvent system. The elution was assisted by applying pressure of about 2 atm with an air pump.

### Instrumentations

Proton nuclear magnetic resonance (<sup>1</sup>H NMR) and carbon NMR (<sup>13</sup>C NMR) were recorded in CDCl<sub>3</sub> otherwise stated. Chemical shifts are reported in parts per million (ppm), using the residual solvent signal as an internal standard: CDCl<sub>3</sub> (<sup>1</sup>H NMR: δ 7.26, singlet; <sup>13</sup>C NMR: δ 77.0, triplet). Multiplicities were given as: *s* (singlet), *d* (doublet), *t* (triplet), *q* (quartet), *quintet*, *m* (multiplets), *dd* (doublet of doublets), *dt* (doublet of triplets), and *br* (broad). Coupling constants (*J*) were recorded in Hertz (Hz). The number of proton atoms (*n*) for a given resonance was indicated by *n*H. The number of carbon atoms (*n*) for a given resonance was indicated by *n*C. HRMS (Analyzer: TOF) was reported in units of mass of charge ratio (*m/z*). Mass samples were dissolved in CH<sub>3</sub>CN (HPLC Grade) unless otherwise stated. Optical rotations were recorded on a polarimeter with a sodium lamp of wavelength 589 nm and reported as follows;  $[\alpha]_{\lambda}^{T^{\circ}C}$  (*c* = g/100 mL, solvent). Melting points were determined on a melting point apparatus.

Enantiomeric excesses were determined by chiral High Performance Liquid Chromatography (HPLC) analysis. UV detection was monitored at 254 nm and 210 nm at the same time. HPLC samples were dissolved in HPLC grade isopropanol (IPA) unless otherwise stated.

## **Materials**

All commercial reagents were purchased with the highest purity grade. The syntheses of material **1**<sup>1</sup> has been previously reported. They were used without further purification unless specified. All solvents used, mainly petroleum ether (PE) and ethyl acetate (EtOAc) were distilled. Anhydrous dichloromethane (DCM) was freshly distilled from CaH<sub>2</sub> and stored under N<sub>2</sub> atmosphere. Toluene, CPME and its derivatives were freshly distilled from sodium/benzophenone before use. All compounds synthesized were stored in a 0 °C freezer and light-sensitive compounds were protected with aluminium foil.

## 2. Optimization of reaction conditions

Table S1. Screening of the chiral organocatalyst (COC)<sup>a</sup>

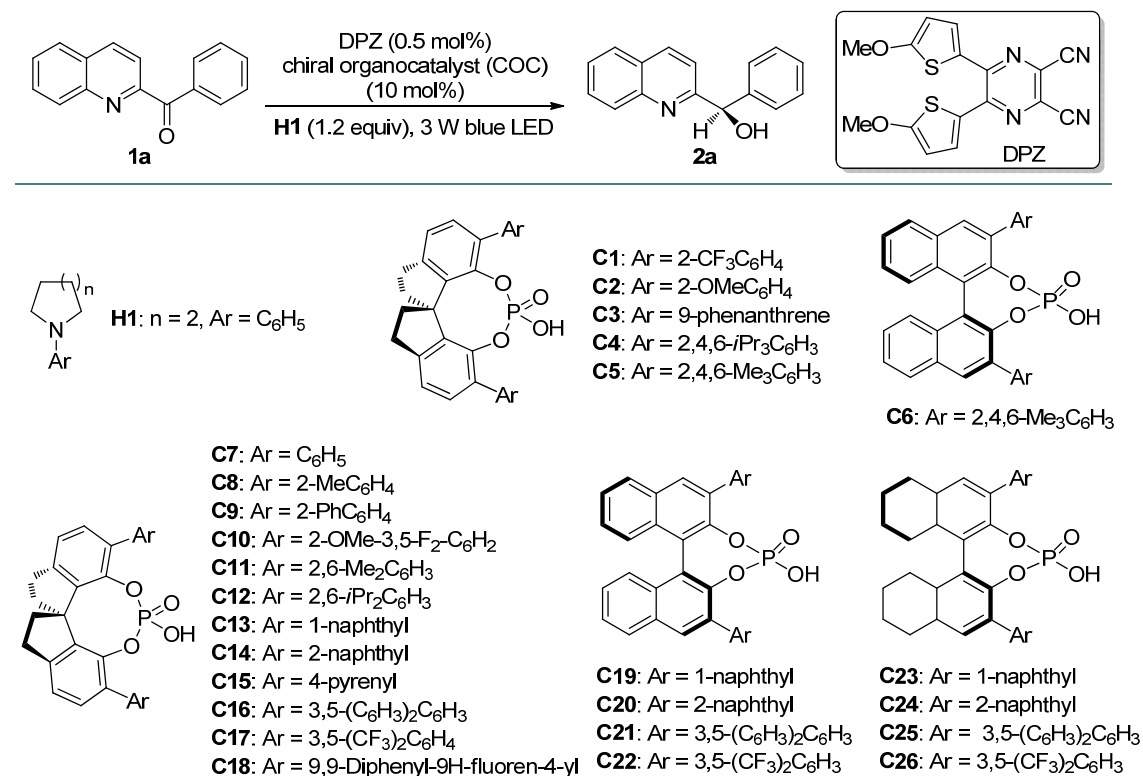

| Entry | COC        | Conv. (%) <sup>b</sup> | ee (%) <sup>c</sup> |
|-------|------------|------------------------|---------------------|
| 1     | --         | middle                 | 0                   |
| 2     | <b>C2</b>  | good                   | 14                  |
| 3     | <b>C3</b>  | excellent              | 7                   |
| 4     | <b>C4</b>  | excellent              | -49                 |
| 5     | <b>C5</b>  | excellent              | 60                  |
| 6     | <b>C6</b>  | excellent              | 44                  |
| 7     | <b>C7</b>  | excellent              | 24                  |
| 8     | <b>C8</b>  | excellent              | 68                  |
| 9     | <b>C9</b>  | excellent              | 69                  |
| 10    | <b>C10</b> | excellent              | 8                   |
| 11    | <b>C11</b> | good                   | 25                  |
| 12    | <b>C12</b> | middle                 | -49                 |
| 13    | <b>C13</b> | excellent              | 41                  |
| 14    | <b>C14</b> | excellent              | 25                  |
| 15    | <b>C15</b> | excellent              | 8                   |
| 16    | <b>C16</b> | excellent              | 20                  |
| 17    | <b>C17</b> | excellent              | 20                  |
| 18    | <b>C17</b> | excellent              | 35                  |
| 19    | <b>C19</b> | good                   | 36                  |
| 20    | <b>C29</b> | excellent              | 23                  |
| 21    | <b>C21</b> | excellent              | 12                  |

|    |            |           |     |
|----|------------|-----------|-----|
| 22 | <b>C22</b> | excellent | 14  |
| 23 | <b>C23</b> | good      | -35 |
| 24 | <b>C24</b> | excellent | -13 |
| 25 | <b>C25</b> | excellent | -14 |
| 26 | <b>C26</b> | excellent | -12 |
| 27 | <b>C27</b> | excellent | 74  |

<sup>a</sup>Reaction conditions: **1a** (0.05 mmol), **H** (0.06 mmol) in diethyl ether (1.0 mL) at 25 °C for 12 h.

<sup>b</sup>Determined by TLC analysis: “excellent” for Conv.  $\geq$  90%, “good” for 90% > Conv.  $\geq$  70%, “middle” for 70% > Conv.  $\geq$  40%, “low” for Conv. < 40%. <sup>c</sup>Determined by HPLC analysis on a chiral stationary phase.

**Table S2. Screening of the solvent<sup>a</sup>**

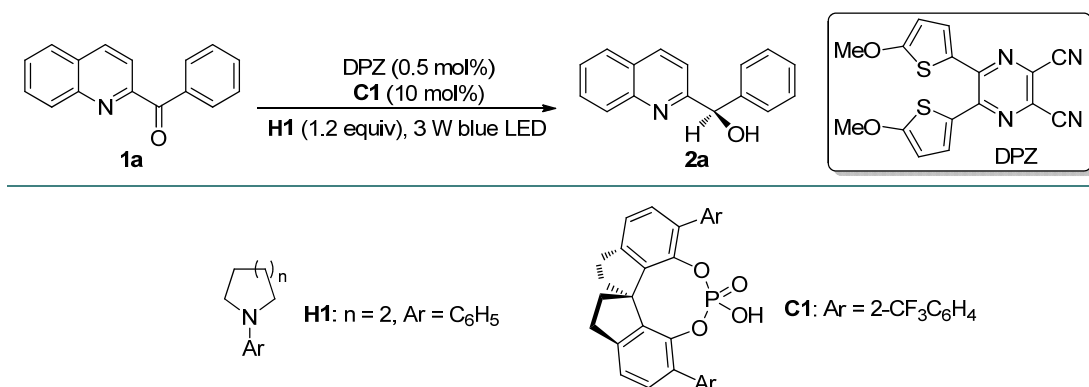

| Entry | Solvent                         | Conv. (%) <sup>b</sup> | ee (%) <sup>c</sup> |
|-------|---------------------------------|------------------------|---------------------|
| 1     | Toluene                         | good                   | 11                  |
| 2     | CHCl <sub>3</sub>               | 0                      | N.P.                |
| 3     | CH <sub>2</sub> Cl <sub>2</sub> | low                    | 11                  |
| 4     | CH <sub>3</sub> CN              | excellent              | N.D.                |
| 5     | THF                             | excellent              | 74                  |
| 6     | Dioxane                         | good                   | 47                  |
| 7     | DME                             | excellent              | 76                  |
| 8     | Anisole                         | good                   | 56                  |
| 9     | <i>n</i> Bu <sub>2</sub> O      | good                   | 64                  |
| 10    | <i>i</i> Pr <sub>2</sub> O      | good                   | 66                  |
| 11    | CPME                            | excellent              | 79                  |
| 12    | MTBE                            | excellent              | 78                  |

<sup>a</sup>Reaction conditions: **1a** (0.05 mmol), **H** (0.06 mmol) in 1.0 mL solvent at 25 °C for 12 h. <sup>b</sup>

Determined by TLC analysis: “excellent” for Conv.  $\geq$  90%, “good” for 90% > Conv.  $\geq$  70%, “middle” for 70% > Conv.  $\geq$  40%, “low” for Conv. < 40%. <sup>c</sup>Determined by HPLC analysis on a chiral stationary phase. N.D. = not determined. N.P. = no product.

**Table S3. Screening of the reductant<sup>a</sup>**

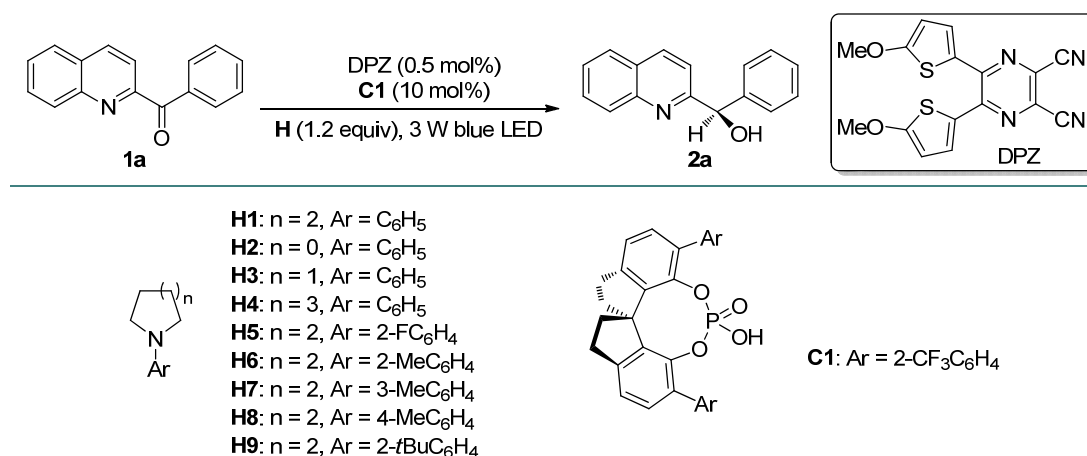

| entry | H (1.2 equiv)     | Conv. (%) <sup>b</sup> | ee (%) <sup>c</sup> |
|-------|-------------------|------------------------|---------------------|
| 1     | Et <sub>3</sub> N | low                    | 64                  |
| 2     | DIPEA             | middle                 | 68                  |
| 3     | HZE               | excellent              | 40                  |
| 4     | <b>H2</b>         | excellent              | 55                  |
| 5     | <b>H3</b>         | excellent              | 74                  |
| 6     | <b>H4</b>         | excellent              | 69                  |
| 7     | <b>H5</b>         | excellent              | 79                  |
| 8     | <b>H6</b>         | excellent              | 78                  |
| 9     | <b>H7</b>         | excellent              | 73                  |
| 10    | <b>H8</b>         | excellent              | 70                  |
| 11    | <b>H9</b>         | excellent              | 78                  |

<sup>a</sup>Reaction conditions: **1a** (0.05 mmol), **H** (0.06 mmol) in 1.0 mL CPME at 25 °C for 12 h. <sup>b</sup>Determined by TLC analysis: “excellent” for Conv. ≥ 90%, “good” for 90% > Conv. ≥ 70%, “middle” for 70% > Conv. ≥ 40%, “low” for Conv. < 40%. <sup>c</sup>Determined by HPLC analysis on a chiral stationary phase.

**Table S4. Screening of the amount of DPZ, Molecular Sieve, and temperature<sup>a</sup>**

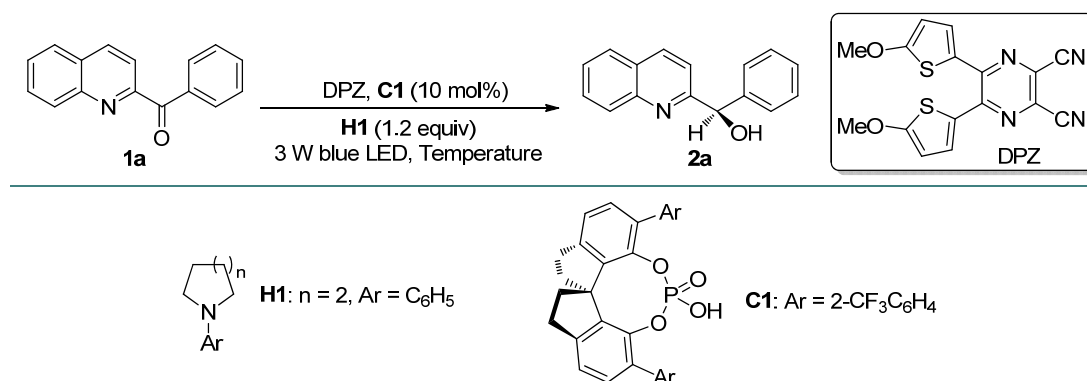

| entry | PC (mol%) | Molecular Sieve (25 mg) | Conv. (%) <sup>b</sup> | <i>T</i> (°C) | ee (%) <sup>c</sup> |
|-------|-----------|-------------------------|------------------------|---------------|---------------------|
| 1     | DPZ (0.5) | --                      | excellent              | 10            | 82                  |
| 2     | DPZ (0.5) | --                      | good                   | 0             | 83                  |
| 3     | DPZ (0.5) | --                      | good                   | -10           | 86                  |
| 4     | DPZ (0.5) | --                      | middle                 | -20           | 88                  |
| 5     | DPZ (0.5) | --                      | middle                 | -40           | 89                  |
| 6     | DPZ (0.5) | 3 Å                     | good (93) <sup>d</sup> | -40           | 91                  |
| 7     | DPZ (0.5) | 4 Å                     | middle                 | -40           | 90                  |
| 8     | DPZ (0.5) | 5 Å                     | middle                 | -40           | 88                  |
| 9     | DPZ (1.0) | 3 Å                     | good                   | -40           | 89                  |
| 10    | DPZ (0.2) | 3 Å                     | middle                 | -40           | 91                  |
| 11    | DPZ (0.1) | 3 Å                     | low                    | -40           | 91                  |

<sup>a</sup>Reaction conditions: **1a** (0.05 mmol), **H** (0.06 mmol) in 1.0 mL CPME for 48 h. <sup>b</sup>Determined by TLC analysis: “excellent” for Conv. ≥ 90%, “good” for 90% > Conv. ≥ 70%, “middle” for 70% > Conv. ≥ 40%, “low” for Conv. < 40%. <sup>c</sup>Determined by HPLC analysis on a chiral stationary phase. <sup>d</sup>0.10 mmol scale for 72 h, isolated yield based on the **1a**. N.P. = no product.



### 3. General experimental procedures

#### Reaction set-up

10 mL Schlenk tube is placed at the center of a stir plate. A 3 W blue LED lamp (HW-450-455LED-3W) is placed to one sidewall of reaction tube (at approximately 2 cm away from the light source). The transformations were conducted in a cryostat which allows a stable and certain temperature.

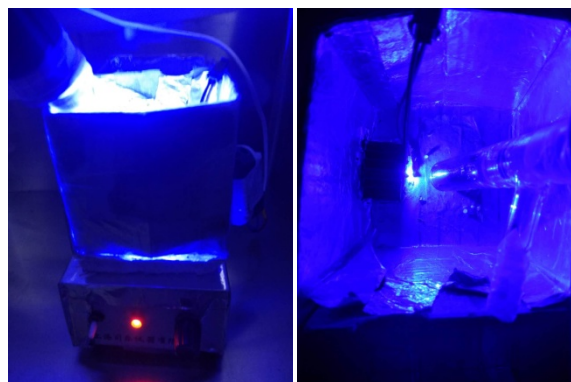

Side view

Top View

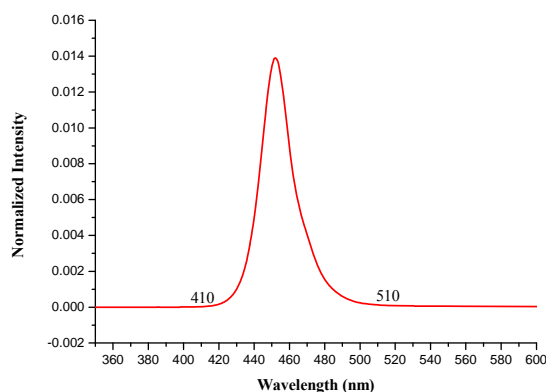

Emission spectrum of the 3 W LED light.

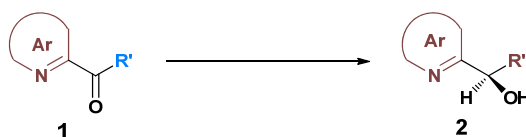

**For the preparation of 2a-zc:** To a flame dried Schlenk tube was sequentially added **1a-zc** (0.10 mmol, 1.0 equiv), DPZ (0.0005 mmol, 0.005 equiv), **C1** (0.01 mmol, 0.1 equiv), **H1** (0.12 mmol, 1.2 equiv), 3 Å MS (50 mg), and degassed CPME (2.0 mL). Then degassed three times by freeze-pump-thaw method. The reaction mixture was stirred under an argon atmosphere at  $-40\text{ }^{\circ}\text{C}$  (the temperature was maintained in an incubator) for 30 min without light, then irradiated by a 3 W blue LED for another 72 h. The reaction was monitored by TLC. After completion of the reaction, the reaction mixture was directly loaded onto a short

*silica gel* column, followed by gradient elution with petroleum ether/ethyl acetate (20/1 to 4/1 ratio). Removing the solvent in *vacuo*, afforded products **2a–zc**.

**For the preparation of 2zd:** To a flame dried Schlenk tube was sequentially added **1zd** (0.10 mmol, 1.0 equiv), DPZ (0.0005 mmol, 0.005 equiv), **C1** (0.01 mmol, 0.1 equiv), **H1** (0.12 mmol, 1.2 equiv), 3 Å MS (50 mg), and degassed CPME (2.0 mL). Then degassed three times by freeze-pump-thaw method. The reaction mixture was stirred under an argon atmosphere at 25 °C with the irradiation by a 3 W blue LED for 24 h. The reaction was monitored by TLC. After completion of the reaction, the crude mixture was directly loaded onto a short *silica gel* column, followed by gradient elution with petroleum ether/ethyl acetate (50/1 to 10/1 ratio). Removing the solvent in *vacuo*, afforded product **2zd**.

**For the preparation of 2ze and 2zg:** To a flame dried Schlenk tube was sequentially added **1ze/1zg** (0.10 mmol, 1.0 equiv), DPZ (0.0005 mmol, 0.005 equiv), **C18/C26** (0.01 mmol, 0.1 equiv), **H1** (0.12 mmol, 1.2 equiv), 3 Å MS (50 mg), and degassed CPME (2.0 mL). Then degassed three times by freeze-pump-thaw method. The reaction mixture was stirred under an argon atmosphere at –40 °C (the temperature was maintained in an incubator) for 30 min without light, then irradiated by a 3 W blue LED for another 72 h. The reaction was monitored by TLC. After completion of the reaction, the reaction mixture was directly loaded onto a short *silica gel* column, followed by gradient elution with petroleum ether/ethyl acetate (50/1 to 10/1 ratio). Removing the solvent in *vacuo*, afforded product **2ze/2zg**.

**For the preparation of 2zf:** To a flame dried Schlenk tube was sequentially added **1zf** (0.10 mmol, 1.0 equiv), DPZ (0.0005 mmol, 0.005 equiv), **C3** (0.01 mmol, 0.1 equiv), **H1** (0.12 mmol, 1.2 equiv), and degassed CPME (2.0 mL). Then degassed three times by freeze-pump-thaw method. The reaction mixture was stirred under an argon atmosphere at 25 °C with the irradiation by a blue 3 W LED for 24 h. The reaction was monitored by TLC. After completion of the reaction, the crude mixture was directly loaded onto a short *silica gel* column, followed by gradient elution with petroleum ether/ethyl acetate (50/1 to 12/1 ratio). Removing the solvent in *vacuo*, afforded product **2zf**.

**For the preparation of 2zj-l:** To a flame dried Schlenk tube was sequentially added **1zj-l** (0.10 mmol, 1.0 equiv), DPZ (0.0005 mmol, 0.005 equiv), **C2** (0.01 mmol, 0.1 equiv), **H1** (0.12 mmol, 1.2 equiv), and degassed CPME (2.0 mL). Then degassed three times by freeze-pump-thaw method. The reaction mixture was stirred under an argon atmosphere at 25 °C with the irradiation by a 3 W blue LED for 15 h. The reaction was monitored by TLC. After

completion of the reaction, the crude mixture was directly loaded onto a short *silica gel* column, followed by gradient elution with petroleum ether/ethyl acetate (30/1 to 5/1 ratio). Removing the solvent in *vacuo*, afforded products **2zj-1**.

We also explored the reduction of phenyl(pyridin-2-yl)methanol with modified reaction conditions.

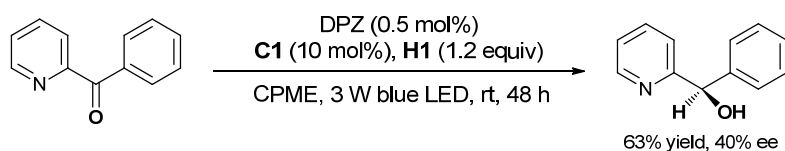

The procedures in detail are as follows:

To a flame dried Schlenk tube was sequentially added phenyl(pyridin-2-yl)methanone (0.10 mmol, 1.0 equiv), DPZ (0.0005 mmol, 0.005 equiv), **C1** (0.01 mmol, 0.1 equiv), **H1** (0.12 mmol, 1.2 equiv), and degassed CPME (2.0 mL). Then degassed three times by freeze-pump-thaw method. The reaction mixture was stirred under an argon atmosphere at 25 °C with the irradiation by a 3 W blue LED for 48 h. The reaction was monitored by TLC. After completion of the reaction, the crude mixture was directly loaded onto a short *silica gel* column, followed by gradient elution with petroleum ether/ethyl acetate (20/1 to 4/1 ratio). Removing the solvent in *vacuo*, afforded product phenyl(pyridin-2-yl)methanol in 63% yield with 40% ee.

#### 4. Mechanism studies

##### Emission quenching experiments

Excitation spectrum was recorded on an EDINBURGH FLS 980 fluorescence spectrophotometer equipped with a monochromated 325 W Xe-arc excitation source and a visible detector (Hamamatsu R928P). DPZ solution was excited at 448 nm and the emission intensity at 544 nm was observed. A solution of DPZ ( $2.5 \times 10^{-4}$  M) in MeCN was added to the appropriate amount of quencher in 5.0 mL volumetric flask under  $N_2$ . The solution was transferred to a 1.5 mL quartz cell and the emission spectrum of the sample was collected.

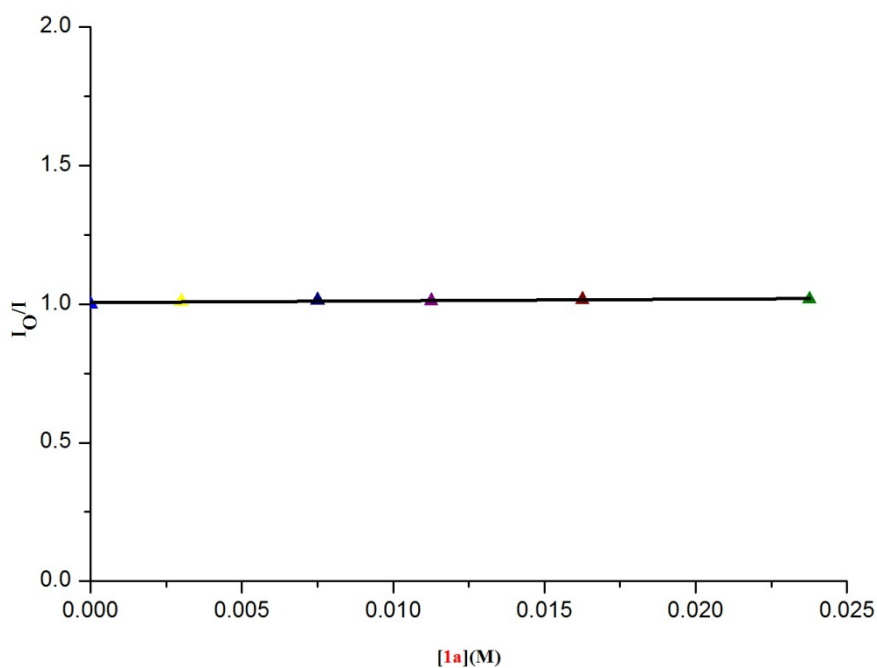

**Fig. S1.** Stern–Volmer quenching experiment of DPZ and **1a**. (No quenching observed.)

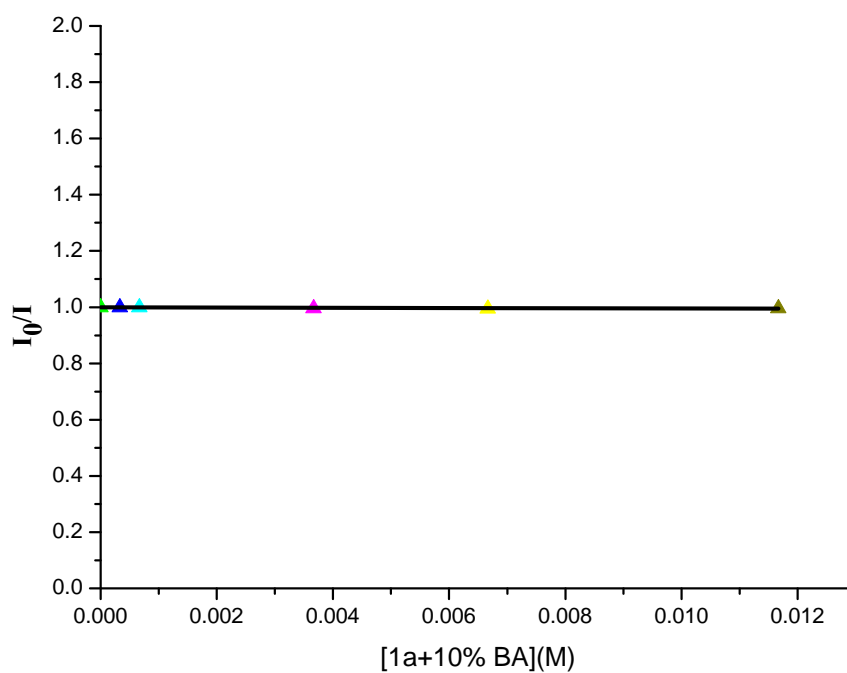

**Fig. S2.** Stern–Volmer quenching experiment of DPZ and [1a+10% ((PhO)<sub>2</sub>P(O)OH)]. (No quenching observed.)

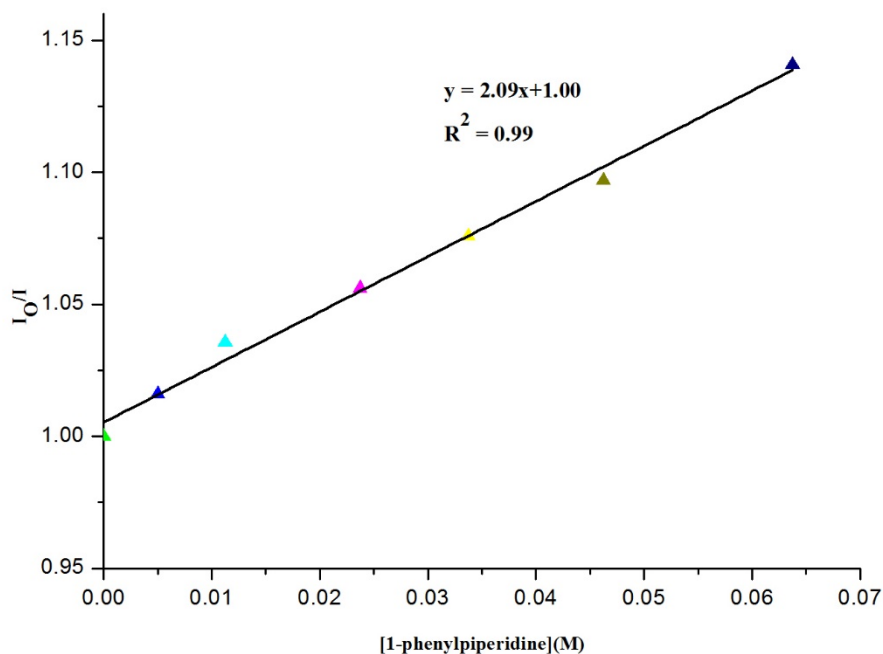

**Fig. S3.** Stern–Volmer quenching experiment of DPZ and H1. (Quenching observed.)

**Electrochemistry.** Cyclic voltammetry experiments were performed on a CHI600E Workstation. Measurements were performed for anhydrous acetonitrile solutions ([sample] =

1.0 mM,  $[(\text{NBu}_4)\text{PF}_6] = 0.10 \text{ M}$ ) with a radium glassy carbon (working electrode) and platinum wire (counter electrode), and a Ag/AgCl reference electrode under  $\text{N}_2$  at room temperature. The scan rate was 50 mV/s. Ferrocene ( $\text{Cp}_2\text{Fe}$ ) was used as a reference.

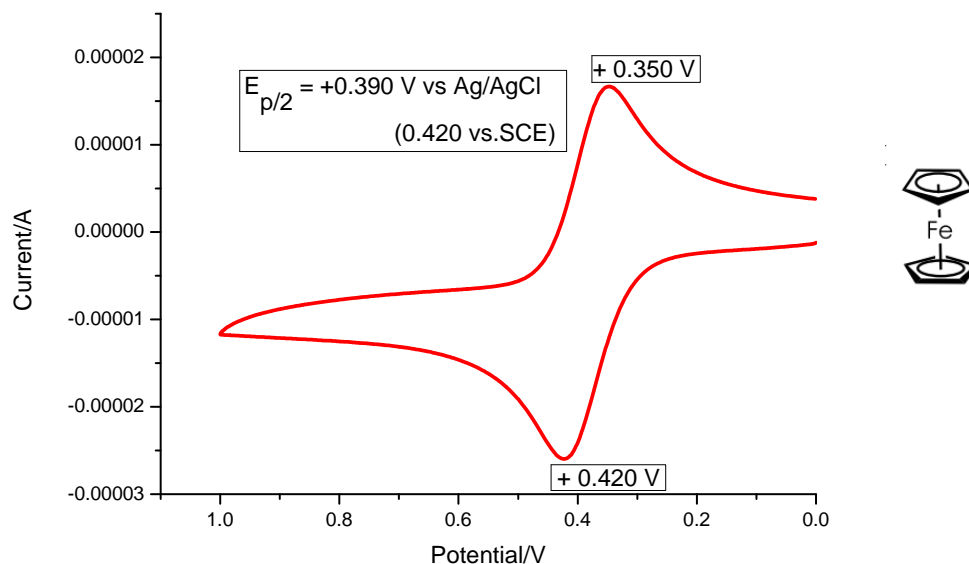

**Fig. S4.** Cyclic voltammogram of Ferrocene.

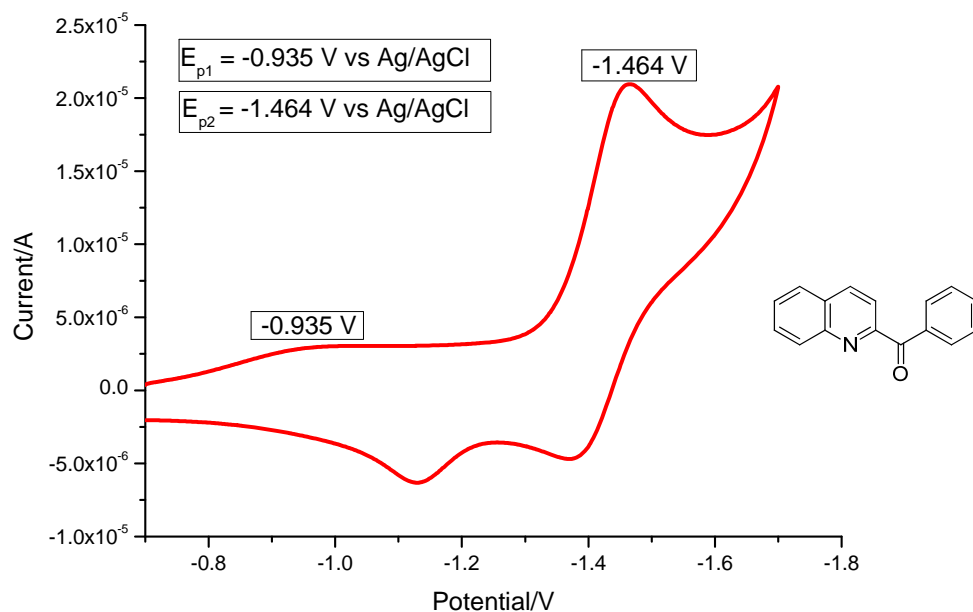

**Fig. S5.** Cyclic voltammogram of **1a**. Ferrocene ( $\text{Cp}_2\text{Fe}$ ) was used as a reference.  $E_{p1} = -0.905 \text{ V}$  versus SCE in  $\text{CH}_3\text{CN}$ ,  $E_{p2} = -1.434 \text{ V}$  versus SCE in  $\text{CH}_3\text{CN}$ .

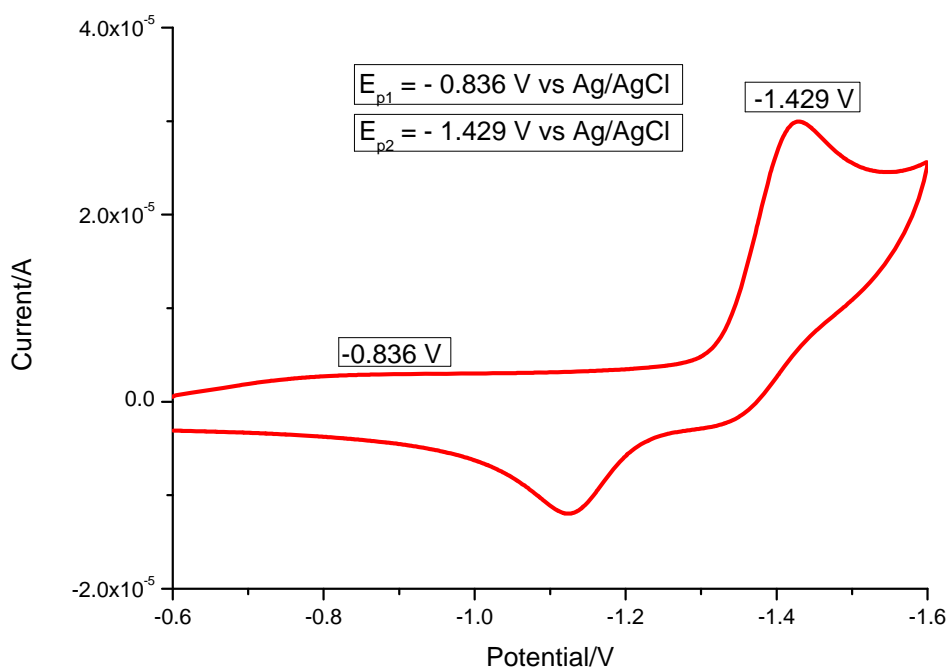

**Fig. S6.** Cyclic voltammogram of [1a + 10% C1]. Scan Rate: 50 mV/s. Ferrocene ( $\text{Cp}_2\text{Fe}$ ) was used as a reference.  $E_{p1} = -0.806$  V versus SCE in  $\text{CH}_3\text{CN}$ ,  $E_{p2} = -1.399$  V versus SCE in  $\text{CH}_3\text{CN}$ .

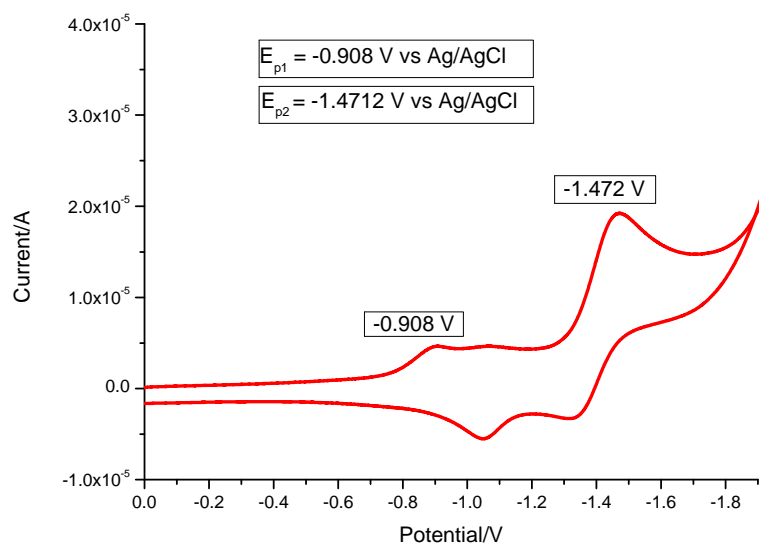

**Fig. S7.** Cyclic voltammogram of [1a + 0.5% DPZ]. Scan Rate: 50 mV/s. Ferrocene ( $\text{Cp}_2\text{Fe}$ ) was used as a reference.  $E_{p1} = -0.878$  V versus SCE in  $\text{CH}_3\text{CN}$ ,  $E_{p2} = -1.442$  V versus SCE in  $\text{CH}_3\text{CN}$ .

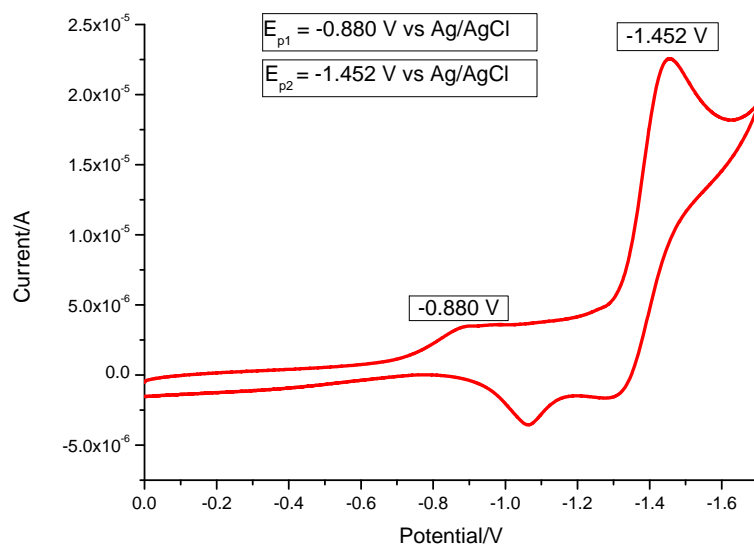

**Fig. S8.** Cyclic voltammogram of [1a + 120% H1]. Scan Rate: 50 mV/s. Ferrocene ( $\text{Cp}_2\text{Fe}$ ) was used as a reference.  $E_{p1} = -0.850$  V versus SCE in  $\text{CH}_3\text{CN}$ ,  $E_{p2} = -1.422$  V versus SCE in  $\text{CH}_3\text{CN}$ .

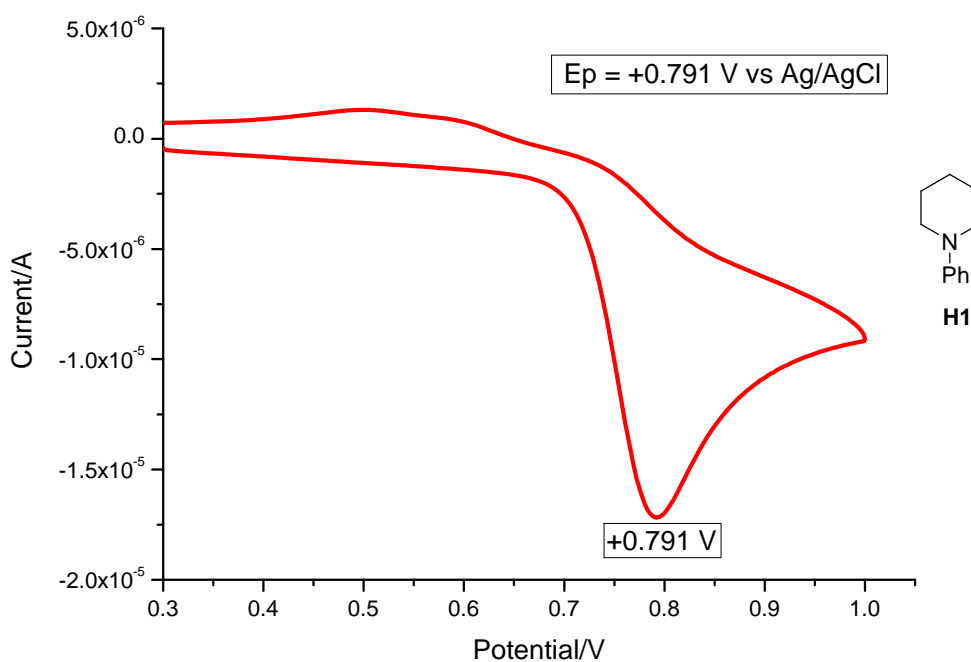

**Fig. S9.** Cyclic voltammogram of H1. Ferrocene ( $\text{Cp}_2\text{Fe}$ ) was used as a reference.  $E_p = +0.821$  V versus SCE in  $\text{CH}_3\text{CN}$ .



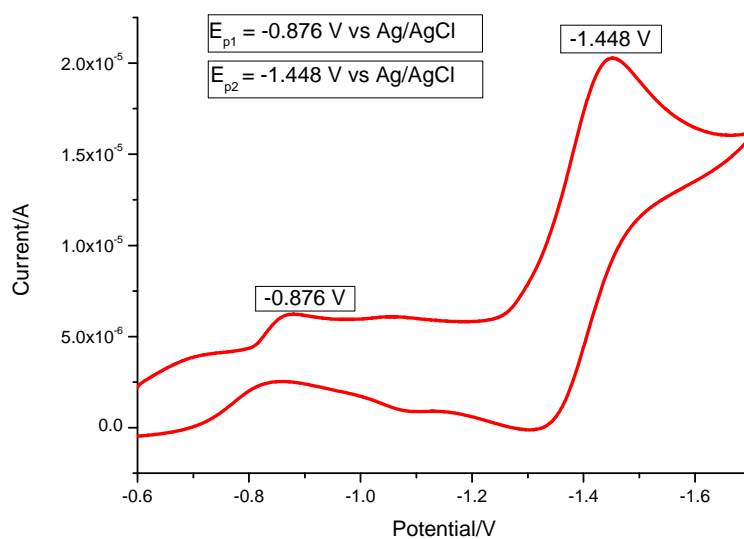

**Fig. S10.** Cyclic voltammogram of [1a + 10% C1 + 120% H1 + 0.5% DPZ]. Scan Rate: 50 mV/s. Ferrocene (Cp<sub>2</sub>Fe) was used as a reference. E<sub>p1</sub> = -0.846 V versus SCE in CH<sub>3</sub>CN, E<sub>p2</sub> = -1.418 V versus SCE in CH<sub>3</sub>CN.

#### Determination of the proton source

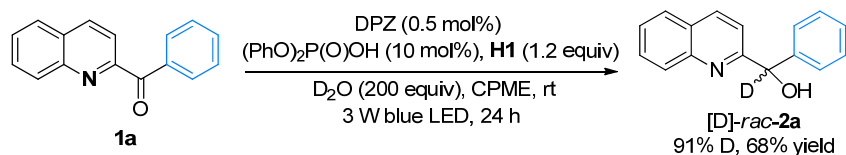

To a flame dried Schlenk tube was sequentially added **1a** (0.10 mmol, 1.0 equiv), DPZ (0.0005 mmol, 0.005 equiv), diphenyl phosphate (0.01 mmol, 0.1 equiv), **H1** (0.12 mmol, 1.2 equiv), D<sub>2</sub>O (20 mmol, 200 equiv) and CPME (2 mL). Then degassed three times by freeze-pump-thaw method. The reaction mixture was irradiated by a 3 W blue LED for 24 hours at rt. The reaction mixture was directly loaded onto a short basified *silica gel* column, followed by gradient elution with petroleum ether/ethyl acetate (20/1 to 4/1 ratio). Removing the solvent in *vacuo*, afforded [D]-*rac*-**2a** in 68% yield with 91% deuterium incorporation. The result suggests the protonation as a feasible process to form the product.

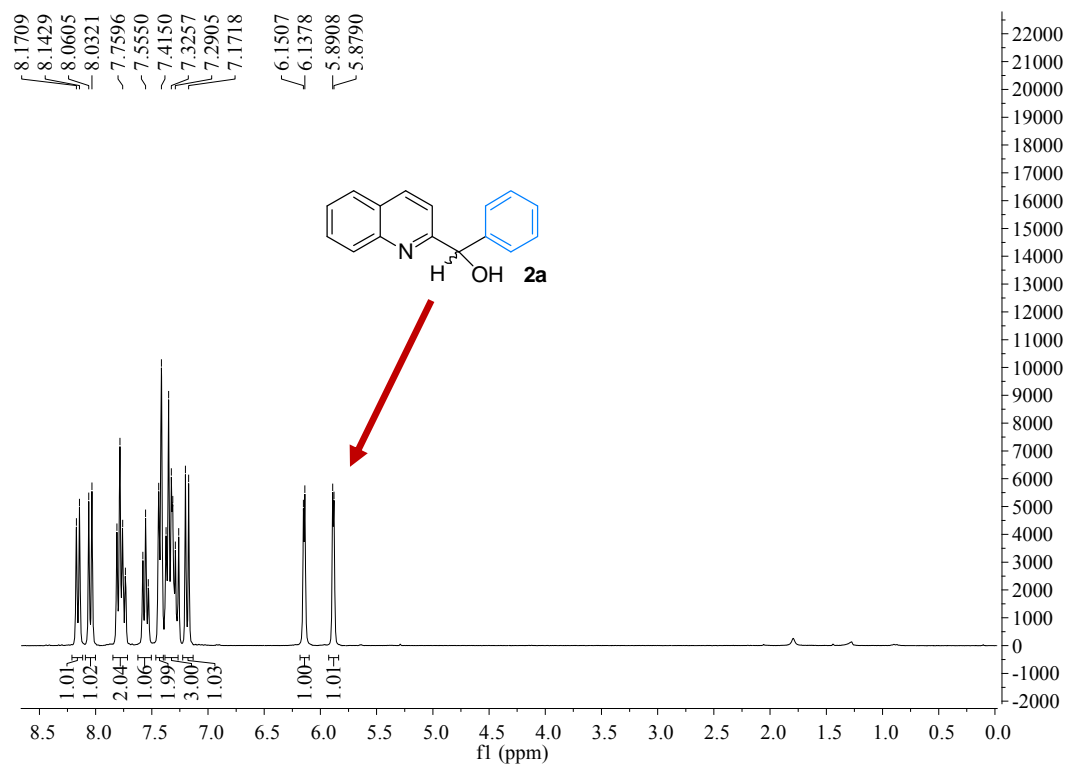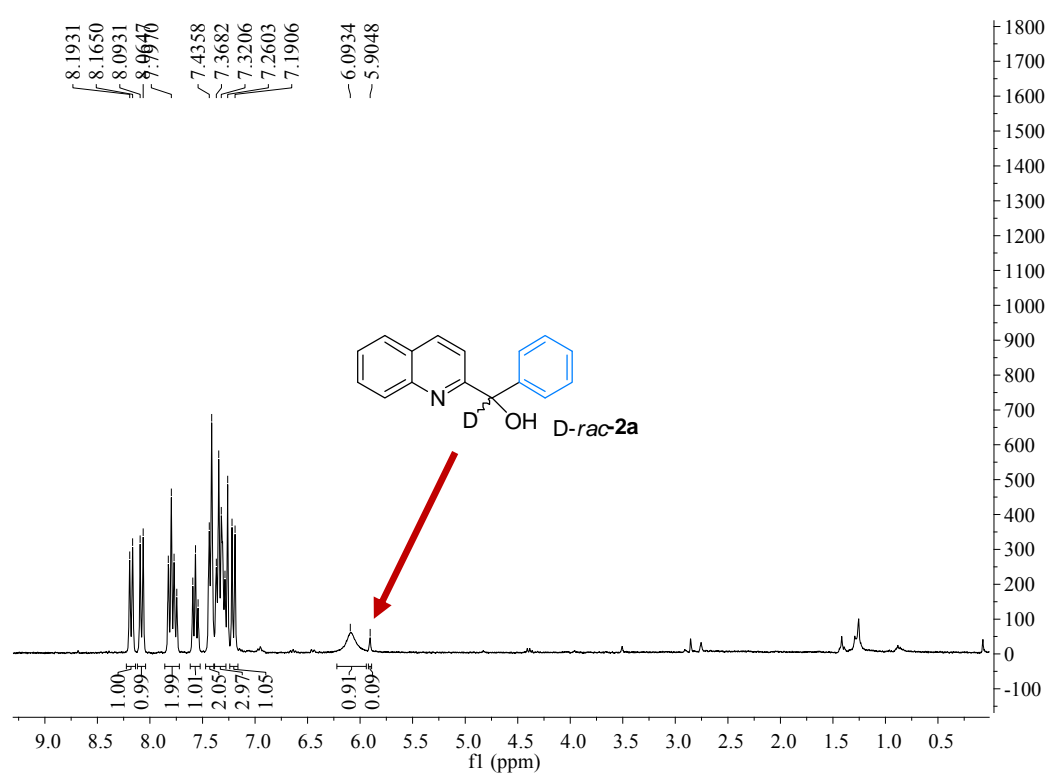

## 5. Determination of the absolute configurations

### Determination of the absolute configurations of **2zj**

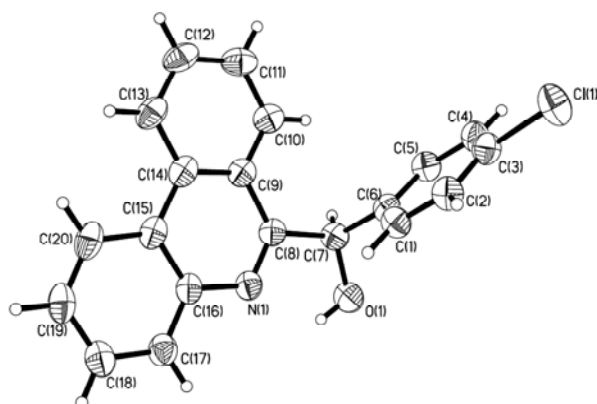

**Fig. S19.** Absolute configuration of **2zj** (CCDC 1920199)  
Displacement ellipsoids are drawn at the 30% probability level.  
(solvent: ethyl acetate:*n*hexane = 1:3)

**Table S6.** Crystal data and structure refinement for **qbk4cl**.

|                                       |                                               |
|---------------------------------------|-----------------------------------------------|
| Identification code                   | <b>qbk4cl</b>                                 |
| Empirical formula                     | C <sub>20</sub> H <sub>14</sub> ClNO          |
| Formula weight                        | 319.77                                        |
| Temperature/K                         | 293(2)                                        |
| Crystal system                        | Orthorhombic                                  |
| Space group                           | P2 <sub>1</sub> 2 <sub>1</sub> 2 <sub>1</sub> |
| <i>a</i> /Å                           | 5.15285(17)                                   |
| <i>b</i> /Å                           | 11.3914(5)                                    |
| <i>c</i> /Å                           | 26.4345(10)                                   |
| $\alpha$ /                            | 90                                            |
| $\beta$ /                             | 90                                            |
| $\gamma$ /                            | 90                                            |
| Volume/Å <sup>3</sup>                 | 1551.66(10)                                   |
| <i>Z</i>                              | 4                                             |
| $\rho_{\text{calc}}$ /cm <sup>3</sup> | 1.369                                         |
| $\mu$ /mm <sup>-1</sup>               | 2.197                                         |

|                                             |                                                              |
|---------------------------------------------|--------------------------------------------------------------|
| F(000)                                      | 664.0                                                        |
| Crystal size/mm <sup>3</sup>                | 0.15 × 0.05 × 0.04                                           |
| Radiation                                   | CuK $\alpha$ ( $\lambda$ = 1.54184)                          |
| 2 $\Theta$ range for data collection/°      | 8.452 to 134.11                                              |
| Index ranges                                | -3 ≤ h ≤ 6, -13 ≤ k ≤ 13, -31 ≤ l ≤ 31                       |
| Reflections collected                       | 10220                                                        |
| Independent reflections                     | 2755 [ $R_{\text{int}}$ 0.0644, $R_{\text{sigma}}$ = 0.0422] |
| Data/restraints/parameters                  | 2755/0/197                                                   |
| Goodness-of-fit on F <sup>2</sup>           | 1.045                                                        |
| Final R indexes [ $I \geq 2\sigma(I)$ ]     | $R_1$ = 0.0669, $wR_2$ = 0.1777                              |
| Final R indexes [all data]                  | $R_1$ = 0.0759, $wR_2$ = 0.1906                              |
| Largest diff. peak/hole / e Å <sup>-3</sup> | 0.33/-0.24                                                   |
| Flack parameter                             | -0.026(17)                                                   |

## Experimental

The crystal was kept at 293(2) K during data collection. Using Olex2, the structure was solved with the ShelXS structure solution program using Direct Methods and refined with the ShelXL refinement package using Least Squares minimisation.

## Crystal structure determination

**Crystal Data** for C<sub>20</sub>H<sub>14</sub>ClNO ( $M$  = 319.77 g/mol): orthorhombic, space group P2<sub>1</sub>2<sub>1</sub>2<sub>1</sub> (no. 19),  $a$  = 5.15285(17) Å,  $b$  = 11.3914(5) Å,  $c$  = 26.4345(10) Å,  $V$  = 1551.66(10) Å<sup>3</sup>,  $Z$  = 4,  $T$  = 293(2) K,  $\mu(\text{CuK}\alpha)$  = 2.197 mm<sup>-1</sup>,  $D_{\text{calc}}$  = 1.369 g/cm<sup>3</sup>, 10220 reflections measured (8.452 ≤ 2 $\Theta$  ≤ 134.11), 2755 unique ( $R_{\text{int}}$  = 0.0644,  $R_{\text{sigma}}$  = 0.0422) which were used in all calculations. The final  $R_1$  was 0.0669 ( $I > 2\sigma(I)$ ) and  $wR_2$  was 0.1906 (all data).

## 6. Characterization of adducts

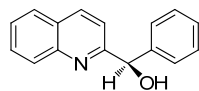

**2a:** white solid, Mp 59.2 – 60.4 °C, 21.9 mg, 93% yield, 92% ee,  $[\alpha]_D^{22}$  – 88.6 (*c* 1.0, CHCl<sub>3</sub>); <sup>1</sup>H NMR (300 MHz, CDCl<sub>3</sub>) δ 8.16 (d, *J* = 8.4 Hz, 1H), 8.05 (d, *J* = 8.5 Hz, 1H), 7.77 (dd, *J* = 14.7, 7.6 Hz, 2H), 7.56 (t, *J* = 7.4 Hz, 1H), 7.43 (d, *J* = 6.9 Hz, 2H), 7.33 (dt, *J* = 8.5, 6.8 Hz, 3H), 7.19 (d, *J* = 8.5 Hz, 1H), 6.14 (d, *J* = 3.9 Hz, 1H), 5.88 (d, *J* = 3.6 Hz, 1H); <sup>13</sup>C NMR (75 MHz, CDCl<sub>3</sub>) δ 160.4, 145.9, 142.7, 137.0, 129.9, 128.8, 128.6, 128.0, 127.6, 127.4, 126.6, 119.2, 75.1; HRMS (ESI) *m/z* 258.0901 (M+Na<sup>+</sup>), calc. for C<sub>16</sub>H<sub>13</sub>NONa 258.0895.

The ee was determined by HPLC analysis: CHIRAL INB (4.6 mm i.d. x 250 mm); Hexane/2-propanol = 90/10; flow rate 1.0 mL/min; 25 °C; 230 nm; retention time: 9.5 min (minor) and 17.8 min (major).

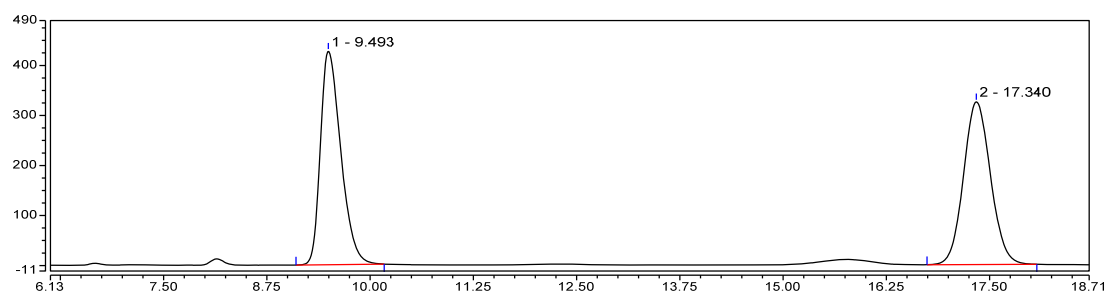

| Entry | Retention Time | Area     | Height | %Area |
|-------|----------------|----------|--------|-------|
| 1     | 9.493          | 122.1204 | 426.96 | 49.74 |
| 2     | 17.340         | 123.3960 | 325.30 | 50.26 |

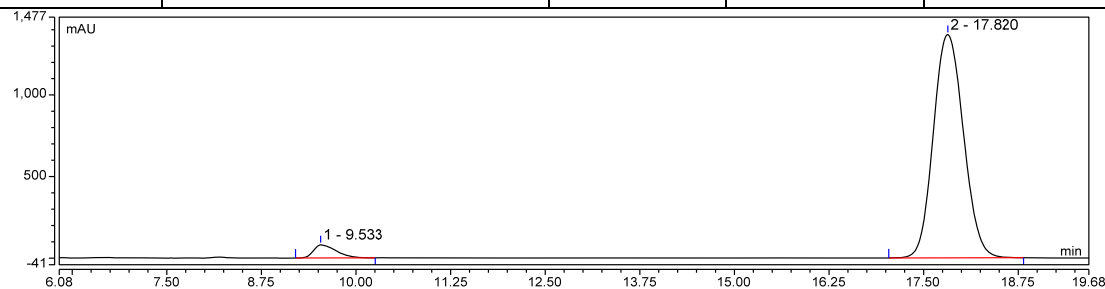

| Entry | Retention Time | Area     | Height  | %Area |
|-------|----------------|----------|---------|-------|
| 1     | 9.533          | 27.8260  | 80.68   | 4.22  |
| 2     | 17.820         | 631.2709 | 1368.70 | 95.78 |

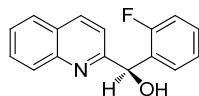

**2b:** colorless oil, 21.8 mg, 86% yield, 90% ee,  $[\alpha]_D^{22}$  – 235.1 (*c* 1.0, CHCl<sub>3</sub>); <sup>1</sup>H NMR (300 MHz, CDCl<sub>3</sub>) δ 8.12 (dd, *J* = 16.6, 8.5 Hz, 2H), 7.78 (dd, *J* = 18.8, 7.8 Hz, 2H), 7.56 (t, *J* = 7.3 Hz, 1H), 7.38 (t, *J* = 7.5 Hz, 1H), 7.31 – 7.23 (m, 2H), 7.09 (t, *J* = 8.4 Hz, 2H), 6.28 (s, 1H), 6.15 (s, 1H); <sup>13</sup>C NMR (75 MHz, CDCl<sub>3</sub>)

$\delta$  160.4 (d,  $J = 246.2$  Hz), 159.7, 145.9, 137.4, 130.0, 129.8,  $\delta$  129.4 (d,  $J = 8.3$  Hz), 128.8 (d,  $J = 4.0$  Hz), 128.7, 127.6, 127.6, 126.7, 124.5 (d,  $J = 3.5$  Hz), 118.9 (d,  $J = 3.1$  Hz), 115.5 (d,  $J = 21.9$  Hz), 68.1 (d,  $J = 4.0$  Hz); HRMS (ESI)  $m/z$  276.0796 ( $M+Na^+$ ), calc. for  $C_{16}H_{12}FNONa$  276.0801.

The ee was determined by HPLC analysis: CHIRAL INB (4.6 mm i.d. x 250 mm); Hexane/2-propanol = 90/10; flow rate 1.0 mL/min; 25 °C; 254 nm; retention time: 8.5 min (minor) and 14.6 min (major).

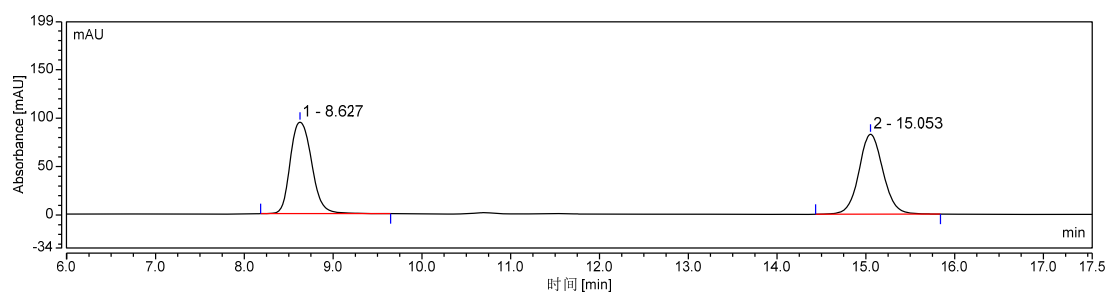

| Entry | Retention Time | Area    | Height | %Area |
|-------|----------------|---------|--------|-------|
| 1     | 8.627          | 26.4423 | 94.36  | 50.40 |
| 2     | 15.053         | 26.0221 | 82.48  | 49.60 |

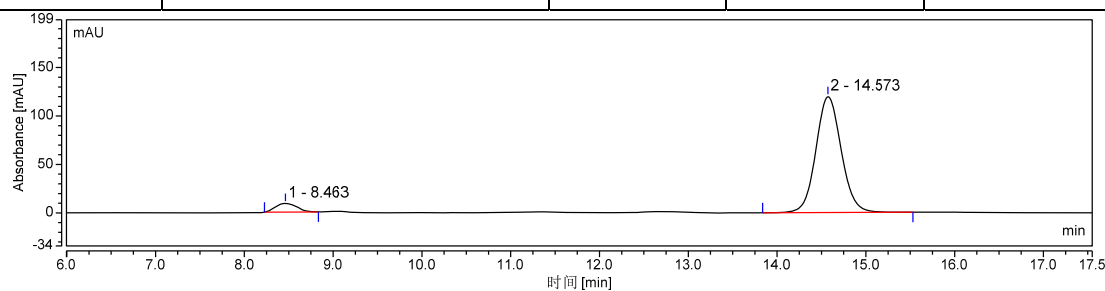

| Entry | Retention Time | Area    | Height | %Area |
|-------|----------------|---------|--------|-------|
| 1     | 8.463          | 2.1477  | 8.22   | 5.15  |
| 2     | 14.573         | 39.5841 | 119.56 | 94.85 |

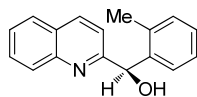

**2c**: white solid, Mp 82.1 – 83.7 °C, 20.2 mg, 81% yield, 97% ee,  $[\alpha]_D^{22} +8.4$  ( $c$  1.0,  $CHCl_3$ );  $^1H$  NMR (300 MHz,  $CDCl_3$ )  $\delta$  8.16 (d,  $J = 8.4$  Hz, 1H), 8.05 (d,  $J = 8.5$  Hz, 1H), 7.79 (dd,  $J = 16.7, 7.9$  Hz, 2H), 7.57 (t,  $J = 7.2$  Hz, 1H), 7.24 – 7.13 (m, 4H), 7.08 (d,  $J = 8.5$  Hz, 1H), 6.10 (s, 1H), 6.01 (s, 1H), 2.40 (s, 3H);  $^{13}C$  NMR (75 MHz,  $CDCl_3$ )  $\delta$  160.6, 145.9, 140.2, 137.0, 136.6, 131.0, 129.9, 128.7, 128.7, 128.0, 127.6, 127.4, 126.6, 126.2, 119.1, 73., 19.5; HRMS (ESI)  $m/z$  272.1040 ( $M+Na^+$ ), calc. for  $C_{17}H_{15}NONa$  272.1051.

The ee was determined by HPLC analysis: CHIRALCEL OZ-H (4.6 mm i.d. x 250 mm); Hexane/2-propanol = 94/6; flow rate 1.0 mL/min; 25 °C; 254 nm; retention time: 11.4 min (minor) and 12.7 min (major).

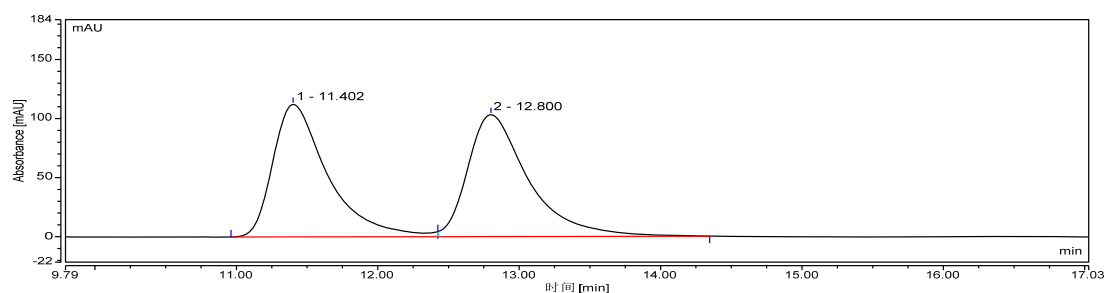

| Entry | Retention Time | Area    | Height | %Area |
|-------|----------------|---------|--------|-------|
| 1     | 11.402         | 50.4517 | 112.20 | 49.09 |
| 2     | 12.800         | 52.3209 | 103.48 | 50.91 |

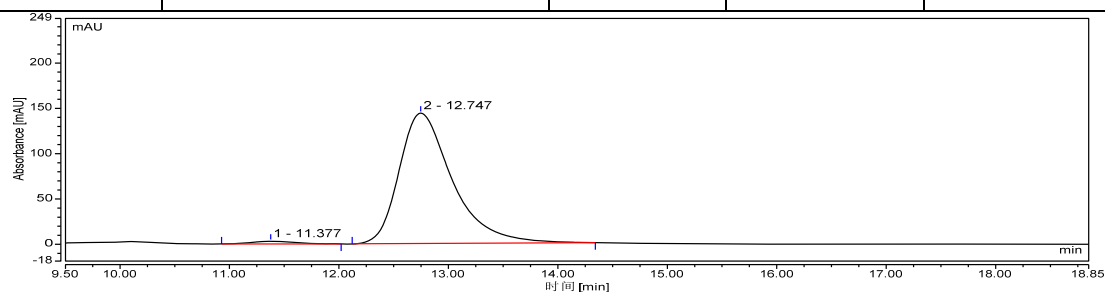

| Entry | Retention Time | Area    | Height | %Area |
|-------|----------------|---------|--------|-------|
| 1     | 11.377         | 1.3977  | 2.98   | 1.69  |
| 2     | 12.747         | 81.1506 | 143.83 | 98.31 |

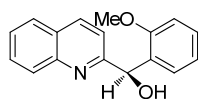

**2d**: white solid, Mp 120.6 – 121.8 °C, 18.8 mg, 71% yield, 83% ee,  $[\alpha]_D^{22}$  +24.4 (*c* 1.0, CHCl<sub>3</sub>); <sup>1</sup>H NMR (300 MHz, CDCl<sub>3</sub>) δ 8.05 (d, *J* = 8.4 Hz, 1H), 7.93 (d, *J* = 8.5 Hz, 1H), 7.66 (dd, *J* = 18.1, 7.8 Hz, 2H), 7.43 (t, *J* = 7.5 Hz, 1H), 7.26 – 7.13 (m, 3H), 6.83 (dd, *J* = 12.9, 7.8 Hz, 2H), 6.33 (d, *J* = 2.9 Hz, 1H), 5.96 (d, *J* = 3.7 Hz, 1H), 3.82 (s, 3H); <sup>13</sup>C NMR (75 MHz, CDCl<sub>3</sub>) δ 161.0, 156.7, 145.9, 136.8, 131.2, 129.6, 128.8, 128.7, 128.1, 127.5, 126.3, 120.9, 119.2, 110.7, 68.5, 55.5; HRMS (ESI) *m/z* 288.1006 (M+Na<sup>+</sup>), calc. for C<sub>17</sub>H<sub>15</sub>NO<sub>2</sub>Na 288.1000.

The ee was determined by HPLC analysis: CHIRAL INB (4.6 mm i.d. x 250 mm); Hexane/2-propanol = 90/10; flow rate 1.0 mL/min; 25 °C; 254 nm; retention time: 10.6 min (minor) and 12.9 min (major).

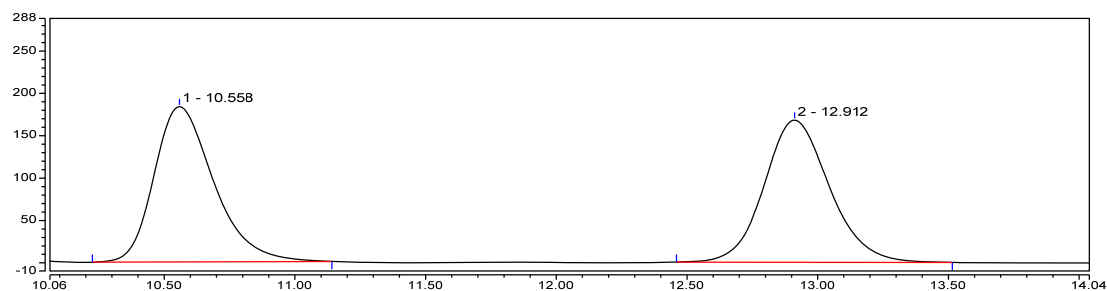

| Entry | Retention Time | Area    | Height | %Area |
|-------|----------------|---------|--------|-------|
| 1     | 10.558         | 48.5202 | 183.23 | 49.87 |
| 2     | 12.912         | 48.7811 | 167.77 | 50.13 |

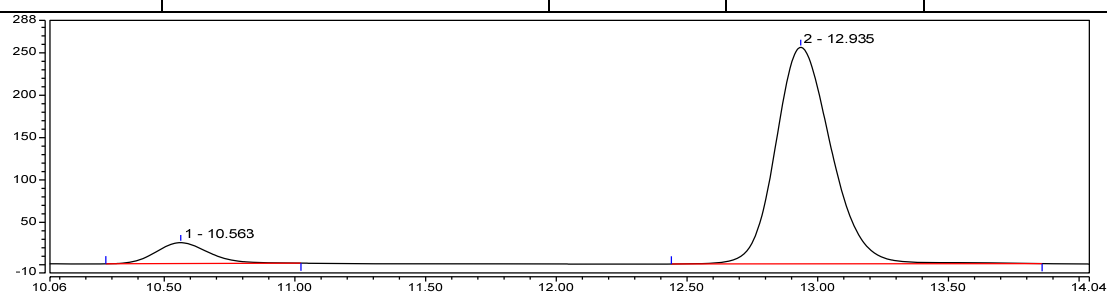

| Entry | Retention Time | Area    | Height | %Area |
|-------|----------------|---------|--------|-------|
| 1     | 10.563         | 5.8003  | 24.66  | 8.42  |
| 2     | 12.935         | 63.0846 | 255.45 | 91.58 |

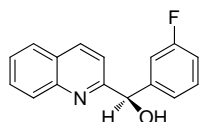

**2e**: white solid, Mp 93.9 – 94.8 °C, 23.5 mg, 93% yield, 95% ee,  $[\alpha]_D^{22}$   $-83.2$  ( $c$  1.0,  $\text{CHCl}_3$ );  $^1\text{H}$  NMR (300 MHz,  $\text{CDCl}_3$ )  $\delta$  8.06 (d,  $J = 8.4$  Hz, 1H), 7.98 (d,  $J = 8.5$  Hz, 1H), 7.69 (dd,  $J = 15.4, 7.6$  Hz, 2H), 7.47 (t,  $J = 7.4$  Hz, 1H), 7.25 – 7.00 (m, 4H), 6.94 – 6.84 (m, 1H), 6.12 (s, 1H), 5.79 (s, 1H);  $^{13}\text{C}$  NMR (75 MHz,  $\text{CDCl}_3$ )  $\delta$  162.9 (d,  $J = 246.5$  Hz), 159.6, 145.9, 145.3 (d,  $J = 6.6$  Hz), 137.2, 130.1, 130.0, 128.7, 127.6, 127.5, 126.7, 123.0 (d,  $J = 2.9$  Hz), 119.0, 114.9 (d,  $J = 21.2$  Hz), 114.1 (d,  $J = 21.8$  Hz), 74.5 (d,  $J = 1.7$  Hz); HRMS (ESI)  $m/z$  276.0801 ( $\text{M}+\text{Na}^+$ ), calc. for  $\text{C}_{16}\text{H}_{12}\text{FNONa}$  276.0801.

The ee was determined by HPLC analysis: CHIRALCEL OZ-H (4.6 mm i.d. x 250 mm); Hexane/2-propanol = 94/6; flow rate 1.0 mL/min; 25 °C; 254 nm; retention time: 10.0 min (minor) and 12.7 min (major).



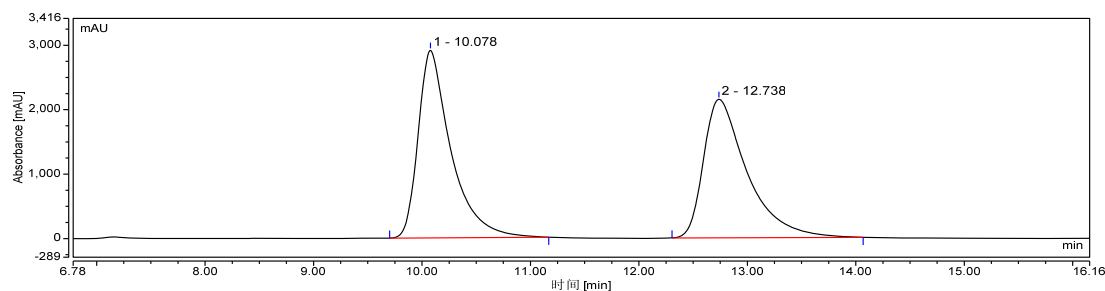

| Entry | Retention Time | Area      | Height  | %Area |
|-------|----------------|-----------|---------|-------|
| 1     | 10.078         | 1034.9378 | 2915.88 | 50.22 |
| 2     | 12.738         | 1025.8774 | 2156.75 | 49.78 |

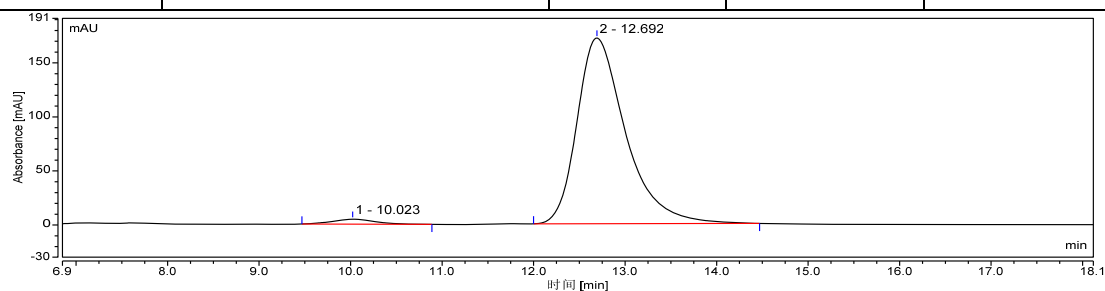

| Entry | Retention Time | Area     | Height | %Area |
|-------|----------------|----------|--------|-------|
| 1     | 10.023         | 2.7309   | 4.75   | 2.46  |
| 2     | 12.692         | 108.1689 | 172.50 | 97.54 |

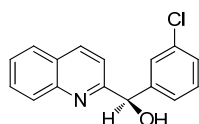

**2f**: white solid, Mp 83.9 – 85.1 °C, 23.7 mg, 88% yield, 94% ee,  $[\alpha]_D^{22}$  –123.7 (*c* 1.0, CHCl<sub>3</sub>); <sup>1</sup>H NMR (300 MHz, CDCl<sub>3</sub>) δ 8.11 (dd, *J* = 19.2, 8.5 Hz, 2H), 7.78 (dd, *J* = 16.4, 8.0 Hz, 2H), 7.57 (t, *J* = 7.4 Hz, 1H), 7.41 (s, 1H), 7.36 – 7.25 (m, 3H), 7.18 (d, *J* = 8.5 Hz, 1H), 6.16 (s, 1H), 5.84 (s, 1H); <sup>13</sup>C NMR (75 MHz, CDCl<sub>3</sub>) δ 159.5, 145.9, 144.8, 137.3, 134.5, 130.1, 129.9, 128.8, 128.2, 127.6, 127.5, 127.5, 126.8, 125.6, 119.0, 74.5; HRMS (ESI) *m/z* 292.0495 (M+Na<sup>+</sup>), calc. for C<sub>16</sub>H<sub>12</sub>ClN<sub>2</sub>O 292.0505.

The ee was determined by HPLC analysis: CHIRAL INB (4.6 mm i.d. x 250 mm); Hexane/2-propanol = 90/10; flow rate 1.0 mL/min; 25 °C; 254 nm; retention time: 9.0 min (minor) and 15.1 min (major).

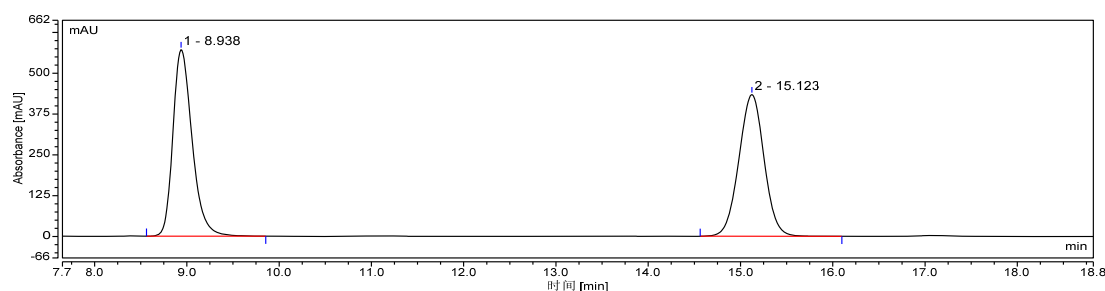

| Entry | Retention Time | Area     | Height | %Area |
|-------|----------------|----------|--------|-------|
| 1     | 8.938          | 137.8615 | 571.80 | 50.09 |
| 2     | 15.123         | 137.3843 | 434.08 | 49.91 |

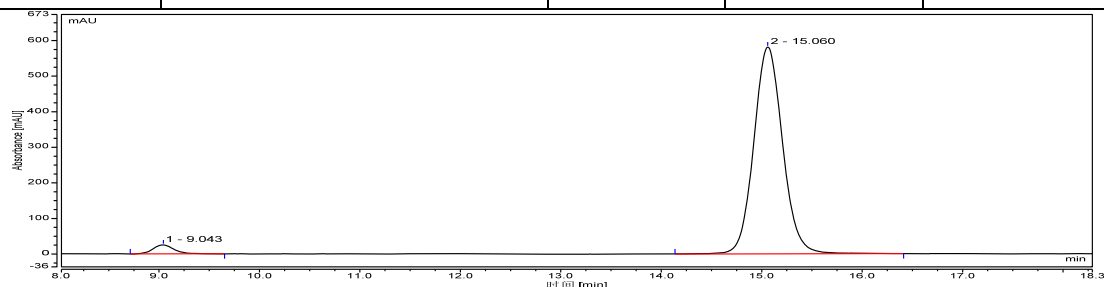

| Entry | Retention Time | Area     | Height | %Area |
|-------|----------------|----------|--------|-------|
| 1     | 9.043          | 6.0046   | 25.17  | 3.02  |
| 2     | 15.060         | 193.0148 | 581.14 | 96.98 |

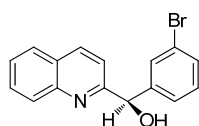

**2g**: white solid, Mp 115.4 – 117.2 °C, 28.8 mg, 92% yield, 95% ee,  $[\alpha]_D^{22}$  –130.3 (*c* 1.0, CHCl<sub>3</sub>); <sup>1</sup>H NMR (300 MHz, CDCl<sub>3</sub>) δ 8.14 (d, *J* = 8.4 Hz, 1H), 8.07 (d, *J* = 8.5 Hz, 1H), 7.78 (dd, *J* = 15.5, 7.6 Hz, 2H), 7.63 – 7.52 (m, 2H), 7.39 (dd, *J* = 14.3, 7.8 Hz, 2H), 7.25 – 7.15 (m, 2H), 6.20 (d, *J* = 3.1 Hz, 1H), 5.84 (s, 1H); <sup>13</sup>C NMR (75 MHz, CDCl<sub>3</sub>) δ 159.5, 145.8, 145.0, 137.3, 131.0, 130.3, 130.2, 130.0, 128.7, 127.6, 127.5, 126.8, 126.0, 122.7, 119.0, 74.4; HRMS (ESI) *m/z* 335.9998 (M+Na<sup>+</sup>), calc. for C<sub>16</sub>H<sub>12</sub>BrNONa 336.0000.

The ee was determined by HPLC analysis: CHIRAL INB (4.6 mm i.d. x 250 mm); Hexane/2-propanol = 90/10; flow rate 1.0 mL/min; 25 °C; 230 nm; retention time: 9.2 min (minor) and 15.3 min (major).

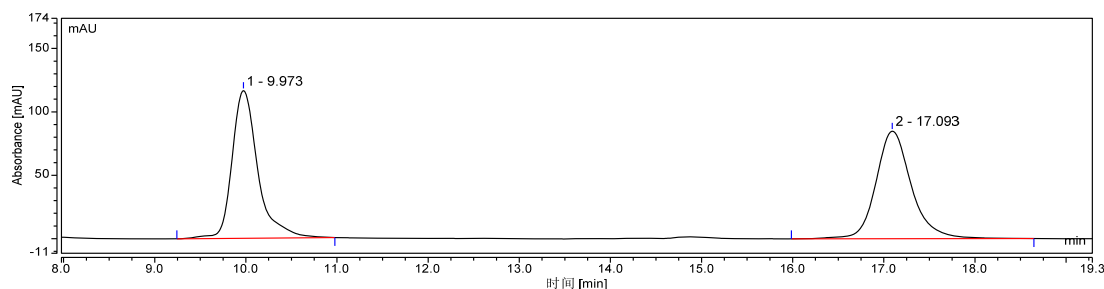

| Entry | Retention Time | Area    | Height | %Area |
|-------|----------------|---------|--------|-------|
| 1     | 9.973          | 38.2674 | 116.49 | 50.04 |
| 2     | 17.093         | 38.2118 | 84.80  | 49.96 |

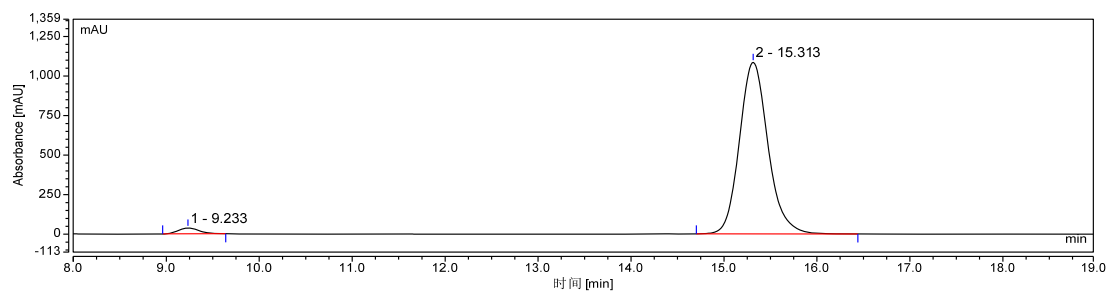

| Entry | Retention Time | Area     | Height  | %Area |
|-------|----------------|----------|---------|-------|
| 1     | 9.233          | 9.4314   | 36.86   | 2.38  |
| 2     | 15.313         | 386.2212 | 1084.72 | 97.62 |

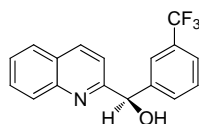

**2h**: white solid, Mp 79.2 – 80.8 °C, 30.0 mg, >99% yield, 94% ee,  $[\alpha]_D^{22}$  -76.1 (*c* 1.0, CHCl<sub>3</sub>); <sup>1</sup>H NMR (300 MHz, CDCl<sub>3</sub>) δ 8.16 (d, *J* = 8.4 Hz, 1H), 8.08 (d, *J* = 8.5 Hz, 1H), 7.78 (dd, *J* = 14.9, 8.1 Hz, 3H), 7.66 – 7.52 (m, 3H), 7.45 (t, *J* = 7.7 Hz, 1H), 7.18 (d, *J* = 8.5 Hz, 1H), 6.26 (s, 1H), 5.94 (s, 1H); <sup>13</sup>C NMR (75 MHz, CDCl<sub>3</sub>) δ 159.5, 146.0, 143.8, 137.5, 131.0 (q, *J* = 30.1 Hz), 130.8, 130.2, 129.2, 128.8, 127.7, 127.6, 126.9, 124.9 (q, *J* = 3.7 Hz), 124.2 (q, *J* = 3.8 Hz), 124.1 (q, *J* = 272.4 Hz), 119.0, 74.7; HRMS (ESI) *m/z* 326.0767 (M+Na<sup>+</sup>), calc. for C<sub>17</sub>H<sub>12</sub>F<sub>3</sub>NONa 326.0769.

The ee was determined by HPLC analysis: CHIRAL INB (4.6 mm i.d. x 250 mm); Hexane/2-propanol = 90/10; flow rate 1.0 mL/min; 25 °C; 254 nm; retention time: 7.7 min (minor) and 13.3 min (major).

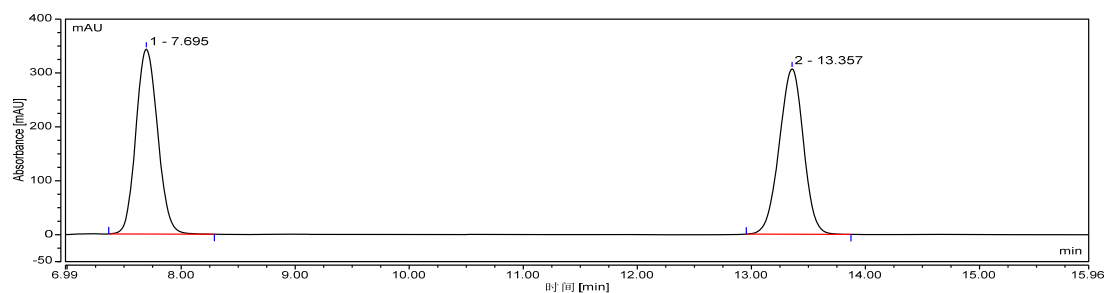

| Entry | Retention Time | Area    | Height | %Area |
|-------|----------------|---------|--------|-------|
| 1     | 7.695          | 75.8652 | 343.28 | 50.01 |
| 2     | 13.357         | 75.8257 | 307.36 | 49.99 |

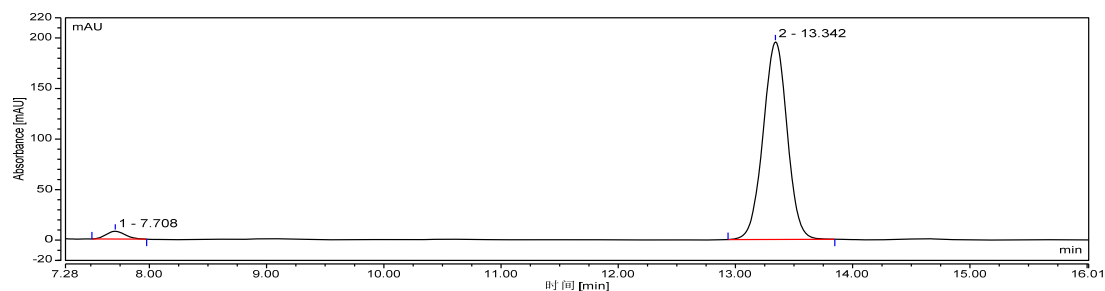

| Entry | Retention Time | Area    | Height | %Area |
|-------|----------------|---------|--------|-------|
| 1     | 7.708          | 1.5527  | 7.86   | 3.20  |
| 2     | 13.342         | 46.9742 | 195.89 | 96.80 |

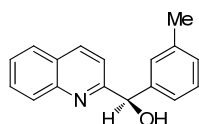

**2i**: white solid, Mp 82.2 – 83.8 °C, 20.4 mg, 82% yield, 91% ee,  $[\alpha]_D^{22}$  -124.9 (*c* 1.0, CHCl<sub>3</sub>); <sup>1</sup>H NMR (300 MHz, CDCl<sub>3</sub>) δ 8.15 (d, *J* = 8.4 Hz, 1H), 8.05 (d, *J* = 8.5 Hz, 1H), 7.77 (dd, *J* = 15.4, 7.5 Hz, 2H), 7.55 (t, *J* = 7.1 Hz, 1H), 7.30 (d, *J* = 7.9 Hz, 2H), 7.17 (t, *J* = 8.5 Hz, 3H), 6.11 (s, 1H), 5.86 (s, 1H), 2.33 (s, 3H); <sup>13</sup>C NMR (75 MHz, CDCl<sub>3</sub>) δ 160.6, 145.8, 139.8, 137.7, 137.0, 129.9, 129.3, 128.7, 127.6, 127.4, 127.4, 126.6, 119.3, 74.9, 21.1; HRMS (ESI) *m/z* 272.1051 (M+Na<sup>+</sup>), calc. for C<sub>17</sub>H<sub>15</sub>NONa 272.1051.

The ee was determined by HPLC analysis: CHIRALCEL OZ-H (4.6 mm i.d. x 250 mm); Hexane/2-propanol = 94/6; flow rate 1.0 mL/min; 25 °C; 254 nm; retention time: 15.6 min (minor) and 20.8 min (major).

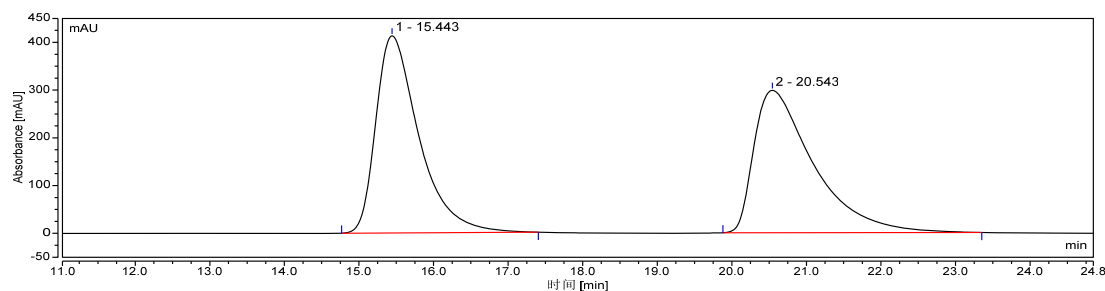

| Entry | Retention Time | Area     | Height | %Area |
|-------|----------------|----------|--------|-------|
| 1     | 15.443         | 279.3198 | 413.34 | 49.95 |
| 2     | 20.543         | 279.8474 | 298.99 | 50.05 |

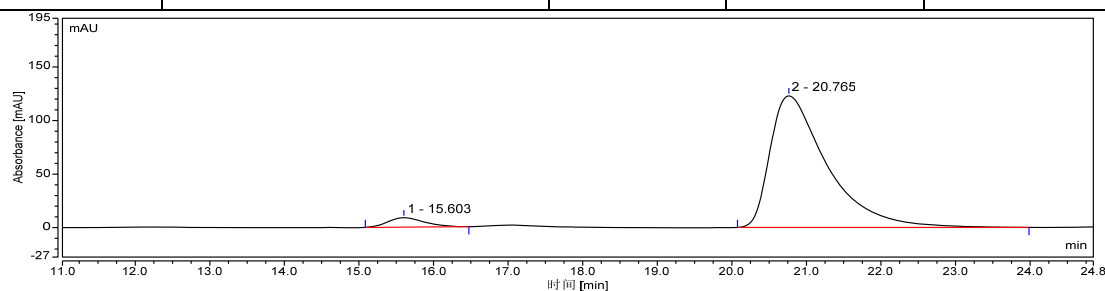

| Entry | Retention Time | Area     | Height | %Area |
|-------|----------------|----------|--------|-------|
| 1     | 15.603         | 5.0897   | 8.90   | 4.48  |
| 2     | 20.765         | 108.6178 | 123.00 | 95.52 |

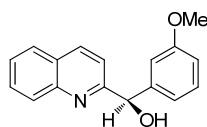

**2j**: white solid, Mp 125.6 – 126.8 °C, 20.4 mg, 77% yield, 88% ee,  $[\alpha]_D^{22}$  –81.4 (*c* 1.0, CHCl<sub>3</sub>); <sup>1</sup>H NMR (300 MHz, CDCl<sub>3</sub>) δ 8.11 (d, *J* = 8.4 Hz, 1H), 8.00 (d, *J* = 8.5 Hz, 1H), 7.73 (dd, *J* = 14.7, 7.6 Hz, 2H), 7.51 (t, *J* = 7.5 Hz, 1H), 7.26 – 7.14 (m, 2H), 7.05 – 6.91 (m, 2H), 6.80 (dd, *J* = 8.2, 2.1 Hz, 1H), 6.12 (s, 1H), 5.83 (s, 1H), 3.73 (s, 3H); <sup>13</sup>C NMR (75 MHz, CDCl<sub>3</sub>) δ 160.2, 159.8, 145.9, 144.3, 137.0, 129.8, 129.6, 128.7, 127.5, 127.4, 126.5, 119.7, 119.1, 113.5, 112.6, 75.0, 55.1; HRMS (ESI) *m/z* 288.1008 (M+Na<sup>+</sup>), calc. for C<sub>17</sub>H<sub>15</sub>NO<sub>2</sub>Na 288.1000.

The ee was determined by HPLC analysis: CHIRALCEL OZ–H (4.6 mm i.d. x 250 mm); Hexane/2-propanol = 94/6; flow rate 1.0 mL/min; 25 °C; 254 nm; retention time: 20.9 min (major) and 23.5 min (minor).

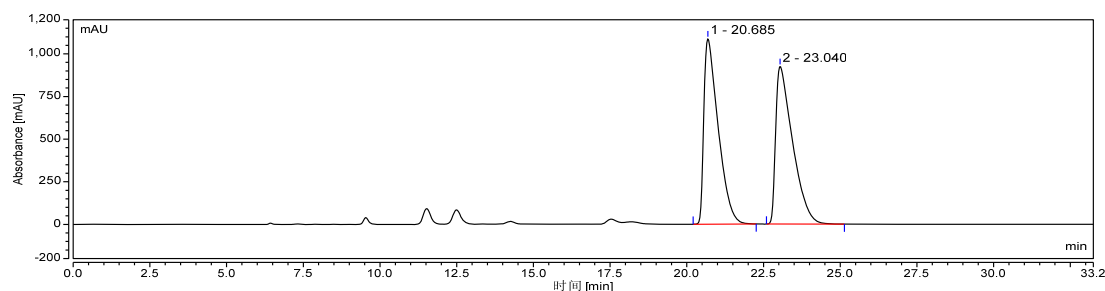

| Entry | Retention Time | Area     | Height  | %Area |
|-------|----------------|----------|---------|-------|
| 1     | 20.685         | 586.8982 | 1087.58 | 49.94 |
| 2     | 23.040         | 588.4198 | 924.89  | 50.06 |

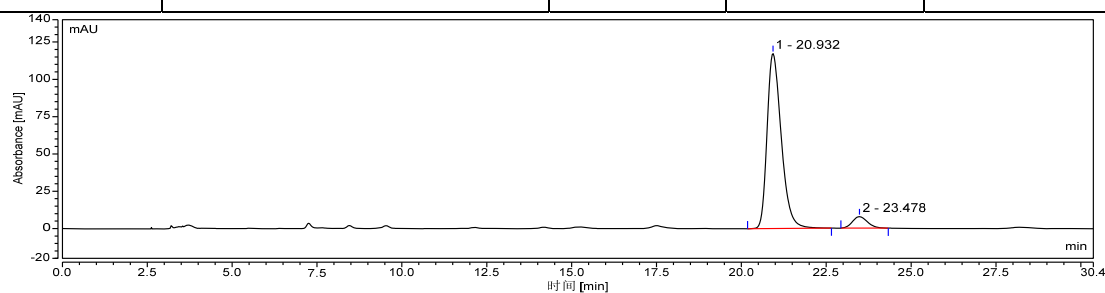

| Entry | Retention Time | Area    | Height | %Area |
|-------|----------------|---------|--------|-------|
| 1     | 20.932         | 56.4126 | 117.36 | 93.90 |
| 2     | 23.478         | 3.6640  | 7.46   | 6.10  |

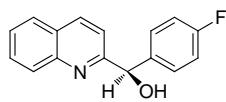

**2k**: white solid, Mp 74.1 – 75.2 °C, 24.3 mg, 96% yield, 94% ee,  $[\alpha]_D^{22}$   $-27.5$  ( $c$  1.0,  $\text{CHCl}_3$ );  $^1\text{H NMR}$  (300 MHz,  $\text{CDCl}_3$ )  $\delta$  8.14 (d,  $J$  = 8.4 Hz, 1H), 8.03 (d,  $J$  = 8.5 Hz, 1H), 7.81 – 7.68 (m, 2H), 7.54 (t,  $J$  = 7.5 Hz, 1H), 7.39 (dd,  $J$  = 8.5, 5.5 Hz, 2H), 7.16 (d,  $J$  = 8.5 Hz, 1H), 7.02 (t,  $J$  = 8.7 Hz, 2H), 6.23 (s, 1H), 5.89 (s, 1H);  $^{13}\text{C NMR}$  (75 MHz,  $\text{CDCl}_3$ )  $\delta$  162.3 (d,  $J$  = 246.1 Hz), 160.3, 145.8, 138.5 (d,  $J$  = 3.1 Hz), 137.0, 129.8, 128.9 (d,  $J$  = 8.2 Hz), 128.6, 127.5, 127.3, 126.6, 118.9, 115.3 (d,  $J$  = 21.5 Hz), 74.4; HRMS (ESI)  $m/z$  276.0795 ( $\text{M}+\text{Na}^+$ ), calc. for  $\text{C}_{16}\text{H}_{12}\text{FNONa}$  276.0801.

The ee was determined by HPLC analysis: CHIRALCEL OZ–H (4.6 mm i.d. x 250 mm); Hexane/2-propanol = 94/6; flow rate 1.0 mL/min; 25 °C; 254 nm; retention time: 11.0 min (minor) and 14.4 min (major).

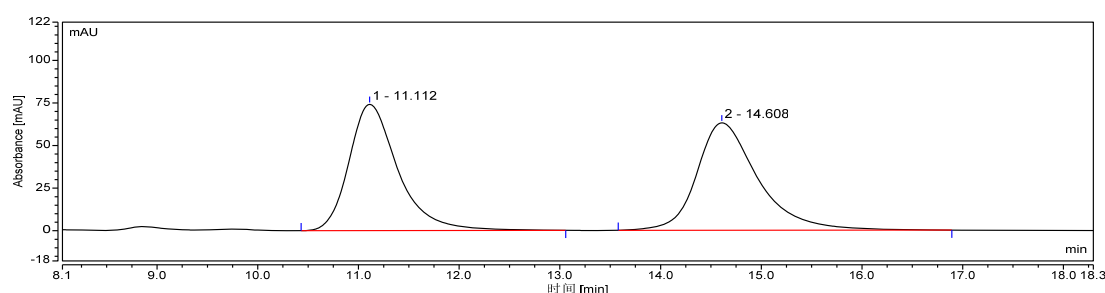

| Entry | Retention Time | Area    | Height | %Area |
|-------|----------------|---------|--------|-------|
| 1     | 11.112         | 41.8234 | 74.14  | 49.66 |
| 2     | 14.608         | 42.3953 | 62.27  | 50.34 |

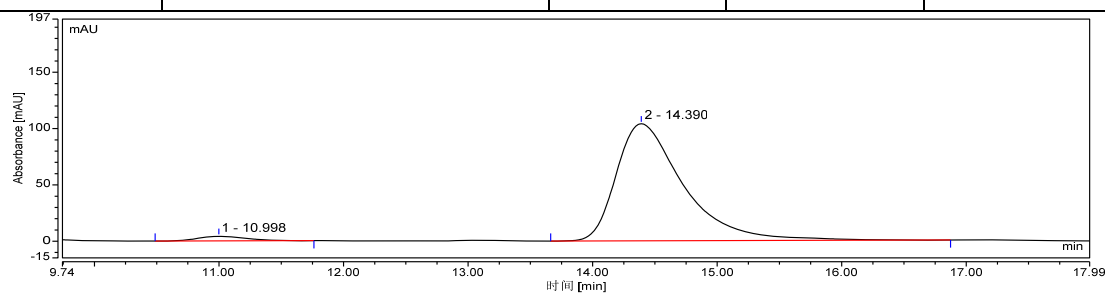

| Entry | Retention Time | Area    | Height | %Area |
|-------|----------------|---------|--------|-------|
| 1     | 10.998         | 1.8127  | 4.09   | 2.72  |
| 2     | 14.390         | 64.9014 | 103.93 | 97.28 |

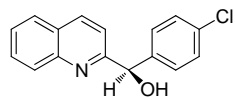

**2l**: white solid, Mp 105.7 – 106.8 °C, 26.4 mg, 98% yield, 93% ee,  $[\alpha]_D^{22}$   $-11.4$  ( $c$  1.0,  $\text{CHCl}_3$ );  $^1\text{H NMR}$  (300 MHz,  $\text{CDCl}_3$ )  $\delta$  8.14 (d,  $J$  = 8.4 Hz, 1H), 8.06 (d,  $J$  = 8.5 Hz, 1H), 7.77 (dd,  $J$  = 15.3, 7.7 Hz, 2H), 7.56 (t,  $J$  = 7.5 Hz, 1H), 7.33 (q,  $J$  = 8.5 Hz, 4H), 7.15 (d,  $J$  = 8.5 Hz, 1H), 6.18 (d,  $J$  = 2.8 Hz, 1H), 5.86 (s, 1H);  $^{13}\text{C NMR}$  (75 MHz,  $\text{CDCl}_3$ )  $\delta$  159.9, 145.9, 141.2, 137.2, 133.7, 130.0, 128.7,

128.7, 127.6, 127.4, 126.7, 119.0, 74.4; HRMS (ESI)  $m/z$  292.0512 ( $M+Na^+$ ), calc. for  $C_{16}H_{12}ClNONa$  292.0505.

The ee was determined by HPLC analysis: CHIRAL INB (4.6 mm i.d. x 250 mm); Hexane/2-propanol = 90/10; flow rate 1.0 mL/min; 25 °C; 230 nm; retention time: 9.2 min (minor) and 14.3 min (major).

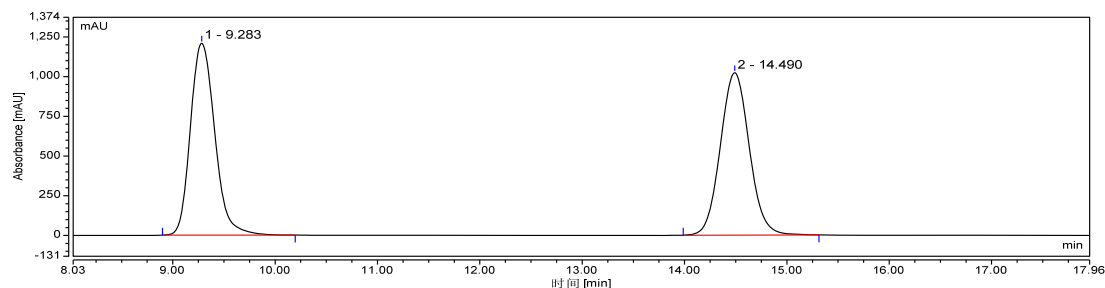

| Entry | Retention Time | Area     | Height  | %Area |
|-------|----------------|----------|---------|-------|
| 1     | 9.283          | 333.6183 | 1207.95 | 49.91 |
| 2     | 14.490         | 334.8675 | 1021.66 | 50.09 |

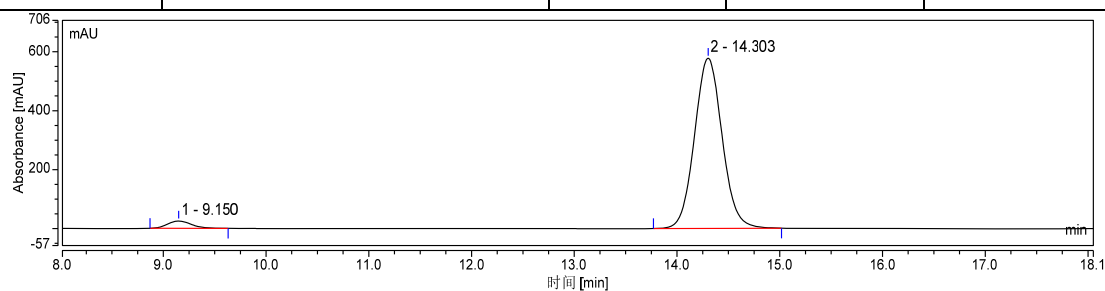

| Entry | Retention Time | Area     | Height | %Area |
|-------|----------------|----------|--------|-------|
| 1     | 9.150          | 6.6336   | 24.63  | 3.55  |
| 2     | 14.303         | 180.1893 | 577.52 | 96.45 |

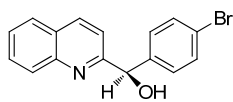

**2m**: white solid, Mp 108.9 – 109.8 °C, 29.4 mg, 94% yield, 96% ee,  $[\alpha]_D^{22} -107.0$  ( $c$  1.0,  $CHCl_3$ );  $^1H$  NMR (300 MHz,  $CDCl_3$ )  $\delta$  8.14 (d,  $J$  = 8.4 Hz, 1H), 8.06 (d,  $J$  = 8.5 Hz, 1H), 7.77 (dd,  $J$  = 15.6, 7.7 Hz, 2H), 7.56 (t,  $J$  = 7.4 Hz, 1H), 7.46 (d,  $J$  = 8.3 Hz, 2H), 7.30 (d,  $J$  = 8.3 Hz, 2H), 7.15 (d,  $J$  = 8.5 Hz, 1H), 6.18 (s, 1H), 5.84 (s, 1H);  $^{13}C$  NMR (75 MHz,  $CDCl_3$ )  $\delta$  159.7, 145.9, 141.8, 137.2, 131.7, 130.0, 129.0, 128.7, 127.6, 127.4, 126.7, 121.9, 119.0, 74.5; HRMS (ESI)  $m/z$  336.0002 ( $M+Na^+$ ), calc. for  $C_{16}H_{12}BrNONa$  336.0000.

The ee was determined by HPLC analysis: CHIRAL INB (4.6 mm i.d. x 250 mm); Hexane/2-propanol = 90/10; flow rate 1.0 mL/min; 25 °C; 254 nm; retention time: 10.4 min (minor) and 16.5 min (major).

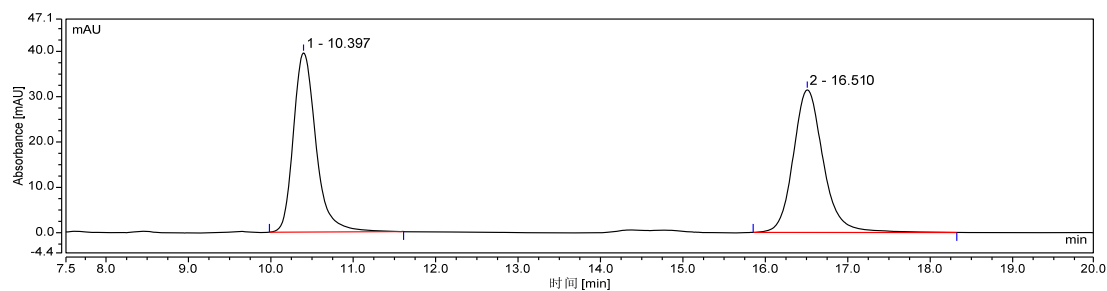

| Entry | Retention Time | Area    | Height | %Area |
|-------|----------------|---------|--------|-------|
| 1     | 10.397         | 24.0338 | 40.13  | 49.92 |
| 2     | 16.510         | 24.1108 | 33.36  | 50.08 |

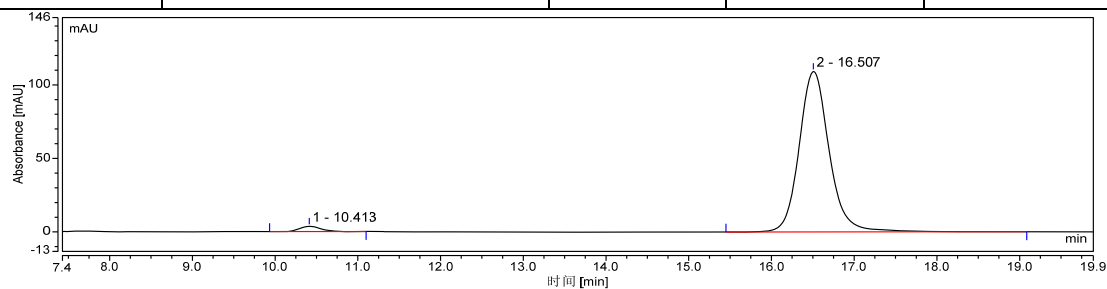

| Entry | Retention Time | Area    | Height | %Area |
|-------|----------------|---------|--------|-------|
| 1     | 10.413         | 1.0166  | 3.53   | 2.16  |
| 2     | 16.507         | 46.0037 | 109.15 | 97.84 |

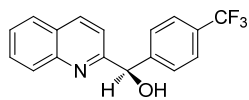

**2n**: white solid, Mp 120.3 – 121.8 °C, 29.7 mg, 98% yield, 95% ee,  $[\alpha]_D^{22} -143.8$  (*c* 1.0, CHCl<sub>3</sub>); <sup>1</sup>H NMR (300 MHz, CDCl<sub>3</sub>) δ 8.12 (dd, *J* = 20.2, 8.5 Hz, 2H), 7.79 (dd, *J* = 15.1, 7.7 Hz, 2H), 7.58 (q, *J* = 8.2 Hz, 5H), 7.18 (d, *J* = 8.5 Hz, 1H), 6.21 (s, 1H), 5.94 (s, 1H); <sup>13</sup>C NMR (75 MHz, CDCl<sub>3</sub>) δ 159.4, 146.7, 146.0, 137.4, 130.1, 130.1 (q, *J* = 32.4 Hz), 128.7, 127.6, 127.6, 127.5, 126.9, 125.6 (q, *J* = 3.8 Hz), 124.0 (q, *J* = 272.1 Hz), 118.9, 74.6; HRMS (ESI) *m/z* 326.0766 (M+Na<sup>+</sup>), calc. for C<sub>17</sub>H<sub>12</sub>F<sub>3</sub>NONa 326.0769.

The ee was determined by HPLC analysis: CHIRAL INB (4.6 mm i.d. x 250 mm); Hexane/2-propanol = 90/10; flow rate 1.0 mL/min; 25 °C; 254 nm; retention time: 8.8 min (minor) and 14.6 min (major).

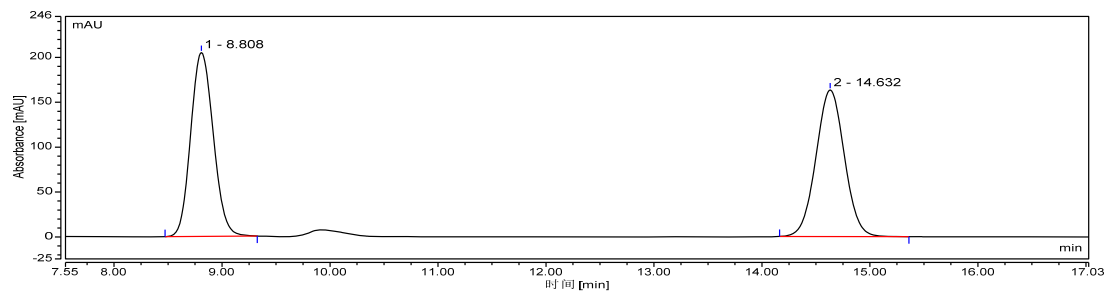



| Entry | Retention Time | Area    | Height | %Area |
|-------|----------------|---------|--------|-------|
| 1     | 8.808          | 49.7134 | 204.83 | 49.97 |
| 2     | 14.632         | 49.7646 | 163.21 | 50.03 |

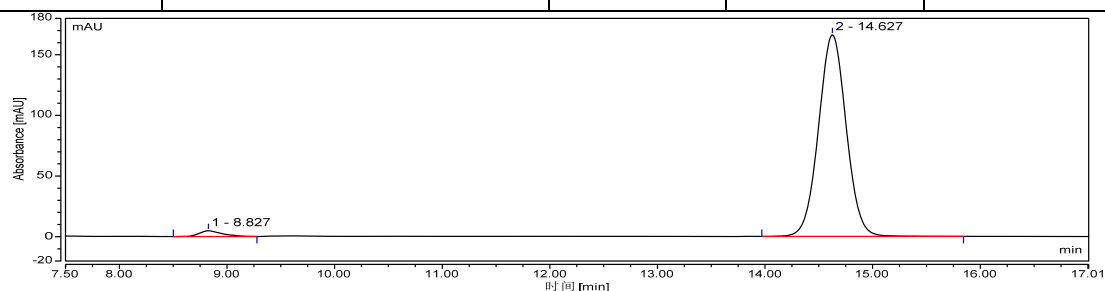

| Entry | Retention Time | Area    | Height | %Area |
|-------|----------------|---------|--------|-------|
| 1     | 8.827          | 1.1684  | 4.77   | 2.30  |
| 2     | 14.627         | 49.5512 | 166.22 | 97.70 |

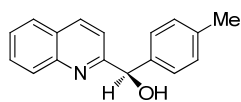

**2o**: white solid, Mp 67.2 – 68.8 °C, 21.9 mg, 88% yield, 91% ee,  $[\alpha]_D^{22}$  –114.5 (*c* 1.0, CHCl<sub>3</sub>); <sup>1</sup>H NMR (300 MHz, CDCl<sub>3</sub>) δ 8.07 (d, *J* = 8.3 Hz, 1H), 7.96 (d, *J* = 8.4 Hz, 1H), 7.69 (dd, *J* = 15.8, 8.1 Hz, 2H), 7.47 (t, *J* = 7.3 Hz, 1H), 7.13 (t, *J* = 12.3 Hz, 4H), 7.02 (s, 1H), 6.05 (s, 1H), 5.75 (s, 1H), 2.23 (s, 3H); <sup>13</sup>C NMR (75 MHz, CDCl<sub>3</sub>) δ 160.4, 145.9, 142.6, 138.3, 137.0, 129.9, 128.8, 128.5, 128.0, 127.6, 126.6, 124.6, 119.3, 75.1, 21.4; HRMS (ESI) *m/z* 272.1044 (M+Na<sup>+</sup>), calc. for C<sub>17</sub>H<sub>15</sub>NONa 272.1051.

The ee was determined by HPLC analysis: CHIRAL INB (4.6 mm i.d. x 250 mm); Hexane/2-propanol = 94/6; flow rate 1.0 mL/min; 25 °C; 254 nm; retention time: 15.6 min (minor) and 20.8 min (major).

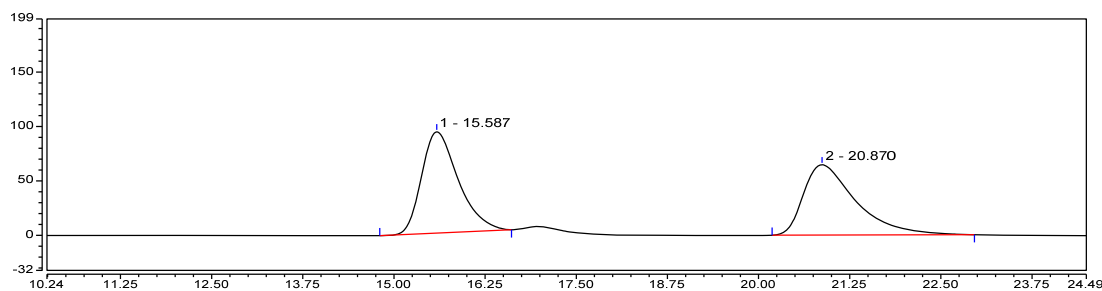

| Entry | Retention Time | Area    | Height | %Area |
|-------|----------------|---------|--------|-------|
| 1     | 15.587         | 54.3776 | 93.09  | 50.24 |
| 2     | 20.870         | 53.8486 | 64.64  | 49.76 |

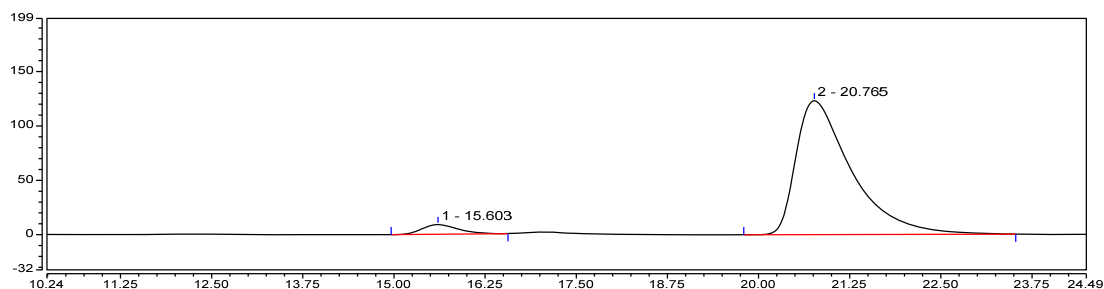

| Entry | Retention Time | Area     | Height | %Area |
|-------|----------------|----------|--------|-------|
| 1     | 15.603         | 5.0858   | 8.90   | 4.48  |
| 2     | 20.765         | 108.4811 | 122.96 | 95.52 |

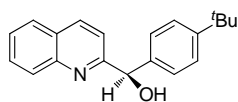

**2p**: white solid, Mp 83.7 – 85.2 °C, 24.7 mg, 85% yield, 93% ee,  $[\alpha]_D^{22}$  –125.6 (*c* 1.0, CHCl<sub>3</sub>); <sup>1</sup>H NMR (300 MHz, CDCl<sub>3</sub>) δ 8.16 (d, *J* = 8.4 Hz, 1H), 8.02 (d, *J* = 8.5 Hz, 1H), 7.82 – 7.69 (m, 2H), 7.55 (dd, *J* = 11.1, 3.9 Hz, 1H), 7.42 – 7.32 (m, 4H), 7.22 (d, *J* = 8.5 Hz, 1H), 6.08 (s, 1H), 5.90 (s, 1H), 1.32 (s, 9H); <sup>13</sup>C NMR (75 MHz, CDCl<sub>3</sub>) δ 160.7, 150.7, 145.9, 139.7, 136.8, 129.7, 128.7, 127.5, 127.4, 127.0, 126.4, 125.5, 119.3, 74.9, 34.4, 31.2; HRMS (ESI) *m/z* 314.1513 (M+Na<sup>+</sup>), calc. for C<sub>20</sub>H<sub>21</sub>NONa 314.1521.

The ee was determined by HPLC analysis: CHIRAL INB (4.6 mm i.d. x 250 mm); Hexane/2-propanol = 90/10; flow rate 1.0 mL/min; 25 °C; 254 nm; retention time: 8.2 min (minor) and 13.8 min (major).

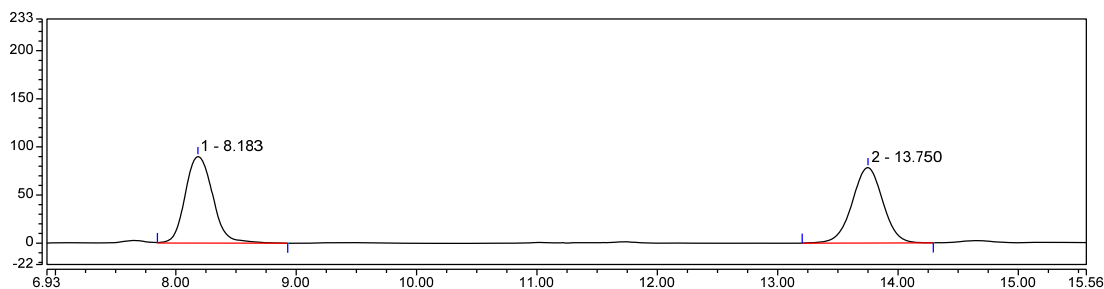

| Entry | Retention Time | Area    | Height | %Area |
|-------|----------------|---------|--------|-------|
| 1     | 8.183          | 23.9126 | 89.90  | 50.78 |
| 2     | 13.750         | 23.1737 | 78.34  | 49.22 |

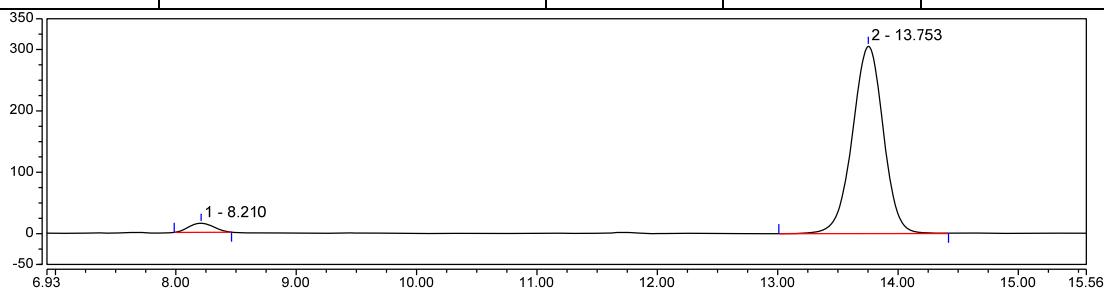

| Entry | Retention Time | Area    | Height | %Area |
|-------|----------------|---------|--------|-------|
| 1     | 8.210          | 3.5132  | 14.63  | 3.73  |
| 2     | 13.753         | 90.7328 | 305.04 | 96.27 |

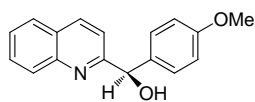

**2q**: white solid, Mp 65.1 – 65.9 °C, 21.5 mg, 81% yield, 95% ee,  $[\alpha]_D^{22}$  –84.3 (*c* 1.0, CHCl<sub>3</sub>); <sup>1</sup>H NMR (300 MHz, CDCl<sub>3</sub>) δ 8.15 (d, *J* = 8.4 Hz, 1H), 8.02 (d, *J* = 8.5 Hz, 1H), 7.82 – 7.69 (m, 2H), 7.54 (t, *J* = 7.2 Hz, 1H), 7.33 (d, *J* = 8.6 Hz, 2H), 7.17 (d, *J* = 8.5 Hz, 1H), 6.88 (d, *J* = 8.6 Hz, 2H), 6.11 (s, 1H), 5.85 (s, 1H), 3.77 (s, 3H); <sup>13</sup>C NMR (75 MHz, CDCl<sub>3</sub>) δ 160.7, 159.2, 145.8, 136.8, 134.9, 129.8, 128.6, 128.6, 127.5, 127.3, 126.4, 119.2, 113.9, 74.6, 55.1; HRMS (ESI) *m/z* 266.1182 (M+H<sup>+</sup>), calc. for C<sub>17</sub>H<sub>16</sub>NO<sub>2</sub> 266.1181.

The ee was determined by HPLC analysis: CHIRAL INB (4.6 mm i.d. x 250 mm); Hexane/2-propanol = 90/10; flow rate 1.0 mL/min; 25 °C; 254 nm; retention time: 11.8 min (minor) and 17.4 min (major).

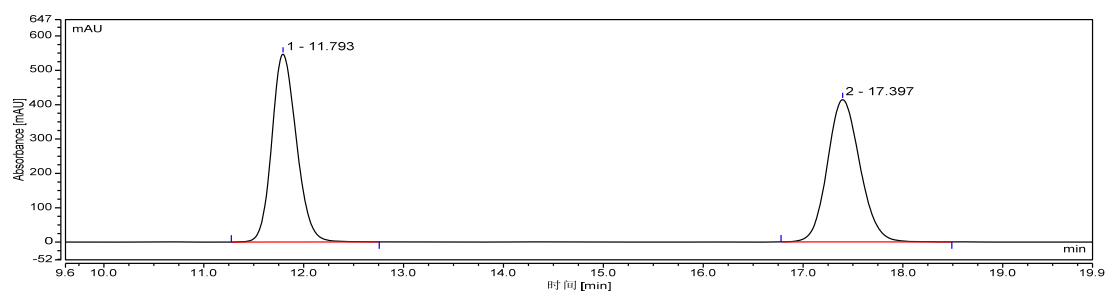

| Entry | Retention Time | Area     | Height | %Area |
|-------|----------------|----------|--------|-------|
| 1     | 11.793         | 156.1545 | 546.47 | 49.99 |
| 2     | 17.397         | 156.2224 | 413.99 | 50.01 |

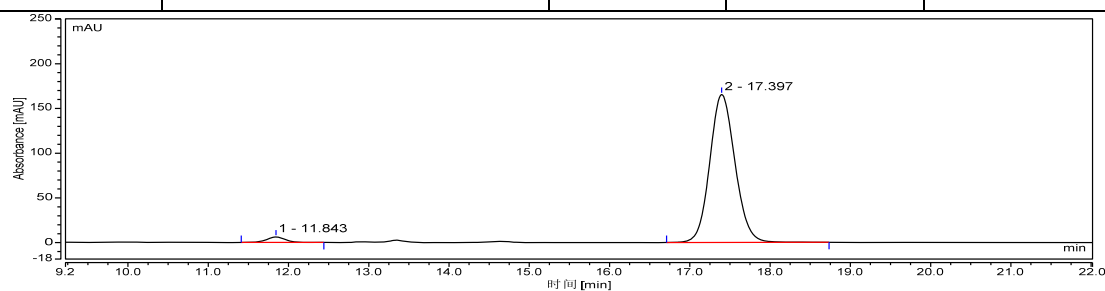

| Entry | Retention Time | Area    | Height | %Area |
|-------|----------------|---------|--------|-------|
| 1     | 11.843         | 1.6445  | 6.10   | 2.66  |
| 2     | 17.397         | 60.2922 | 165.38 | 97.34 |

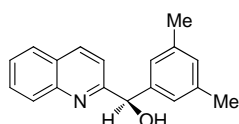

**2r**: white solid, Mp 82.2 – 83.6 °C, 20.8 mg, 79% yield, 90% ee,  $[\alpha]_D^{22}$  –158.1 (*c* 1.0, CHCl<sub>3</sub>); <sup>1</sup>H NMR (300 MHz, CDCl<sub>3</sub>) δ 8.17 (d, *J* = 8.4 Hz, 1H), 8.05 (d, *J* = 8.5 Hz, 1H), 7.78 (dd, *J* = 15.9, 7.7 Hz, 2H), 7.56 (t, *J* = 7.2 Hz, 1H), 7.21 (d, *J* = 8.5 Hz, 1H), 7.03 (s, 2H), 6.93 (s, 1H), 6.10 (d, *J* = 3.4 Hz, 1H), 5.81 (d, *J* = 2.8 Hz, 1H), 2.30 (s, 6H); <sup>13</sup>C NMR (75 MHz, CDCl<sub>3</sub>) δ 160.6, 145.9, 142.6, 138.1, 136.9, 129.8, 129.6, 128.8, 127.6, 127.4, 126.5, 125.2, 119.3, 75.2, 21.2; HRMS (ESI) *m/z* 286.1194 (M+Na<sup>+</sup>), calc. for C<sub>18</sub>H<sub>17</sub>NONa 286.1208.

The ee was determined by HPLC analysis: CHIRAL INB (4.6 mm i.d. x 250 mm); Hexane/2-propanol = 90/10; flow rate 1.0 mL/min; 25 °C; 254 nm; retention time: 9.9 min (minor) and 20.1 min (major).

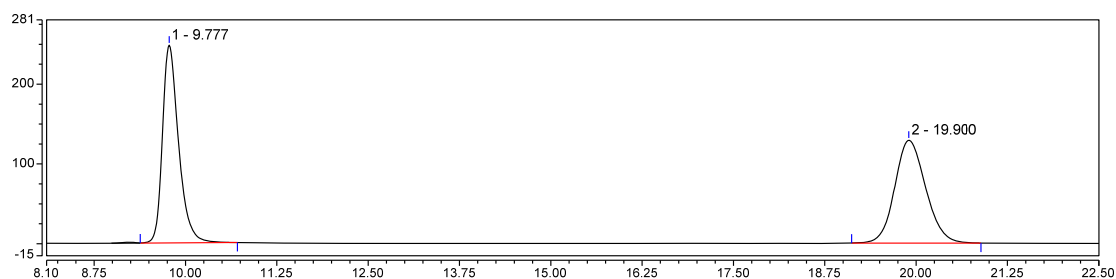

| Entry | Retention Time | Area    | Height | %Area |
|-------|----------------|---------|--------|-------|
| 1     | 9.777          | 63.4811 | 248.02 | 50.07 |
| 2     | 19.900         | 63.2995 | 128.94 | 49.93 |

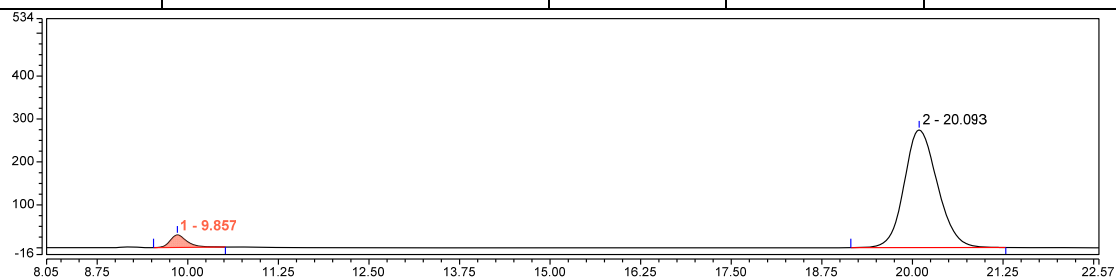

| Entry | Retention Time | Area     | Height | %Area |
|-------|----------------|----------|--------|-------|
| 1     | 9.857          | 7.7457   | 28.96  | 5.05  |
| 2     | 20.093         | 145.6684 | 274.08 | 94.95 |

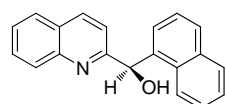

**2s**: white solid, Mp 167.5 – 168.5 °C, 21.7 mg, 76% yield, 96% ee,  $[\alpha]_D^{22}$  –122.5 (*c* 1.0, CHCl<sub>3</sub>); <sup>1</sup>H NMR (300 MHz, CDCl<sub>3</sub>) δ 8.22 (t, *J* = 7.1 Hz, 2H), 7.99 (d, *J* = 8.5 Hz, 1H), 7.92 – 7.75 (m, 4H), 7.62 – 7.37 (m, 5H), 7.11 (d, *J* = 8.5 Hz, 1H), 6.53 (s, 1H), 6.15 (s, 1H); <sup>13</sup>C NMR (75 MHz, CDCl<sub>3</sub>) δ 160.8, 146.1, 137.7, 137.1, 134.3, 131.5, 130.0, 129.0, 128.8, 128.7, 127.6, 127.5, 127.0, 126.7,

126.3, 125.6, 125.3, 124.3, 119.1, 73.9; HRMS (ESI)  $m/z$  286.1219 ( $M+H^+$ ), calc. for  $C_{20}H_{16}NO$  286.1232.

The ee was determined by HPLC analysis: CHIRALPAK IE (4.6 mm i.d. x 250 mm); Hexane/2-propanol = 90/10; flow rate 1.0 mL/min; 25 °C; 254 nm; retention time: 18.4 min (major) and 20.6 min (minor).

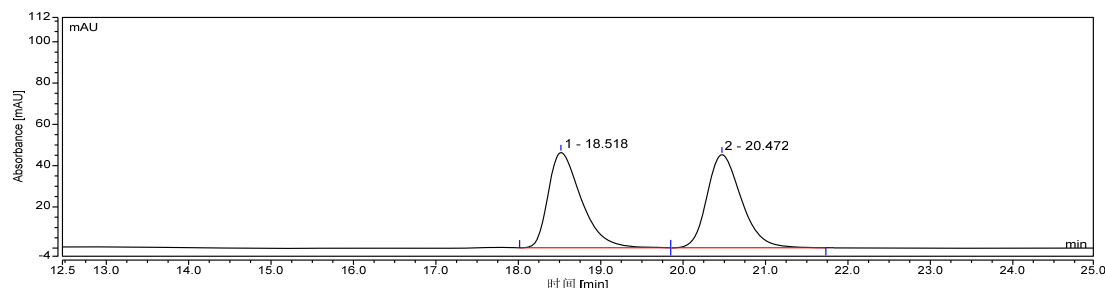

| Entry | Retention Time | Area    | Height | %Area |
|-------|----------------|---------|--------|-------|
| 1     | 18.518         | 21.4431 | 46.13  | 49.66 |
| 2     | 20.472         | 21.7393 | 45.08  | 50.34 |

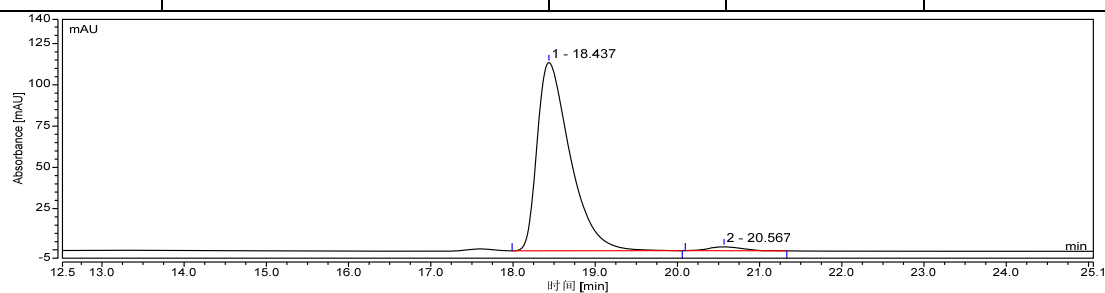

| Entry | Retention Time | Area    | Height | %Area |
|-------|----------------|---------|--------|-------|
| 1     | 18.437         | 52.9129 | 114.04 | 97.91 |
| 2     | 20.567         | 1.1302  | 2.45   | 2.09  |

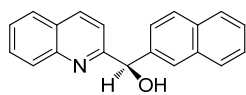

**2t**: white solid, Mp 131.8 – 132.5 °C, 27.6 mg, 97% yield, 90% ee,  $[\alpha]_D^{22} -77.7$  ( $c$  1.0,  $CHCl_3$ );  $^1H$  NMR (300 MHz,  $CDCl_3$ )  $\delta$  8.19 (d,  $J = 8.4$  Hz, 1H), 8.03 (d,  $J = 8.5$  Hz, 1H), 7.96 (s, 1H), 7.89 – 7.73 (m, 5H), 7.62 – 7.40 (m, 4H), 7.21 (d,  $J = 8.5$  Hz, 1H), 6.23 (s, 1H), 6.05 (s, 1H);  $^{13}C$  NMR (75 MHz,  $CDCl_3$ )  $\delta$  160.3, 146.0, 140.1, 137.0, 133.3, 133.2, 130.0, 128.8, 128.6, 128.0, 127.7, 127.6, 127.5, 126.7, 126.7, 126.2, 126.0, 125.0, 119.3, 75.3; HRMS (ESI)  $m/z$  308.1058 ( $M+Na^+$ ), calc. for  $C_{20}H_{15}NONa$  308.1051.

The ee was determined by HPLC analysis: CHIRALCEL OZ-H (4.6 mm i.d. x 250 mm); Hexane/2-propanol = 94/6; flow rate 1.0 mL/min; 25 °C; 254 nm; retention time: 12.2 min (minor) and 15.2 min (major).

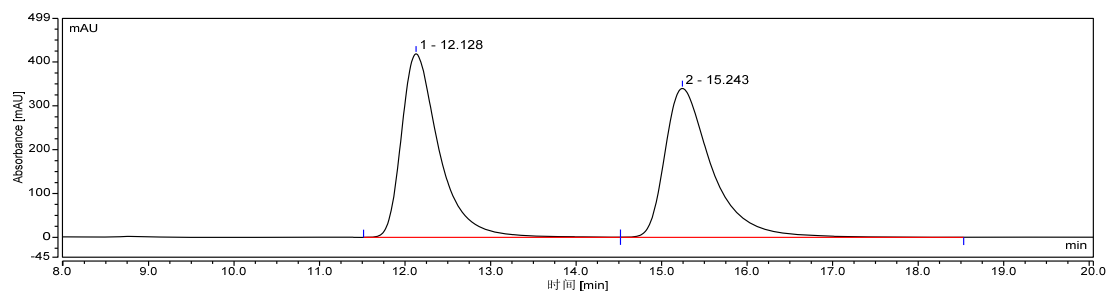

| Entry | Retention Time | Area     | Height | %Area |
|-------|----------------|----------|--------|-------|
| 1     | 12.128         | 213.9403 | 418.38 | 49.81 |
| 2     | 15.243         | 215.5344 | 339.48 | 50.19 |

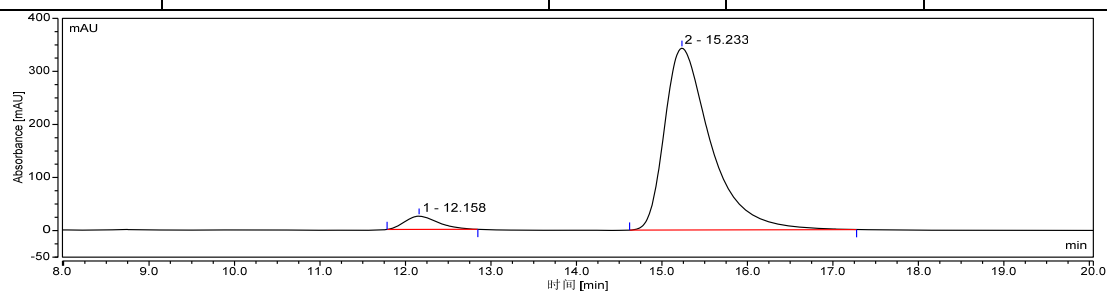

| Entry | Retention Time | Area     | Height | %Area |
|-------|----------------|----------|--------|-------|
| 1     | 12.158         | 11.2472  | 24.87  | 4.91  |
| 2     | 15.233         | 217.9318 | 343.19 | 95.09 |

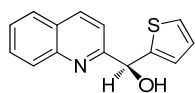

**2u**: white solid, Mp 118.1 – 118.8 °C, 23.9 mg, 98% yield, 90% ee,  $[\alpha]_D^{22}$  –16.6 (*c* 1.0, CHCl<sub>3</sub>); <sup>1</sup>H NMR (300 MHz, CDCl<sub>3</sub>) δ 8.14 (dd, *J* = 8.4, 4.9 Hz, 2H), 7.88 – 7.72 (m, 2H), 7.57 (t, *J* = 7.5 Hz, 1H), 7.34 (d, *J* = 8.5 Hz, 1H), 7.12 (d, *J* = 3.3 Hz, 1H), 6.98 (dd, *J* = 4.9, 3.7 Hz, 1H), 6.18 (s, 1H), 6.10 (s, 1H); <sup>13</sup>C NMR (75 MHz, CDCl<sub>3</sub>) δ 159.5, 146.7, 145.8, 137.4, 130.1, 128.7, 127.6, 127.6, 126.9, 126.6, 125.9, 125.6, 119.0, 70.8; HRMS (ESI) *m/z* 264.0464 (M+Na<sup>+</sup>), calc. for C<sub>14</sub>H<sub>11</sub>NOSNa 264.0459.

The ee was determined by HPLC analysis: CHIRAL INB (4.6 mm i.d. x 250 mm); Hexane/2-propanol = 90/10; flow rate 1.0 mL/min; 25 °C; 254 nm; retention time: 12.3 min (minor) and 21.8 min (major).

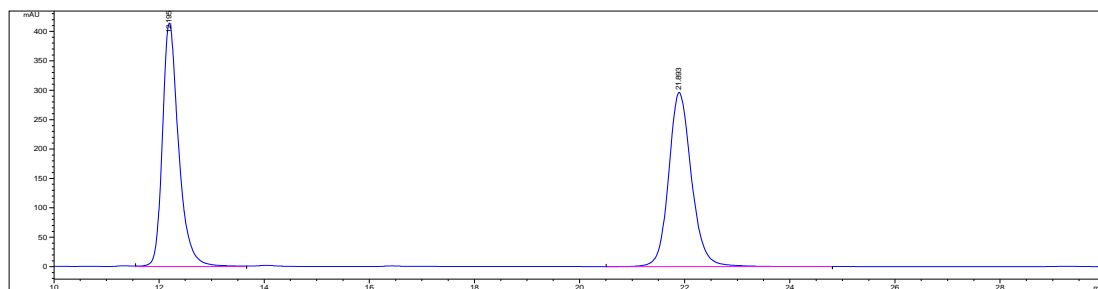

| Entry | Retention Time | Area   | Height | %Area  |
|-------|----------------|--------|--------|--------|
| 1     | 12.195         | 8852.8 | 413.8  | 49.781 |
| 2     | 21.893         | 8930.6 | 296.1  | 50.219 |

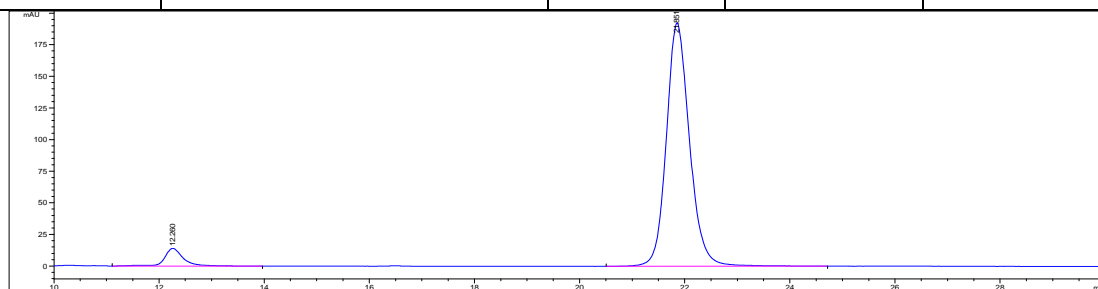

| Entry | Retention Time | Area   | Height | %Area  |
|-------|----------------|--------|--------|--------|
| 1     | 12.260         | 299.9  | 13.9   | 4.841  |
| 2     | 21.851         | 5894.7 | 192.4  | 95.159 |

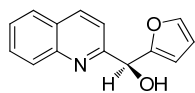

**2v**: yellow solid, Mp 84.2 – 84.6 °C, 17.1 mg, 76% yield, 91% ee,  $[\alpha]_D^{22} +78.8$  (*c* 1.0, CHCl<sub>3</sub>); <sup>1</sup>H NMR (300 MHz, CDCl<sub>3</sub>) δ 8.14 (d, *J* = 8.4 Hz, 2H), 7.91 – 7.69 (m, 2H), 7.57 (t, *J* = 7.3 Hz, 1H), 7.42 – 7.28 (m, 2H), 6.34 (s, 2H), 5.96 (s, 1H), 5.86 (s, 1H); <sup>13</sup>C NMR (75 MHz, CDCl<sub>3</sub>) δ 157.6, 154.7, 146.1, 142.8, 137.2, 130.0, 128.8, 127.7, 127.6, 126.8, 118.9, 110.3, 108.0, 68.6; HRMS (ESI) *m/z* 226.0857 (M+H<sup>+</sup>), calc. for C<sub>14</sub>H<sub>12</sub>NO<sub>2</sub> 226.0868.

The ee was determined by HPLC analysis: CHIRAL INB (4.6 mm i.d. x 250 mm); Hexane/2-propanol = 90/10; flow rate 1.0 mL/min; 25 °C; 210 nm; retention time: 9.8 min (minor) and 17.9 min (major).

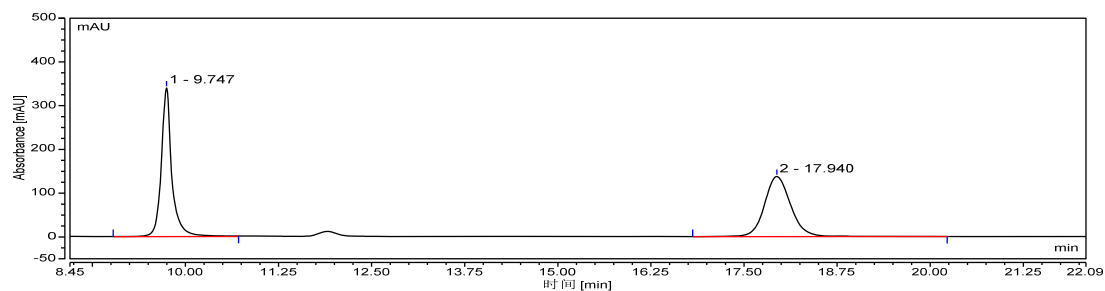

| Entry | Retention Time | Area    | Height | %Area |
|-------|----------------|---------|--------|-------|
| 1     | 9.747          | 56.3419 | 339.61 | 50.12 |
| 2     | 17.940         | 56.0624 | 137.26 | 49.88 |

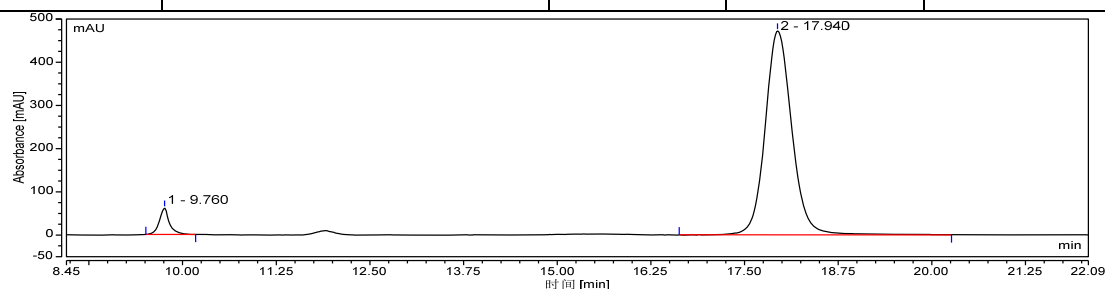

| Entry | Retention Time | Area     | Height | %Area |
|-------|----------------|----------|--------|-------|
| 1     | 9.760          | 9.3841   | 60.55  | 4.59  |
| 2     | 17.940         | 195.2839 | 471.82 | 95.41 |

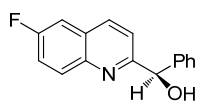

**2w**: white solid, Mp 126.3 – 127.8 °C, 20.5 mg, 81% yield, 93% ee,  $[\alpha]_D^{22}$   $-112.0$  ( $c$  1.0,  $\text{CHCl}_3$ );  $^1\text{H NMR}$  (300 MHz,  $\text{CDCl}_3$ )  $\delta$  8.21 (dd,  $J = 9.1, 5.3$  Hz, 1H), 8.06 (d,  $J = 8.6$  Hz, 1H), 7.58 (td,  $J = 8.9, 2.7$  Hz, 1H), 7.47 (dd,  $J = 6.5, 4.8$  Hz, 3H), 7.38 (m, 3H), 7.30 (d,  $J = 7.0$  Hz, 1H), 6.05–5.60 (s, 2H);  $^{13}\text{C NMR}$  (75 MHz,  $\text{CDCl}_3$ )  $\delta$  160.6 (d,  $J = 248.2$  Hz), 160.0 (d,  $J = 2.6$  Hz), 142.9, 142.5, 136.5 (d,  $J = 5.1$  Hz), 131.1 (d,  $J = 9.0$  Hz), 128.7, 128.1 (d,  $J = 10.0$  Hz), 128.1, 127.4, 120.1, 120.1 (d,  $J = 25.5$  Hz), 110.8 (d,  $J = 21.8$  Hz), 75.1; HRMS (ESI)  $m/z$  254.0981 ( $\text{M}+\text{H}^+$ ), calc. for  $\text{C}_{16}\text{H}_{13}\text{FNO}$  254.0981.

The ee was determined by HPLC analysis: CHIRAL INB (4.6 mm i.d. x 250 mm); Hexane/2-propanol = 90/10; flow rate 1.0 mL/min; 25 °C; 254 nm; retention time: 9.2 min (minor) and 10.0 min (major).

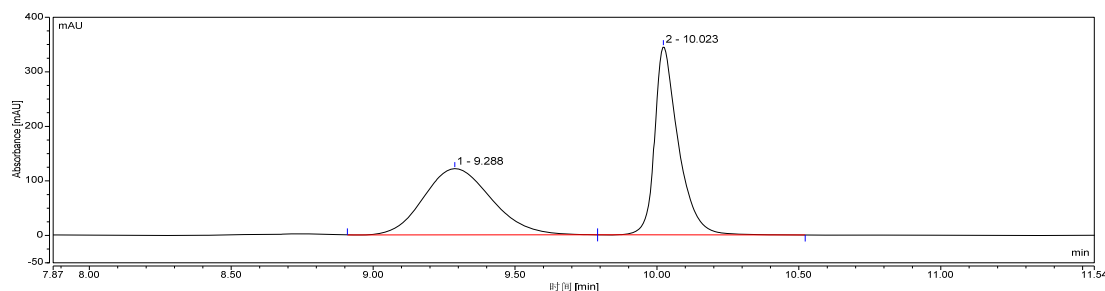

| Entry | Retention Time | Area    | Height | %Area |
|-------|----------------|---------|--------|-------|
| 1     | 9.288          | 33.6752 | 121.40 | 50.21 |
| 2     | 10.023         | 33.3970 | 345.08 | 49.79 |



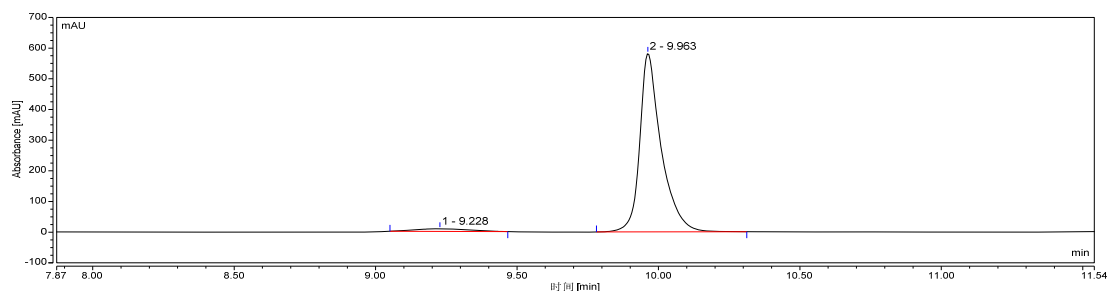

| Entry | Retention Time | Area    | Height | %Area |
|-------|----------------|---------|--------|-------|
| 1     | 9.228          | 1.9593  | 8.64   | 3.70  |
| 2     | 9.963          | 51.0475 | 581.83 | 96.30 |

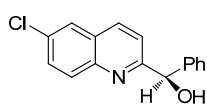

**2x**: white solid, Mp 81.9 – 82.9 °C, 23.7 mg, 88% yield, 93% ee,  $[\alpha]_D^{22}$   $-26.7$  (c 1.0,  $\text{CHCl}_3$ );  $^1\text{H}$  NMR (300 MHz,  $\text{CDCl}_3$ )  $\delta$  8.08 (d,  $J = 8.9$  Hz, 1H), 7.96 (d,  $J = 8.6$  Hz, 1H), 7.78 (d,  $J = 2.1$  Hz, 1H), 7.69 (dd,  $J = 8.9$ , 2.2 Hz, 1H), 7.34 (tt,  $J = 13.2$ , 5.4 Hz, 5H), 7.22 (d,  $J = 8.6$  Hz, 1H), 5.87 (s, 2H);  $^{13}\text{C}$  NMR (75 MHz,  $\text{CDCl}_3$ )  $\delta$  160.9, 144.4, 142.4, 136.1, 132.4, 130.8, 130.4, 128.7, 128.1, 128.1, 127.4, 126.3, 120.2, 75.2; HRMS (ESI)  $m/z$  270.0695 ( $\text{M}+\text{H}^+$ ), calc. for  $\text{C}_{16}\text{H}_{13}\text{ClNO}$  270.0686.

The ee was determined by HPLC analysis: CHIRAL INB (4.6 mm i.d. x 250 mm); Hexane/2-propanol = 90/10; flow rate 1.0 mL/min; 25 °C; 230 nm; retention time: 9.2 min (minor) and 12.0 min (major).

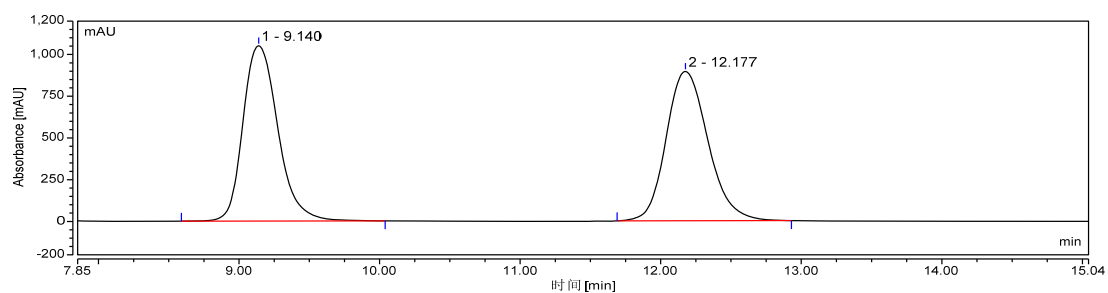

| Entry | Retention Time | Area     | Height  | %Area |
|-------|----------------|----------|---------|-------|
| 1     | 9.140          | 302.5506 | 1049.59 | 49.53 |
| 2     | 12.177         | 308.3333 | 894.04  | 50.47 |

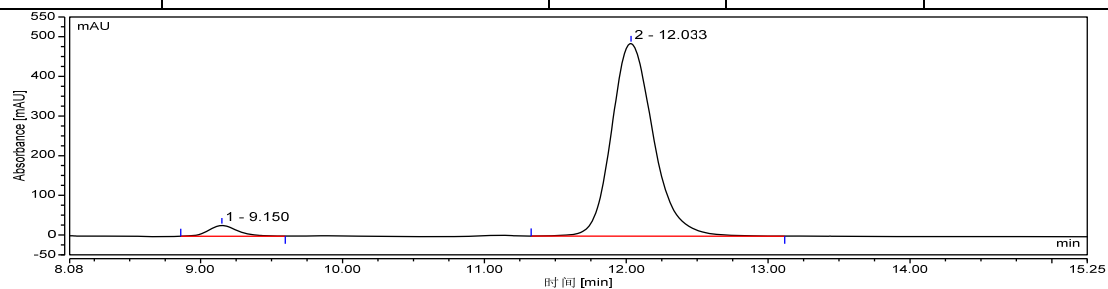

| Entry | Retention Time | Area     | Height | %Area |
|-------|----------------|----------|--------|-------|
| 1     | 9.150          | 6.4377   | 26.93  | 3.73  |
| 2     | 12.033         | 165.9802 | 485.67 | 96.27 |

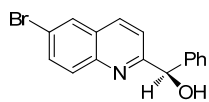

**2y**: white solid, Mp 97.6 – 99.2 °C, 29.1 mg, 93% yield, 95% ee,  $[\alpha]_D^{22}$  –41.2 (*c* 1.0, CHCl<sub>3</sub>); <sup>1</sup>H NMR (300 MHz, CDCl<sub>3</sub>) δ 8.05 – 7.90 (m, 3H), 7.81 (dd, *J* = 8.9, 2.1 Hz, 1H), 7.35 (ddd, *J* = 23.7, 10.7, 6.8 Hz, 5H), 7.21 (d, *J* = 8.6 Hz, 1H), 5.86 (s, 2H); <sup>13</sup>C NMR (75 MHz, CDCl<sub>3</sub>) δ 161.1, 144.6, 142.4, 136.0, 133.4, 130.5, 129.6, 128.7, 128.6, 128.1, 127.4, 120.4, 120.2, 75.2; HRMS (ESI) *m/z* 314.0180 (M+H<sup>+</sup>), calc. for C<sub>16</sub>H<sub>13</sub>BrNO 314.0181.

The ee was determined by HPLC analysis: CHIRAL INB (4.6 mm i.d. x 250 mm); Hexane/2-propanol = 90/10; flow rate 1.0 mL/min; 25 °C; 230 nm; retention time: 8.8 min (minor) and 12.2 min (major).

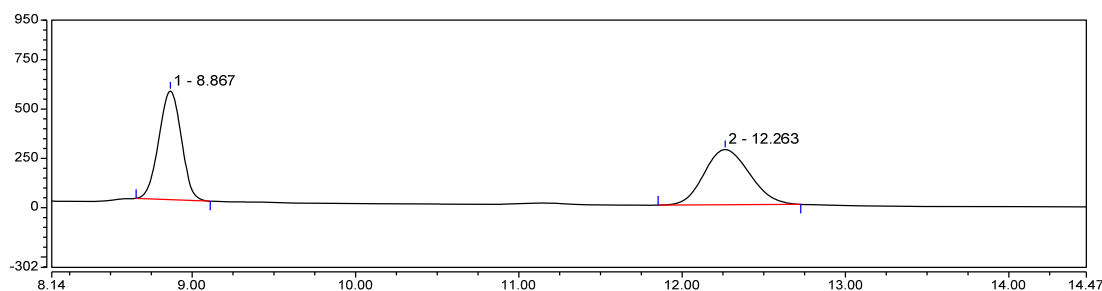

| Entry | Retention Time | Area    | Height | %Area |
|-------|----------------|---------|--------|-------|
| 1     | 8.867          | 87.7239 | 549.79 | 49.25 |
| 2     | 12.263         | 90.3805 | 279.50 | 50.75 |

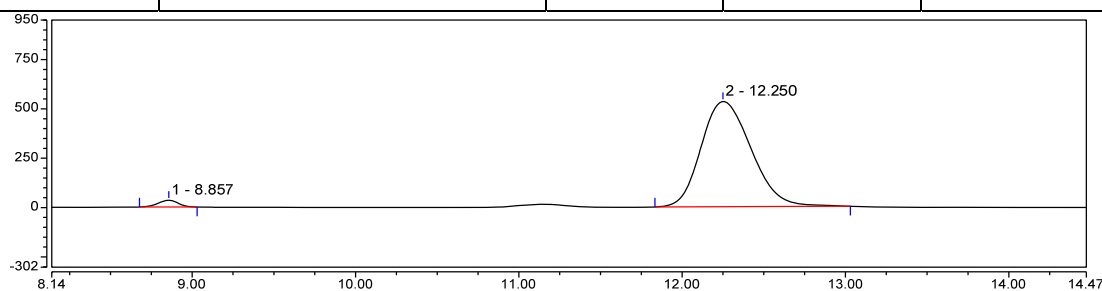

| Entry | Retention Time | Area     | Height | %Area |
|-------|----------------|----------|--------|-------|
| 1     | 8.857          | 4.8913   | 34.41  | 2.52  |
| 2     | 12.250         | 189.3481 | 532.81 | 97.48 |

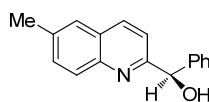

**2za**: white solid, Mp 122.3 – 124.8 °C, 22.7 mg, 91% yield, 83% ee,  $[\alpha]_D^{22}$  –171.8 (*c* 1.0, CHCl<sub>3</sub>); <sup>1</sup>H NMR (300 MHz, CDCl<sub>3</sub>) δ 8.04 (d, *J* = 8.4 Hz,

1H), 7.96 (d,  $J = 8.5$  Hz, 1H), 7.58 (d,  $J = 10.8$  Hz, 2H), 7.41 (d,  $J = 7.3$  Hz, 2H), 7.32 (dt,  $J = 8.4, 6.8$  Hz, 3H), 7.14 (d,  $J = 8.5$  Hz, 1H), 6.12 (s, 1H), 5.86 (s, 1H), 2.54 (s, 3H);  $^{13}\text{C}$  NMR (75 MHz,  $\text{CDCl}_3$ )  $\delta$  159.4, 144.4, 142.9, 136.5, 136.4, 132.1, 128.6, 128.4, 127.9, 127.5, 127.4, 126.5, 119.2, 75.0, 21.5; HRMS (ESI)  $m/z$  272.1043 ( $\text{M}+\text{Na}^+$ ), calc. for  $\text{C}_{17}\text{H}_{15}\text{NONa}$  272.1051.

The ee was determined by HPLC analysis: CHIRAL INB (4.6 mm i.d. x 250 mm); Hexane/2-propanol = 90/10; flow rate 1.0 mL/min; 25 °C; 254 nm; retention time: 6.7 min (minor) and 9.8 min (major).

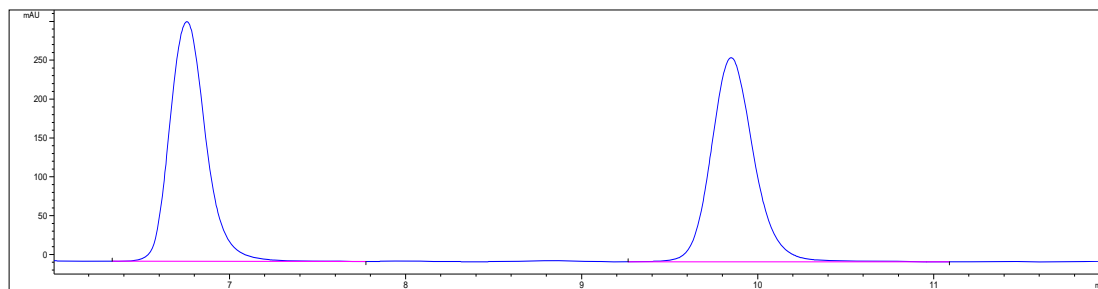

| Entry | Retention Time | Area   | Height | %Area  |
|-------|----------------|--------|--------|--------|
| 1     | 6.759          | 4403.9 | 308.5  | 49.876 |
| 2     | 9.851          | 4425.7 | 262.5  | 50.124 |

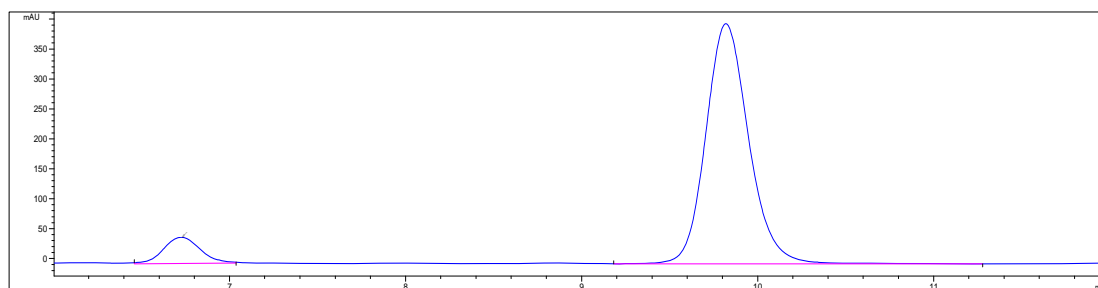

| Entry | Retention Time | Area   | Height | %Area  |
|-------|----------------|--------|--------|--------|
| 1     | 6.73           | 633.1  | 43.8   | 8.544  |
| 2     | 9.821          | 6776.1 | 401    | 91.456 |

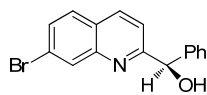

**2zb**: white solid, Mp 106.3 – 107.4 °C, 26.0 mg, 83% yield, 94% ee,  $[\alpha]_{\text{D}}^{22}$   $-66.4$  ( $c$  1.0,  $\text{CHCl}_3$ );  $^1\text{H}$  NMR (300 MHz,  $\text{CDCl}_3$ )  $\delta$  8.34 (s, 1H), 8.02 (d,  $J = 8.5$  Hz, 1H), 7.64 (m, 2H), 7.34 (tt,  $J = 10.5, 5.7$  Hz, 5H), 7.21 (d,  $J = 8.5$  Hz, 1H), 6.12–5.62 (m, 2H);  $^{13}\text{C}$  NMR (75 MHz,  $\text{CDCl}_3$ )  $\delta$  161.6, 146.5, 142.4, 137.0, 131.1, 130.2, 128.8, 128.7, 128.1, 127.4, 126.1, 124.1, 119.6, 75.2; HRMS (ESI)  $m/z$  314.0183 ( $\text{M}+\text{H}^+$ ), calc. for  $\text{C}_{16}\text{H}_{13}\text{BrNO}$  314.0181.

The ee was determined by HPLC analysis: CHIRAL INB (4.6 mm i.d. x 250 mm); Hexane/2-propanol = 90/10; flow rate 1.0 mL/min; 25 °C; 254 nm; retention time: 9.6 min (minor) and 12.0 min (major).

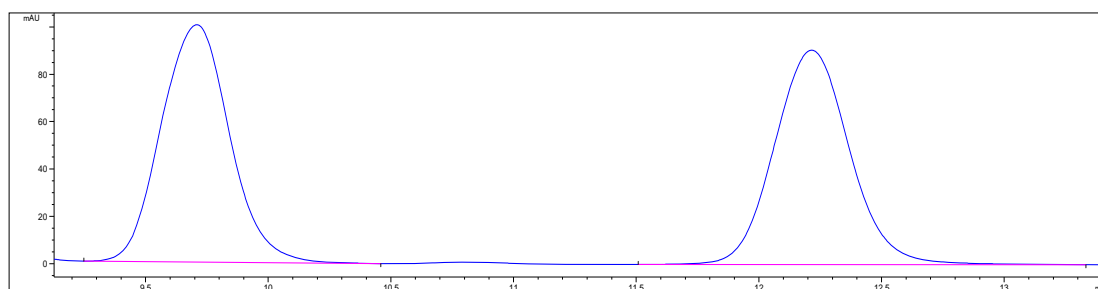

| Entry | Retention Time | Area   | Height | %Area  |
|-------|----------------|--------|--------|--------|
| 1     | 9.706          | 1944   | 100.3  | 50.162 |
| 2     | 12.213         | 1931.4 | 90.6   | 49.838 |

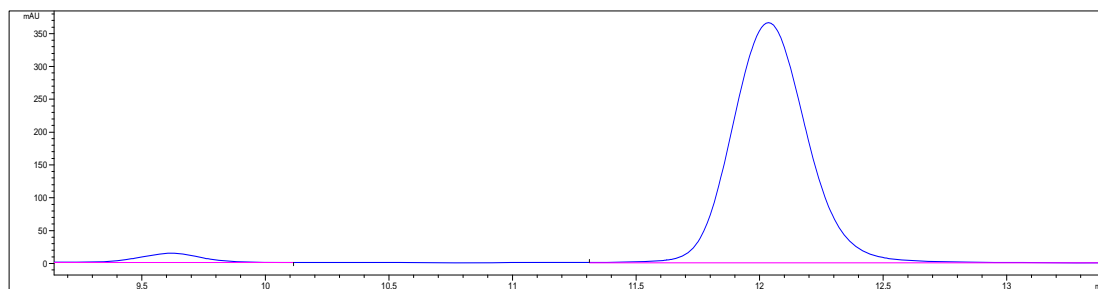

| Entry | Retention Time | Area   | Height | %Area  |
|-------|----------------|--------|--------|--------|
| 1     | 9.621          | 248.7  | 14.1   | 3.116  |
| 2     | 12.035         | 7734.7 | 365.9  | 96.884 |

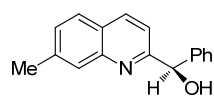

**2zc**: white solid, Mp 119.8 – 121.3 °C, 22.2 mg, 89% yield, 83% ee,  $[\alpha]_D^{22}$   $-173.8$  ( $c$  1.0,  $\text{CHCl}_3$ );  $^1\text{H}$  NMR (300 MHz,  $\text{CDCl}_3$ )  $\delta$  8.00 (d,  $J = 8.5$  Hz, 1H), 7.94 (s, 1H), 7.69 (d,  $J = 8.3$  Hz, 1H), 7.34 (m, 6H), 7.11 (d,  $J = 8.5$  Hz, 1H), 6.15 (s, 1H), 5.86 (s, 1H), 2.60 (s, 3H);  $^{13}\text{C}$  NMR (75 MHz,  $\text{CDCl}_3$ )  $\delta$  160.3, 146.1, 142.9, 140.4, 136.8, 128.8, 128.6, 127.9, 127.8, 127.4, 127.2, 125.5, 118.4, 75.0, 21.9; HRMS (ESI)  $m/z$  272.1055 ( $\text{M} + \text{Na}^+$ ), calc. for  $\text{C}_{17}\text{H}_{15}\text{NONa}$  272.1051.

The ee was determined by HPLC analysis: CHIRAL INB (4.6 mm i.d. x 250 mm); Hexane/2-propanol = 80/20; flow rate 1.0 mL/min; 25 °C; 230 nm; retention time: 6.1 min (minor) and 14.2 min (major).

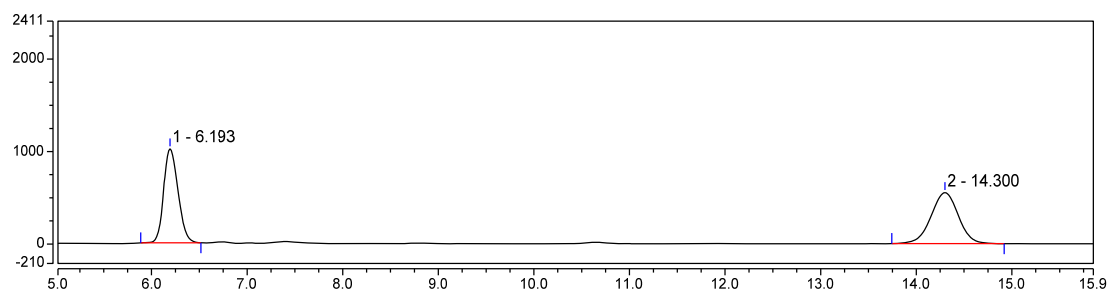

| Entry | Retention Time | Area     | Height  | %Area |
|-------|----------------|----------|---------|-------|
| 1     | 6.193          | 176.8414 | 1015.93 | 49.29 |
| 2     | 14.300         | 181.9184 | 550.93  | 50.71 |

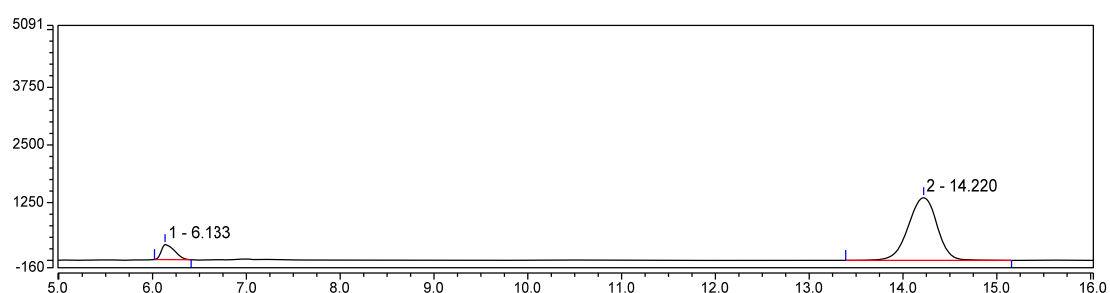

| Entry | Retention Time | Area    | Height   | %Area |
|-------|----------------|---------|----------|-------|
| 1     | 6.133          | 299.26  | 44.5724  | 8.45  |
| 2     | 14.220         | 1356.13 | 483.0176 | 91.55 |

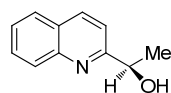

**2zd**: yellow solid, Mp 84.0 – 85.2 °C, 10.2 mg, 59% yield, 68% ee,  $[\alpha]_D^{22} +18.1$  (*c* 1.0, CHCl<sub>3</sub>); <sup>1</sup>H NMR (300 MHz, CDCl<sub>3</sub>) δ 8.16 (d, *J* = 8.5 Hz, 1H), 8.08 (d, *J* = 8.5 Hz, 1H), 7.83 (d, *J* = 8.1 Hz, 1H), 7.73 (dd, *J* = 11.2, 4.2 Hz, 1H), 7.54 (t, *J* = 7.4 Hz, 1H), 7.35 (d, *J* = 8.5 Hz, 1H), 5.16 – 4.96 (m, 2H), 1.58 (d, *J* = 6.5 Hz, 3H); <sup>13</sup>C NMR (75 MHz, CDCl<sub>3</sub>) δ 162.8, 146.3, 137.0, 129.8, 128.7, 127.6, 127.4, 126.4, 118.0, 68.7, 24.1; HRMS (ESI) *m/z* 196.0740 (M+Na<sup>+</sup>), calc. for C<sub>11</sub>H<sub>11</sub>NONa 196.0738.

The ee was determined by HPLC analysis: CHIRAL INB (4.6 mm i.d. x 250 mm); Hexane/2-propanol = 90/10; flow rate 1.0 mL/min; 25 °C; 210 nm; retention time: 6.9 min (minor) and 11.3 min (major).

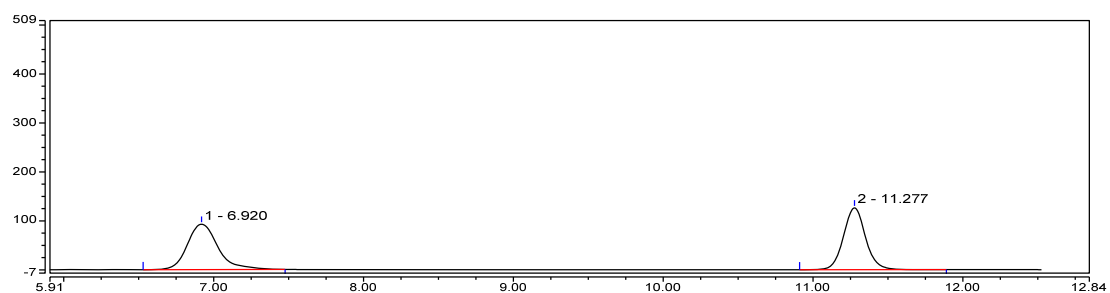

| Entry | Retention Time | Area    | Height | %Area |
|-------|----------------|---------|--------|-------|
| 1     | 6.920          | 21.9630 | 92.68  | 50.48 |
| 2     | 11.277         | 21.5452 | 126.36 | 49.52 |

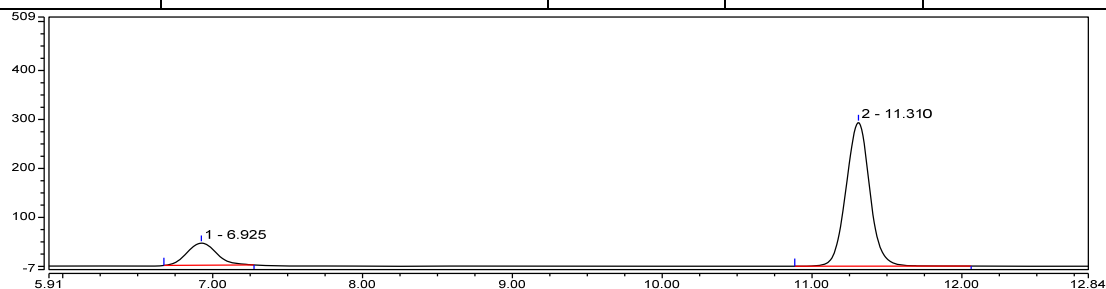

| Entry | Retention Time | Area    | Height | %Area |
|-------|----------------|---------|--------|-------|
| 1     | 6.925          | 10.4176 | 45.19  | 16.21 |
| 2     | 11.310         | 53.8548 | 293.37 | 83.79 |

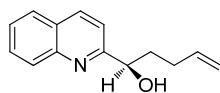

**2ze**: yellow solid, Mp 64.3 – 66.4 °C, 13.2 mg, 62% yield, 88% ee,  $[\alpha]_D^{22}$  –26.3 (*c* 1.0, CHCl<sub>3</sub>); <sup>1</sup>H NMR (300 MHz, CDCl<sub>3</sub>) δ 8.14 (d, *J* = 8.5 Hz, 1H), 8.08 (d, *J* = 8.5 Hz, 1H), 7.82 (d, *J* = 8.1 Hz, 1H), 7.72 (t, *J* = 7.7 Hz, 1H), 7.54 (t, *J* = 7.5 Hz, 1H), 7.34 (d, *J* = 8.5 Hz, 1H), 5.87 (ddt, *J* = 16.9, 10.2, 6.6 Hz, 1H), 5.21 – 4.82 (m, 4H), 2.40 – 2.12 (m, 2H), 2.11 – 1.97 (m, 1H), 1.90 – 1.74 (m, 1H); <sup>13</sup>C NMR (75 MHz, CDCl<sub>3</sub>) δ 161.9, 146.3, 138.2, 137.0, 129.8, 128.6, 127.6, 127.4, 126.4, 118.3, 114.8, 72.0, 37.4, 29.4; HRMS (ESI) *m/z* 214.1241 (M+H<sup>+</sup>), calc. for C<sub>14</sub>H<sub>16</sub>NO 214.1232.

The ee was determined by HPLC analysis: CHIRAL INB (4.6 mm i.d. x 250 mm); Hexane/2-propanol = 90/10; flow rate 1.0 mL/min; 25 °C; 254 nm; retention time: 6.8 min (minor) and 11.4 min (major).

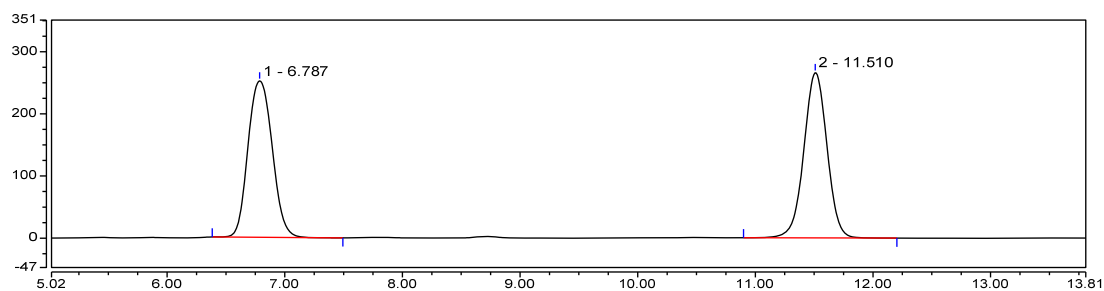

| Entry | Retention Time | Area    | Height | %Area |
|-------|----------------|---------|--------|-------|
| 1     | 6.787          | 60.1046 | 251.73 | 49.76 |
| 2     | 11.510         | 60.6760 | 266.08 | 50.24 |

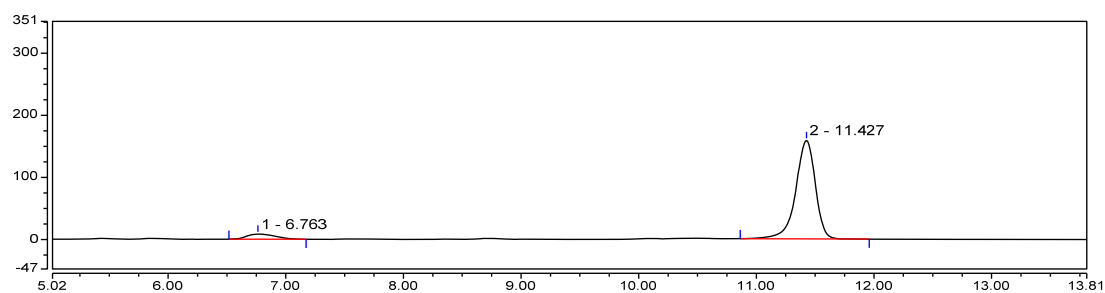

| Entry | Retention Time | Area    | Height | %Area |
|-------|----------------|---------|--------|-------|
| 1     | 6.763          | 1.9223  | 7.70   | 5.96  |
| 2     | 11.427         | 30.3479 | 158.09 | 94.04 |

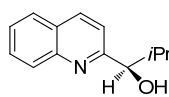

**2zf**: yellow oil, 13.9 mg, 69% yield, 88% ee,  $[\alpha]_D^{22} +13.8$  (*c* 1.0, CHCl<sub>3</sub>); <sup>1</sup>H NMR (300 MHz, CDCl<sub>3</sub>) δ 8.12 (dd, *J* = 14.6, 8.5 Hz, 2H), 7.83 (d, *J* = 8.1 Hz, 1H), 7.77 – 7.67 (m, 1H), 7.54 (t, *J* = 7.1 Hz, 1H), 7.33 (d, *J* = 8.5 Hz, 1H), 4.91 (s, 1H), 4.77 (s, 1H), 2.18 (dtd, *J* = 13.6, 6.8, 3.8 Hz, 1H), 1.14 (d, *J* = 6.9 Hz, 3H), 0.75 (d, *J* = 6.8 Hz, 3H); <sup>13</sup>C NMR (75 MHz, CDCl<sub>3</sub>) δ 161.5, 146.2, 136.7, 129.8, 128.7, 127.6, 127.4, 126.4, 118.8, 34.8, 19.9, 15.5; HRMS (ESI) *m/z* 202.1237 (M+H<sup>+</sup>), calc. for C<sub>13</sub>H<sub>16</sub>NO 202.1232.

The ee was determined by HPLC analysis: CHIRAL INB (4.6 mm i.d. x 250 mm); Hexane/2-propanol = 90/10; flow rate 1.0 mL/min; 25 °C; 210 nm; retention time: 6.5 min (major) and 9.2 min (minor).

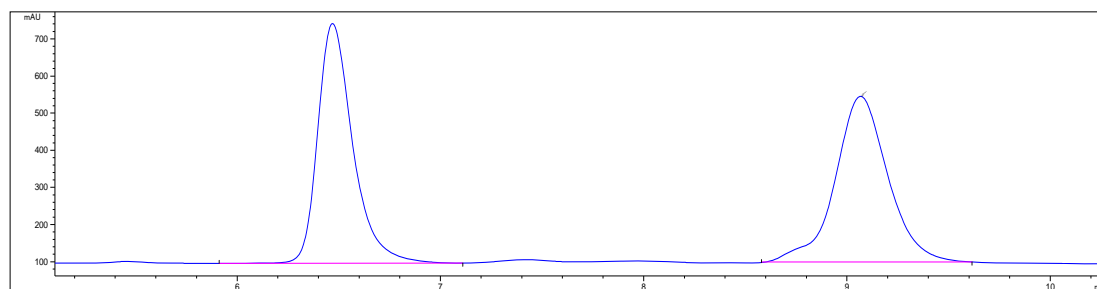

| Entry | Retention Time | Area   | Height | %Area  |
|-------|----------------|--------|--------|--------|
| 1     | 6.471          | 7751.1 | 645.7  | 49.059 |
| 2     | 9.069          | 8048.4 | 446.1  | 50.941 |

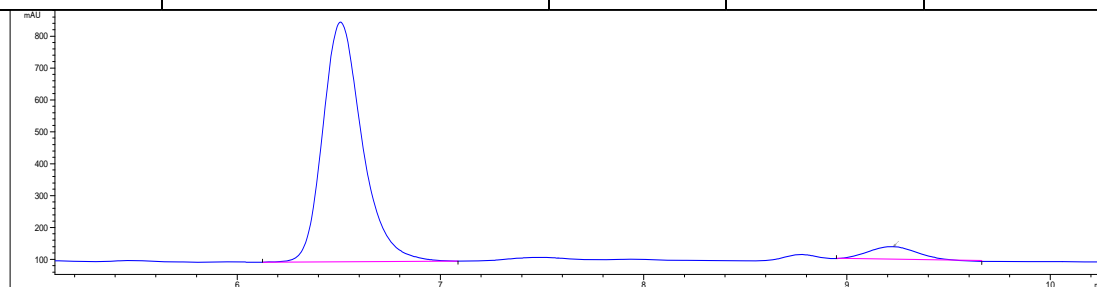

| Entry | Retention Time | Area    | Height | %Area  |
|-------|----------------|---------|--------|--------|
| 1     | 6.51           | 10107.4 | 751.4  | 94.070 |
| 2     | 9.226          | 637.2   | 39.2   | 5.930  |

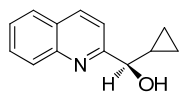

**2zg**: yellow solid, Mp 65.4 – 66.5 °C, 12.9 mg, 65% yield, 80% ee,  $[\alpha]_D^{22} +23.8$  (*c* 1.0, CHCl<sub>3</sub>); <sup>1</sup>H NMR (300 MHz, CDCl<sub>3</sub>) δ 8.11 (dd, *J* = 20.1, 8.5 Hz, 2H), 7.81 (d, *J* = 8.1 Hz, 1H), 7.71 (t, *J* = 7.4 Hz, 1H), 7.52 (t, *J* = 9.1 Hz, 2H), 5.21 (s, 1H), 4.30 (d, *J* = 7.9 Hz, 1H), 1.14 (dd, *J* = 13.1, 5.7 Hz, 1H), 0.73 – 0.52 (m, 4H); <sup>13</sup>C NMR (75 MHz, CDCl<sub>3</sub>) δ 161.6, 146.2, 136.9, 129.7, 128.7, 127.6, 127.5, 126.3, 118.6, 75.7, 17.8, 2.7, 2.4; HRMS (ESI) *m/z* 200.1073 (M+H<sup>+</sup>), calc. for C<sub>13</sub>H<sub>15</sub>NO 200.1070. The ee was determined by HPLC analysis: CHIRAL INB (4.6 mm i.d. x 250 mm); Hexane/2-propanol = 90/10; flow rate 1.0 mL/min; 25 °C; 230 nm; retention time: 7.8 min (minor) and 17.5 min (major).

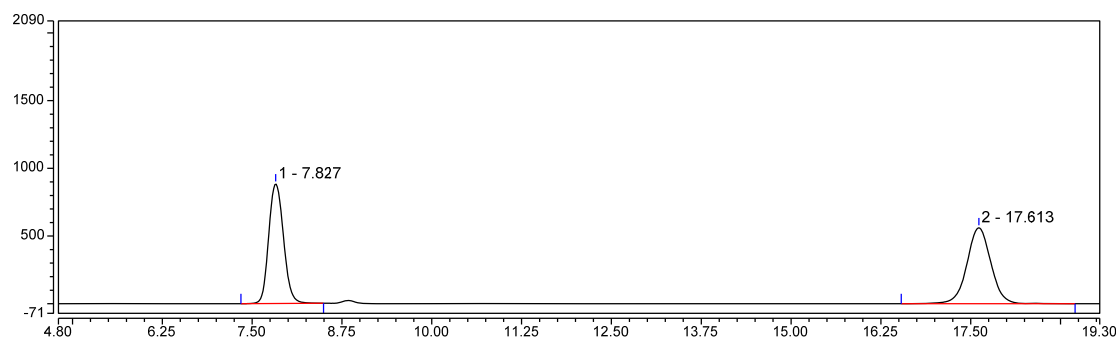

| Entry | Retention Time | Area     | Height | %Area |
|-------|----------------|----------|--------|-------|
| 1     | 7.827          | 210.8892 | 882.95 | 49.35 |
| 2     | 17.613         | 216.4143 | 560.49 | 50.65 |

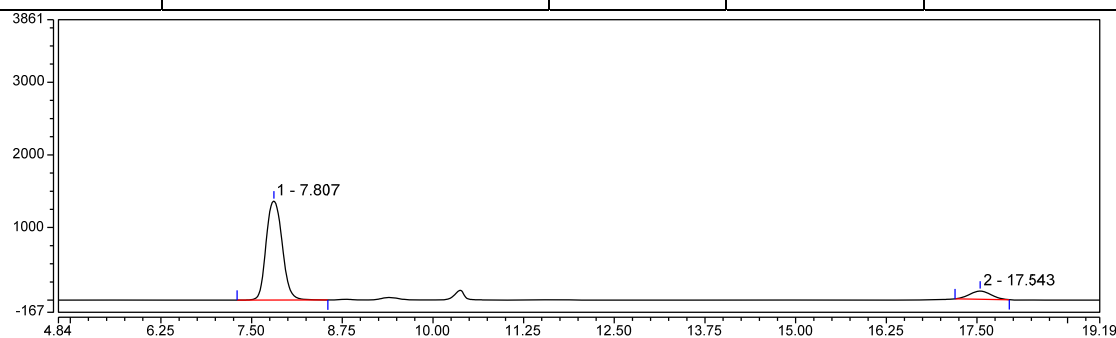

| Entry | Retention Time | Area     | Height  | %Area |
|-------|----------------|----------|---------|-------|
| 1     | 7.807          | 351.3053 | 1363.15 | 90.07 |
| 2     | 17.543         | 38.7258  | 112.43  | 9.93  |



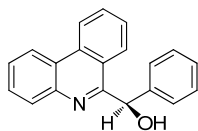

**2zh**: white solid, Mp 120.6 – 122.1 °C, 28.2 mg, 99% yield, 90% ee,  $[\alpha]_D^{22}$  –46.8 (*c* 1.0, CHCl<sub>3</sub>); <sup>1</sup>H NMR (300 MHz, CDCl<sub>3</sub>) δ 8.64 (dd, *J* = 13.2, 8.3 Hz, 2H), 8.33 (d, *J* = 7.6 Hz, 1H), 8.07 (d, *J* = 8.2 Hz, 1H), 7.80 (m, 3H), 7.59 (t, *J* = 7.6 Hz, 1H), 7.44 (d, *J* = 6.7 Hz, 2H), 7.33 (td, *J* = 8.7, 4.2 Hz, 3H), 6.64 (s, 1H), 6.46 (s, 1H); <sup>13</sup>C NMR (75 MHz, CDCl<sub>3</sub>) δ 159.0, 142.9, 141.6, 133.4, 130.9, 129.5, 129.0, 128.8, 128.0, 127.8, 127.4, 127.3, 126.0, 124.4, 123.4, 122.5, 122.1, 72.7; HRMS (ESI) *m/z* 308.1061 (M+Na<sup>+</sup>), calc. for C<sub>20</sub>H<sub>15</sub>NONa 308.1051.

The ee was determined by HPLC analysis: CHIRALPAK IE (4.6 mm i.d. x 250 mm); Hexane/2-propanol = 80/20; flow rate 1.0 mL/min; 25 °C; 210 nm; retention time: 11.7 min (major) and 14.1 min (minor).

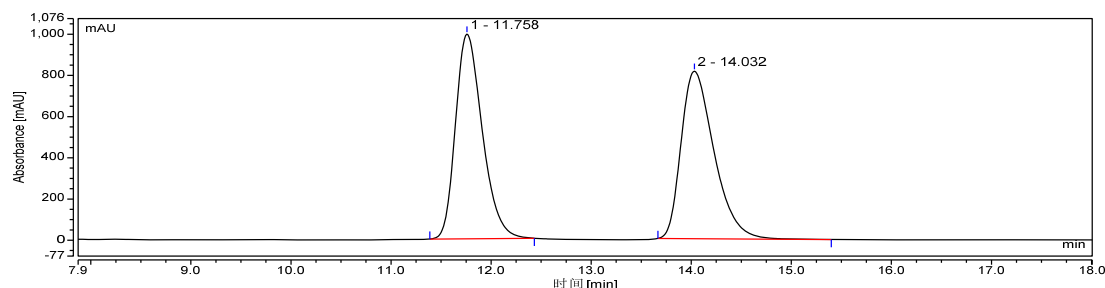

| Entry | Retention Time | Area     | Height | %Area |
|-------|----------------|----------|--------|-------|
| 1     | 11.758         | 308.2400 | 993.30 | 49.82 |
| 2     | 14.032         | 310.4418 | 813.19 | 50.18 |

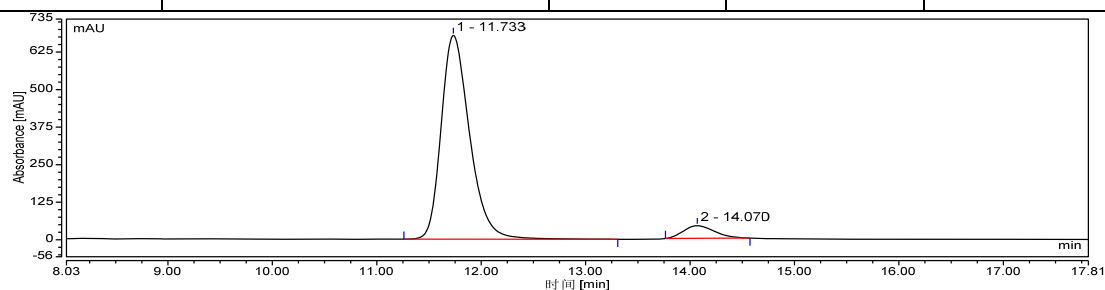

| Entry | Retention Time | Area     | Height | %Area |
|-------|----------------|----------|--------|-------|
| 1     | 11.733         | 214.0873 | 678.52 | 95.22 |
| 2     | 14.070         | 10.7580  | 36.58  | 4.78  |

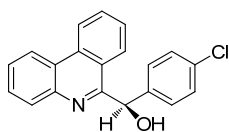

**2zi**: white solid, Mp 139.3 – 140.8 °C, 27.3 mg, 86% yield, 88% ee,  $[\alpha]_D^{22}$  –100.2 (*c* 1.0, CHCl<sub>3</sub>); <sup>1</sup>H NMR (300 MHz, CDCl<sub>3</sub>) δ 8.50 (dd, *J* = 15.5, 8.2 Hz, 2H), 8.15 (d, *J* = 7.9 Hz, 1H), 7.85 (d, *J* = 8.2 Hz, 1H), 7.66 (dt, *J* = 23.9, 7.2 Hz, 3H), 7.46 (t, *J* = 7.6 Hz, 1H), 7.19 (dd, *J* = 21.8, 8.4 Hz, 4H), 6.47 (s, 1H), 6.28 (s, 1H). <sup>13</sup>C NMR (75 MHz, CDCl<sub>3</sub>) δ 158.5, 141.6, 141.4, 133.8, 133.4, 130.9,

129.6, 129.2, 129.0, 129.0, 127.4, 127.4, 125.7, 124.4, 123.2, 122.6, 122.1, 72.0. HRMS (ESI)  $m/z$  342.0653 ( $M+Na^+$ ), calc. for  $C_{20}H_{14}NOCINa$  342.0656.

The ee was determined by HPLC analysis: CHIRALPAK IE (4.6 mm i.d. x 250 mm); Hexane/2-propanol = 60/40; flow rate 1.0 mL/min; 25 °C; 210 nm; retention time: 8.3 min (major) and 9.9 min (minor).

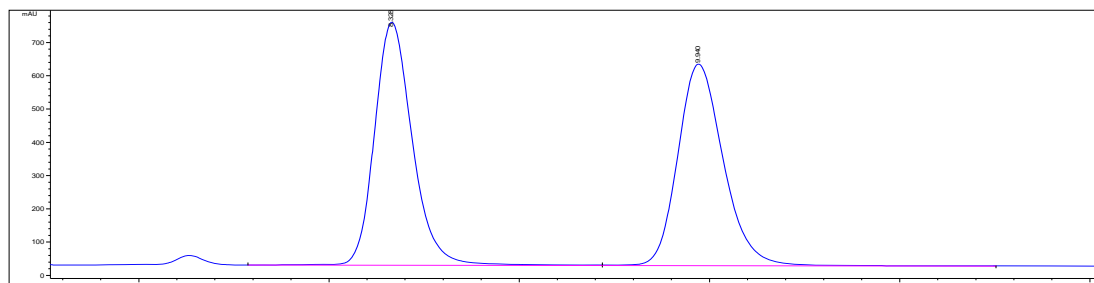

| Entry | Retention Time | Area    | Height | %Area  |
|-------|----------------|---------|--------|--------|
| 1     | 8.328          | 10127.9 | 730.1  | 50.070 |
| 2     | 9.94           | 10099.7 | 605.6  | 49.930 |

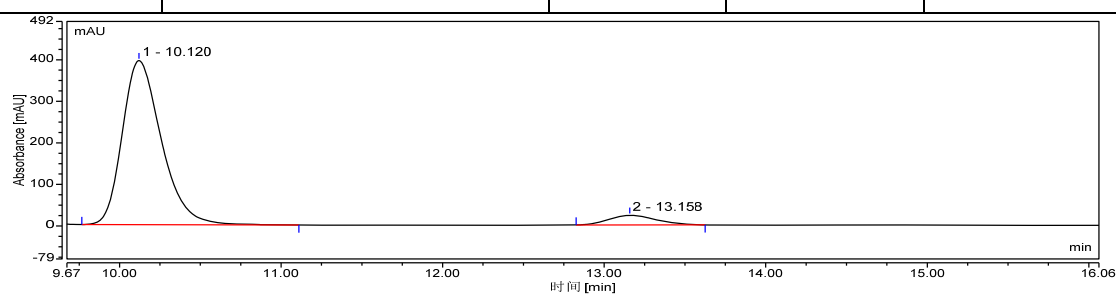

| Entry | Retention Time | Area    | Height | %Area  |
|-------|----------------|---------|--------|--------|
| 1     | 8.302          | 28960.4 | 1699.2 | 94.171 |
| 2     | 9.938          | 1792.5  | 105.9  | 5.829  |

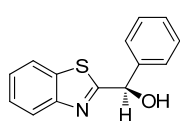

**2zj**: yellow solid, Mp 132.3 – 134.8 °C, 21.9 mg, 91% yield, 90% ee,  $[\alpha]_D^{22}$   $-13.8$  ( $c$  1.0,  $CHCl_3$ );  $^1H$  NMR (300 MHz,  $CDCl_3$ )  $\delta$  7.98 (d,  $J$  = 8.0 Hz, 1H), 7.83 (d,  $J$  = 7.9 Hz, 1H), 7.53 (d,  $J$  = 6.5 Hz, 2H), 7.50 – 7.31 (m, 5H), 6.15 (s, 1H), 3.29 (s, 1H);  $^{13}C$  NMR (75 MHz,  $CDCl_3$ )  $\delta$  175.0, 152.4, 140.9, 135.2, 128.8, 128.7, 126.7, 126.2, 125.2, 123.0, 121.8, 74.4; HRMS (ESI)  $m/z$  242.0629 ( $M+H^+$ ), calc. for  $C_{14}H_{12}NOS$  242.0634.

The ee was determined by HPLC analysis: CHIRAL INB (4.6 mm i.d. x 250 mm); Hexane/2-propanol = 90/10; flow rate 1.0 mL/min; 25 °C; 254 nm; retention time: 6.4 min (minor) and 10.7 min (major).

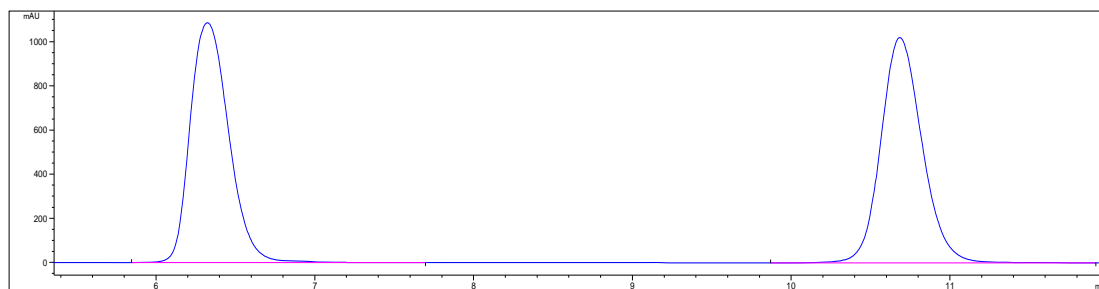

| Entry | Retention Time | Area    | Height | %Area  |
|-------|----------------|---------|--------|--------|
| 1     | 6.325          | 18336.5 | 1086.3 | 49.929 |
| 2     | 10.686         | 18389   | 1019.8 | 50.071 |

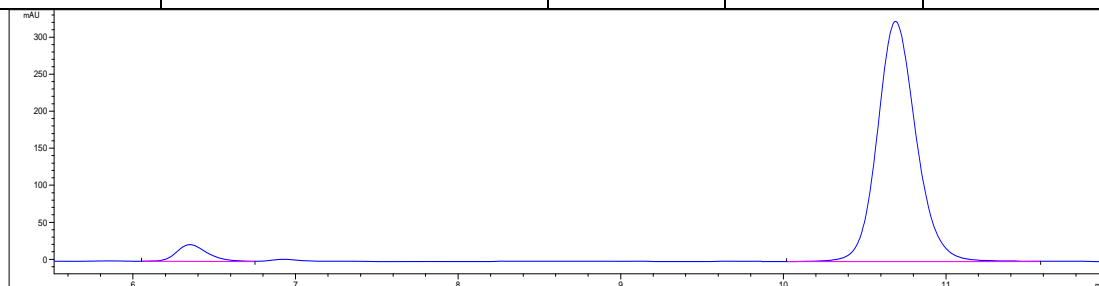

| Entry | Retention Time | Area   | Height | %Area  |
|-------|----------------|--------|--------|--------|
| 1     | 6.351          | 294    | 22.5   | 5.175  |
| 2     | 10.69          | 5387.5 | 324.2  | 94.825 |

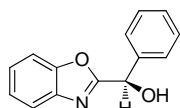

**2zk**: white solid, Mp 140.0 – 141.5 °C, 17.6 mg, 78% yield, 90% ee,  $[\alpha]_D^{22}$   $-33.8$  ( $c$  1.0,  $\text{CHCl}_3$ );  $^1\text{H}$  NMR (300 MHz,  $\text{CDCl}_3$ )  $\delta$  7.73 (dd,  $J = 6.2, 2.8$  Hz, 1H), 7.54 (d,  $J = 6.7$  Hz, 2H), 7.49 (dd,  $J = 6.3, 3.0$  Hz, 1H), 7.42 – 7.32 (m, 5H), 6.06 (s, 1H), 2.72 (s, 1H);  $^{13}\text{C}$  NMR (75 MHz,  $\text{CDCl}_3$ )  $\delta$  166.7, 151.0, 139.7, 138.6, 128.9, 128.9, 126.8, 125.5, 124.8, 120.0, 111.0, 70.5; HRMS (ESI)  $m/z$  226.0863 ( $\text{M}+\text{H}^+$ ), calc. for  $\text{C}_{14}\text{H}_{12}\text{NO}_2$  226.0857.

The ee was determined by HPLC analysis: CHIRAL INB (4.6 mm i.d. x 250 mm); Hexane/2-propanol = 90/10; flow rate 1.0 mL/min; 25 °C; 254 nm; retention time: 8.4 min (minor) and 11.4 min (major).

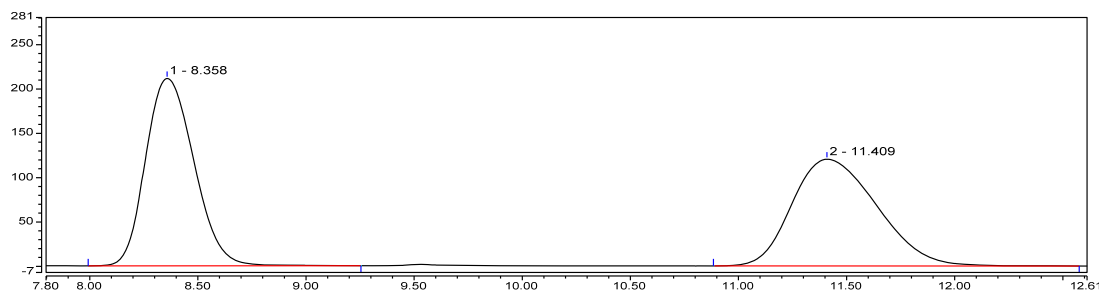

| Entry | Retention Time | Area    | Height | %Area |
|-------|----------------|---------|--------|-------|
| 1     | 8.358          | 54.7637 | 211.30 | 49.99 |
| 2     | 11.409         | 54.7953 | 120.43 | 50.01 |

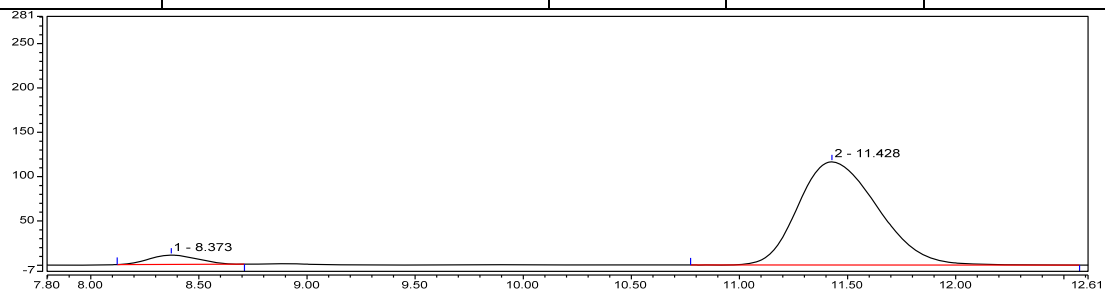

| Entry | Retention Time | Area    | Height | %Area |
|-------|----------------|---------|--------|-------|
| 1     | 8.373          | 2.7186  | 10.43  | 5.20  |
| 2     | 11.428         | 49.5751 | 116.36 | 94.80 |

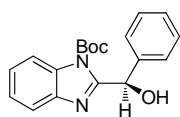

**2z1**: white solid, Mp 167.7 – 167.9 °C, 22.0 mg, 68% yield, 87% ee,  $[\alpha]_D^{22} +23.4$  (*c* 1.0, CHCl<sub>3</sub>); <sup>1</sup>H NMR (300 MHz, CDCl<sub>3</sub>) δ 7.54 (d, *J* = 3.0 Hz, 2H), 7.47 (d, *J* = 5.4 Hz, 2H), 7.31 (d, *J* = 5.4 Hz, 3H), 7.26 – 7.19 (m, 2H), 6.93 (s, 1H), 1.44 (d, *J* = 1.6 Hz, 9H); <sup>13</sup>C NMR (75 MHz, CDCl<sub>3</sub>) δ 152.1, 151.5, 136.7, 128.9, 128.8, 127.0, 122.9, 83.6, 74.6, 27.6; HRMS (ESI) *m/z* 325.1549 (M+H<sup>+</sup>), calc. for C<sub>19</sub>H<sub>21</sub>N<sub>2</sub>O<sub>3</sub> 325.1547.

The ee was determined by HPLC analysis: Cellulose-4 (4.6 mm i.d. x 250 mm); Hexane/2-propanol = 80/20; flow rate 1.0 mL/min; 25 °C; 254 nm; retention time: 11.6 min (minor) and 15.3 min (major).

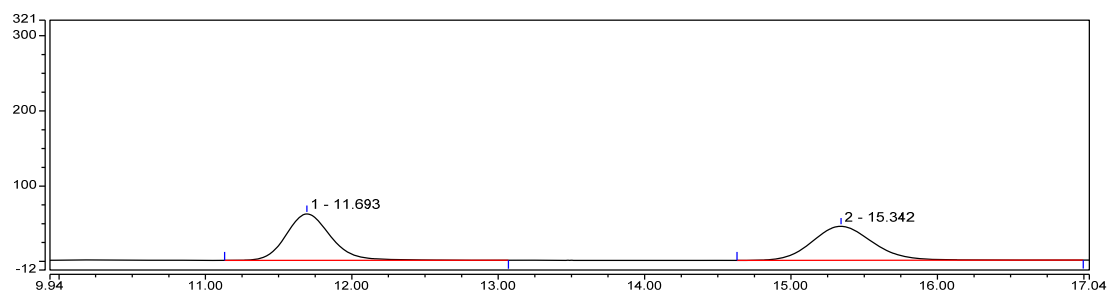

| Entry | Retention Time | Area    | Height | %Area |
|-------|----------------|---------|--------|-------|
| 1     | 8.358          | 54.7637 | 211.30 | 49.99 |
| 2     | 11.409         | 54.7953 | 120.43 | 50.01 |

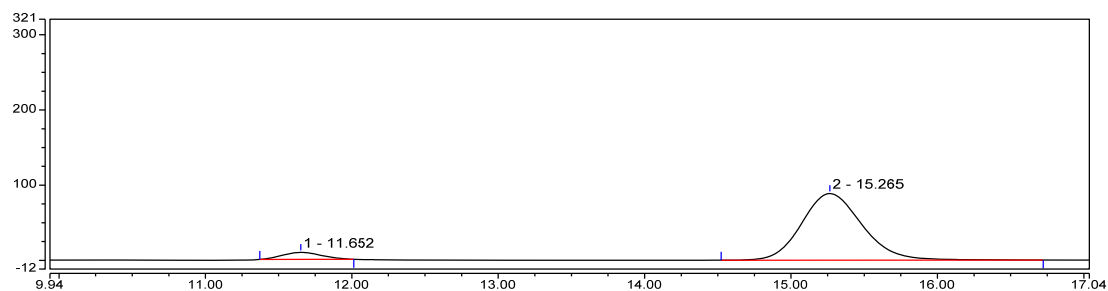

| Entry | Retention Time | Area    | Height | %Area |
|-------|----------------|---------|--------|-------|
| 1     | 11.652         | 2.8860  | 9.28   | 6.38  |
| 2     | 15.265         | 42.3220 | 88.51  | 93.62 |

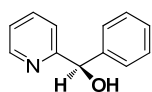

**2zm**: white solid, Mp 137.2 – 138.1 °C, 11.6 mg, 63% yield, 40% ee,  $[\alpha]_D^{22} +13.4$  ( $c$  1.0,  $\text{CHCl}_3$ );  $^1\text{H}$  NMR (300 MHz,  $\text{CDCl}_3$ )  $\delta$  8.65 (d,  $J = 4.5$  Hz, 1H), 7.71 (m, 1H), 7.41 (m, 5H), 7.27 (dd,  $J = 14.8, 7.0$  Hz, 2H), 5.85 (s, 1H), 5.04 (s, 1H);  $^{13}\text{C}$  NMR (75 MHz,  $\text{CDCl}_3$ )  $\delta$  160.8, 147.7, 143.2, 136.9, 128.5, 127.8, 127.0, 122.4, 121.4, 74.9; HRMS (ESI)  $m/z$  186.0904 ( $\text{M}+\text{H}^+$ ), calc. for  $\text{C}_{12}\text{H}_{12}\text{NO}$  186.0913.

The ee was determined by HPLC analysis: CHIRAL AD-H (4.6 mm i.d. x 250 mm); Hexane/2-propanol = 93/07; flow rate 0.8 mL/min; 25 °C; 220 nm; retention time: 17.7 min (major) and 22.6 min (minor).

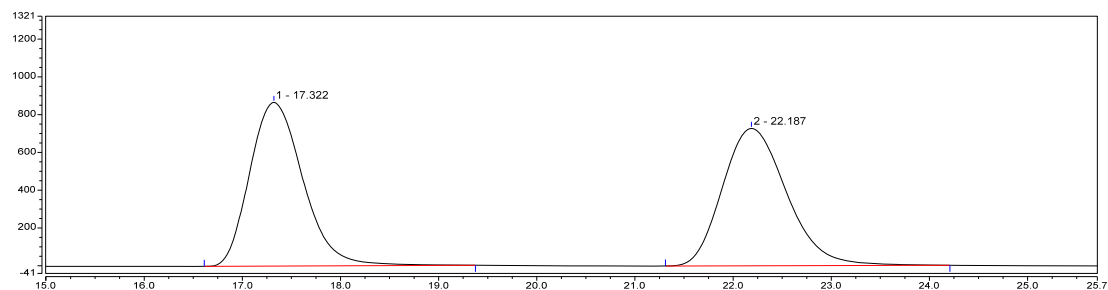

| Entry | Retention Time | Area     | Height | %Area |
|-------|----------------|----------|--------|-------|
| 1     | 17.322         | 545.1152 | 866.86 | 49.75 |
| 2     | 22.187         | 550.5359 | 727.30 | 50.25 |

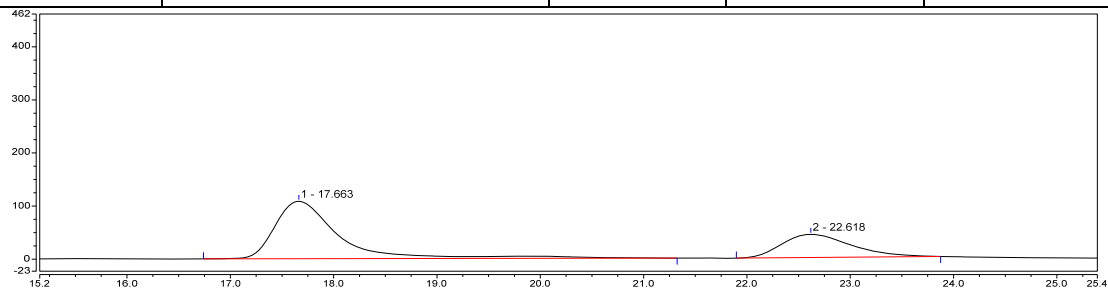

| Entry | Retention Time | Area | Height | %Area |
|-------|----------------|------|--------|-------|
|-------|----------------|------|--------|-------|

|   |        |         |        |       |
|---|--------|---------|--------|-------|
| 1 | 17.663 | 77.8796 | 108.09 | 69.82 |
| 2 | 22.618 | 33.6587 | 43.57  | 30.18 |

## 7. Copies of NMR spectra

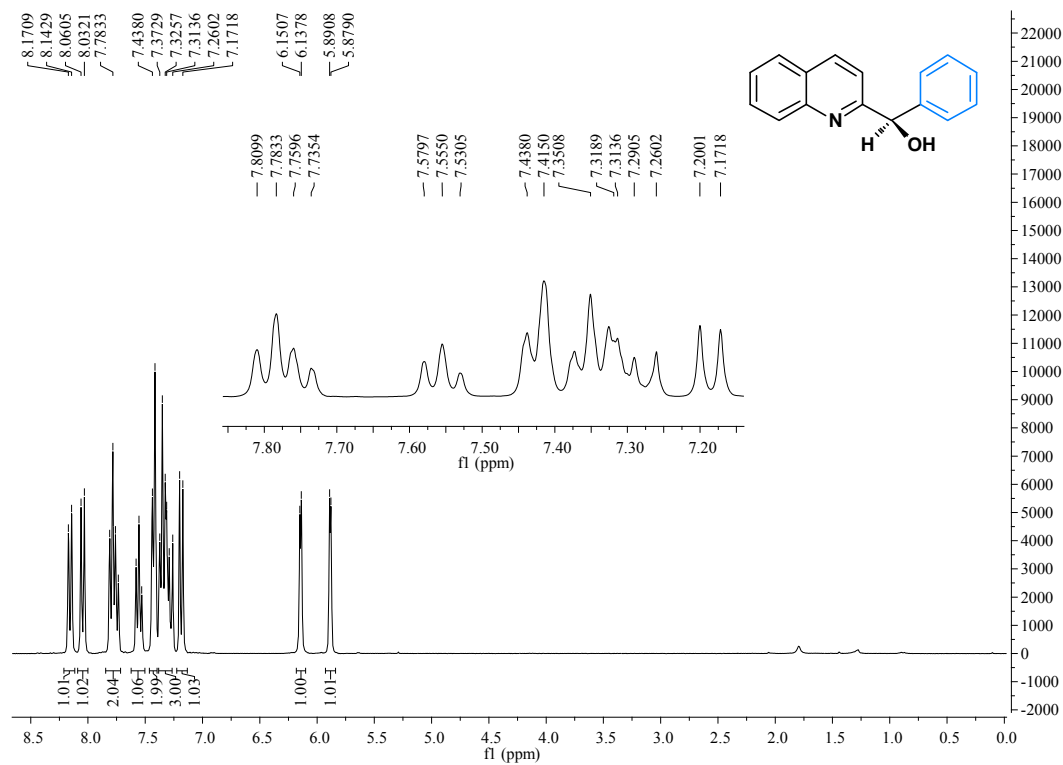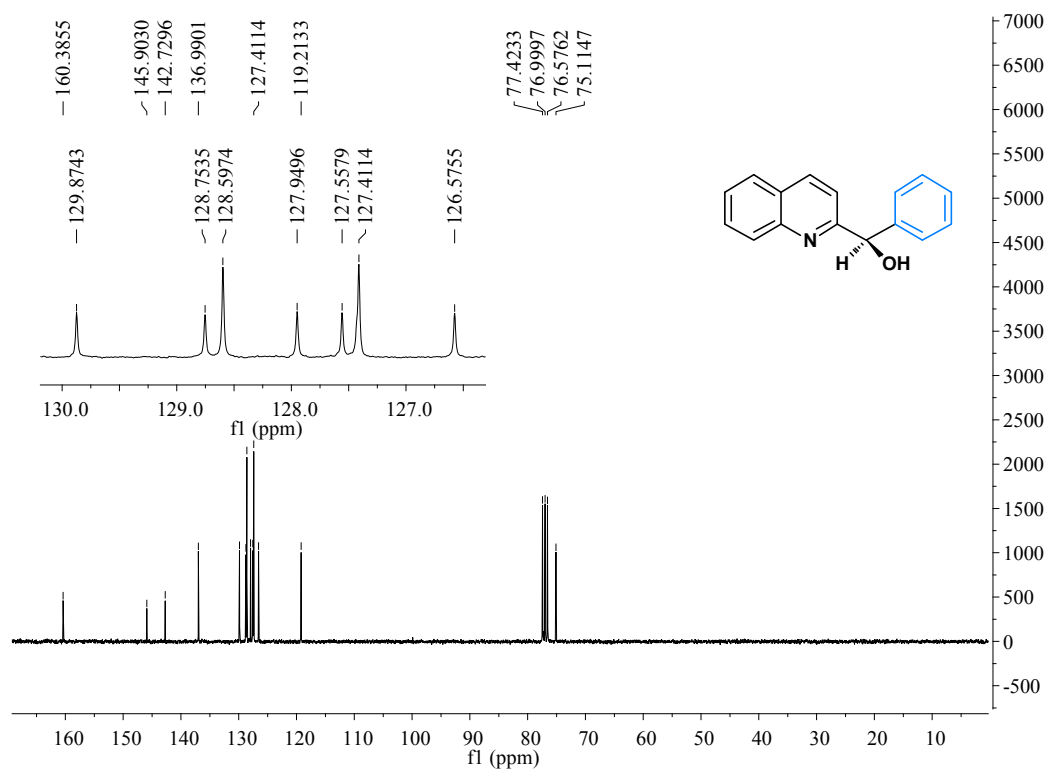

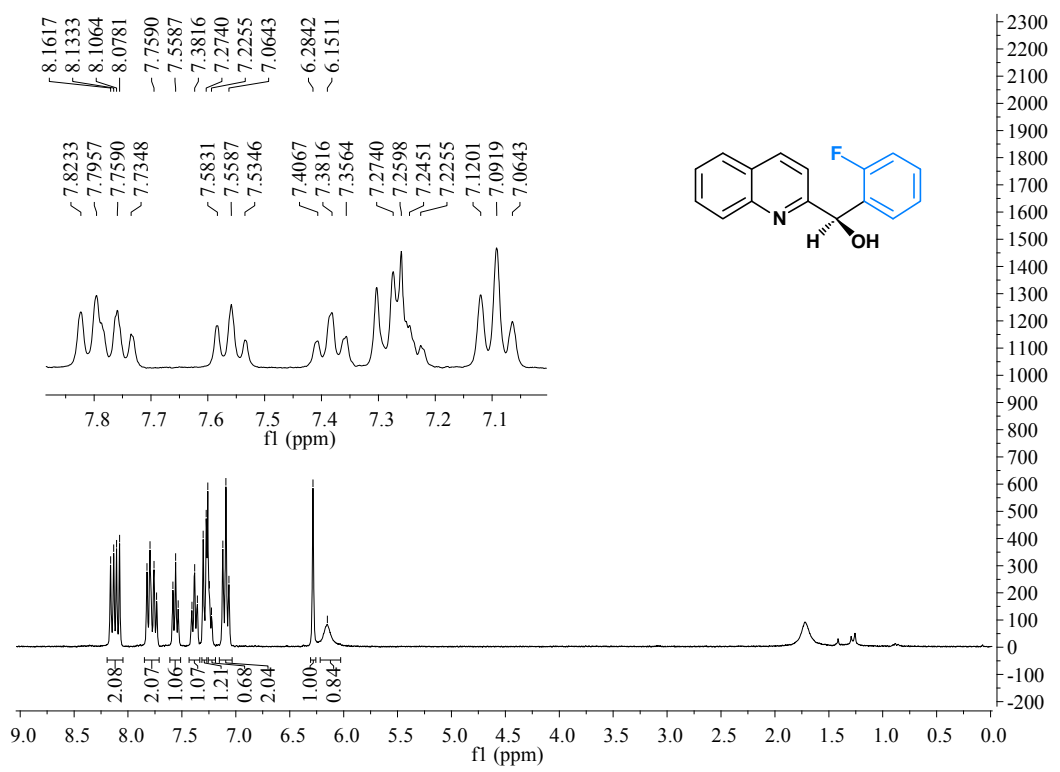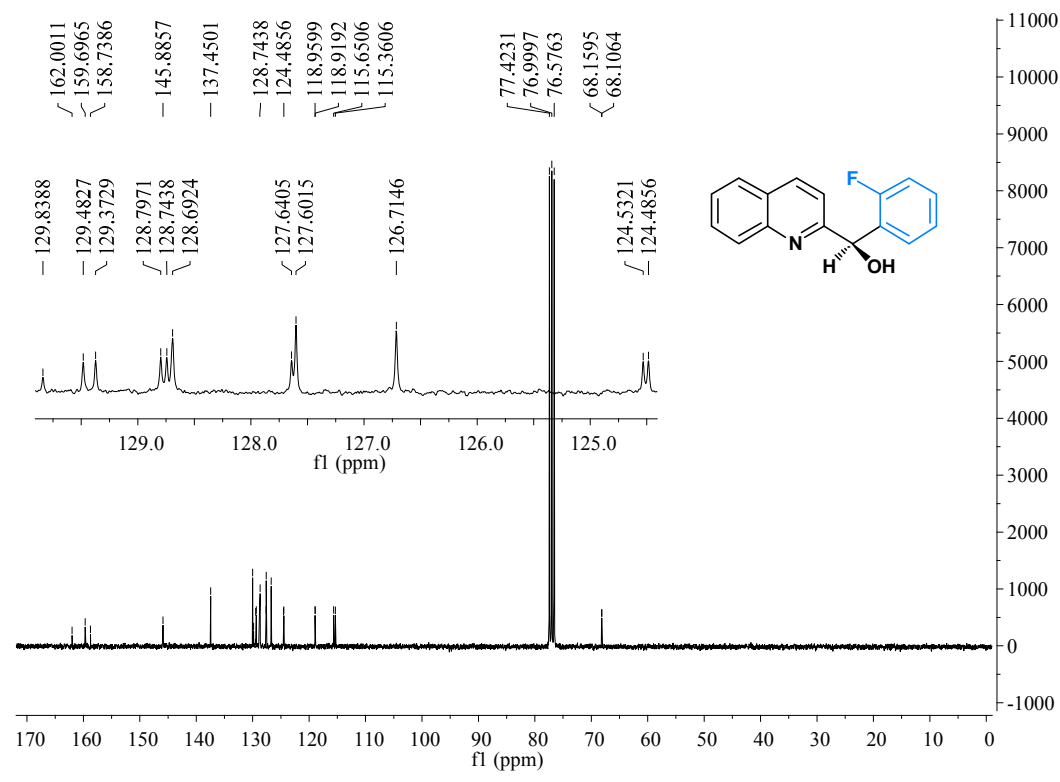



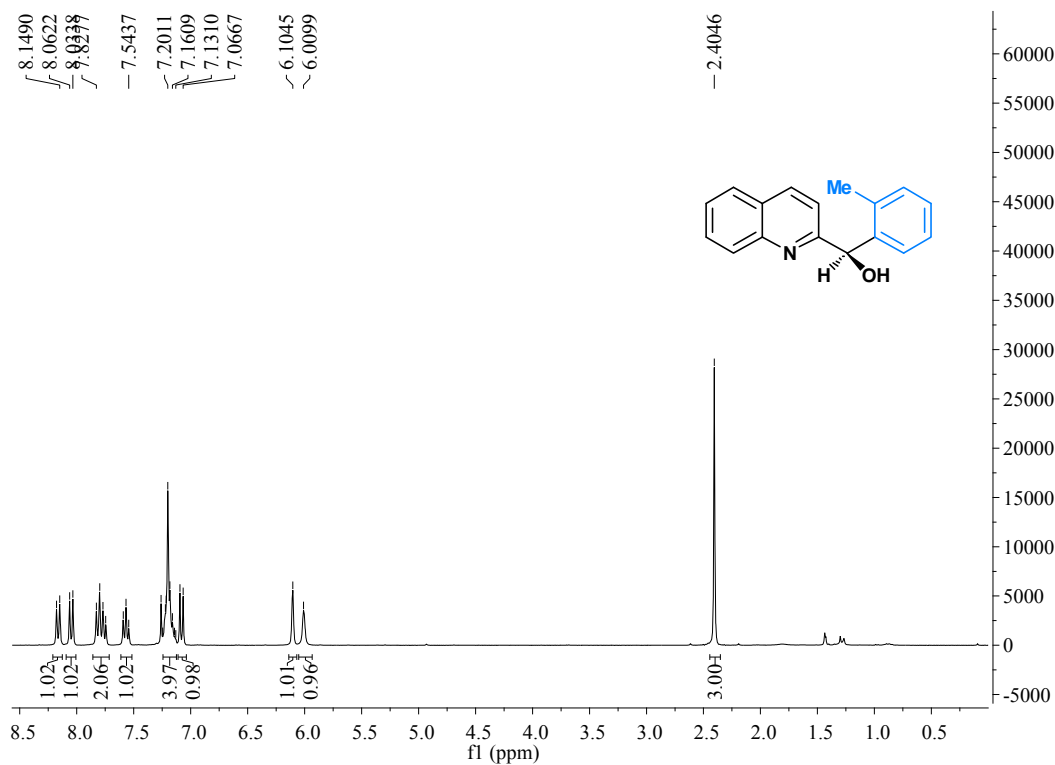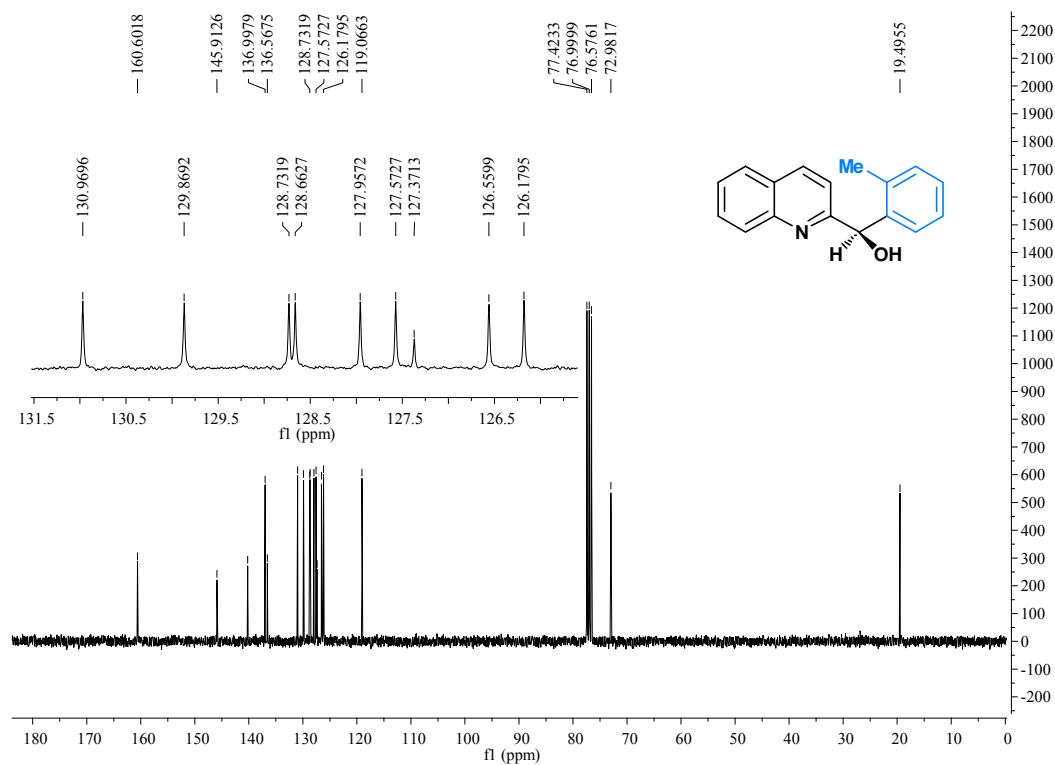

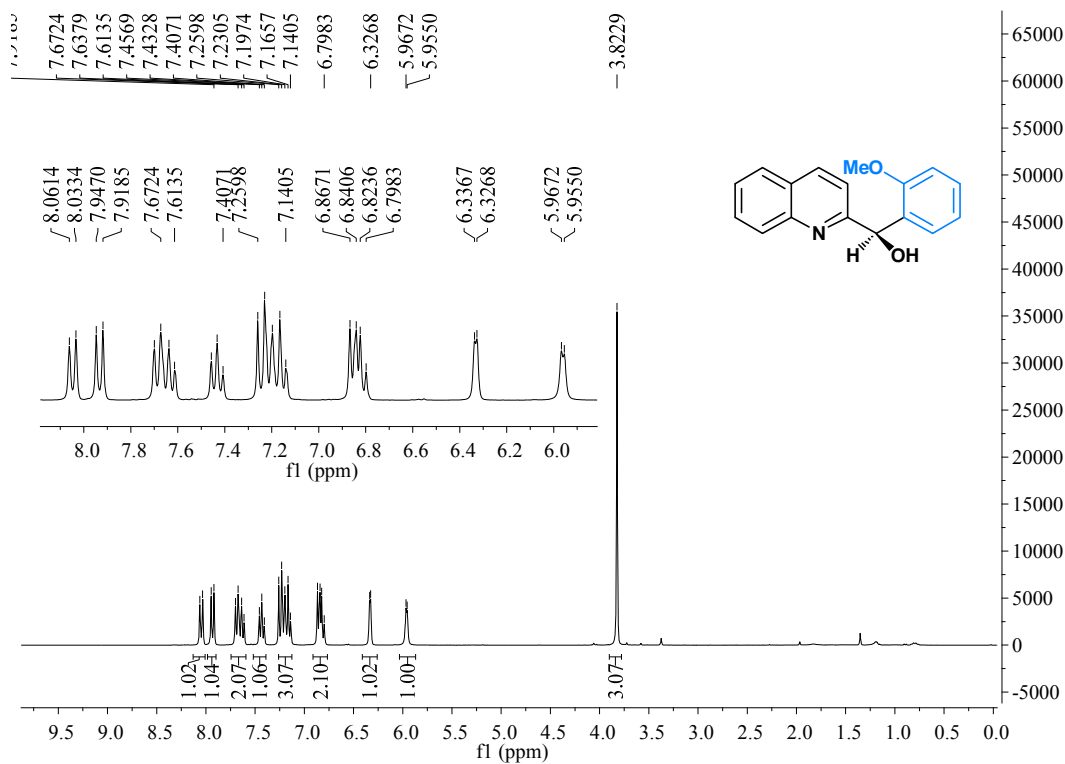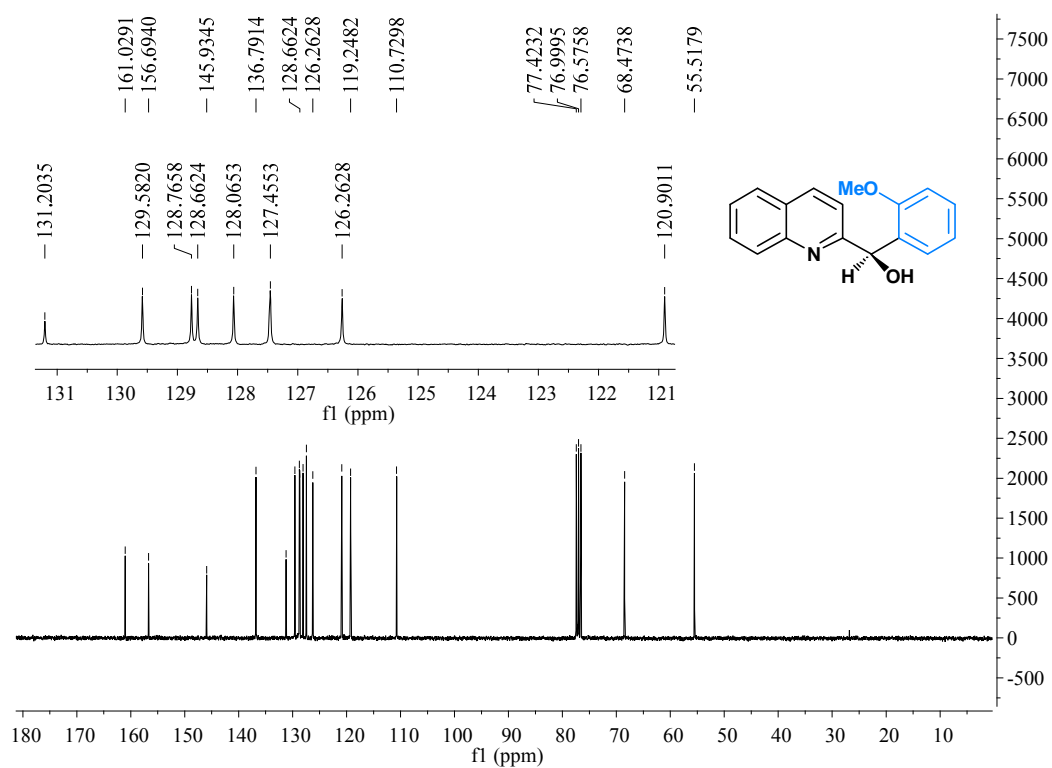

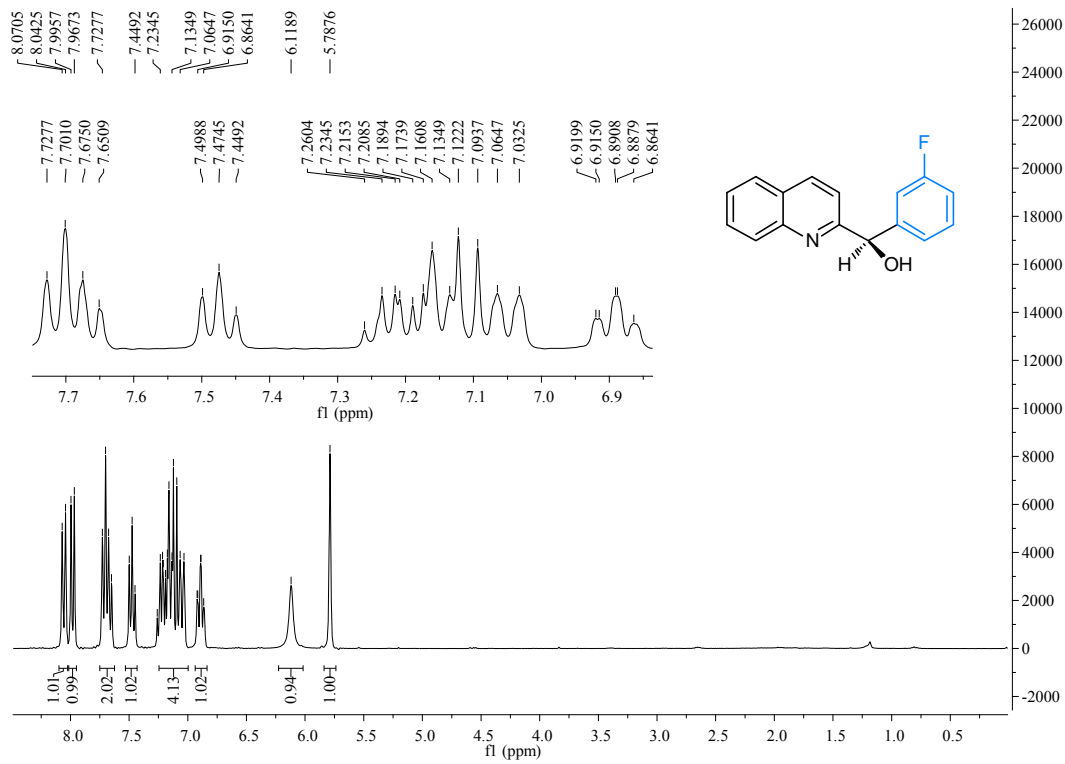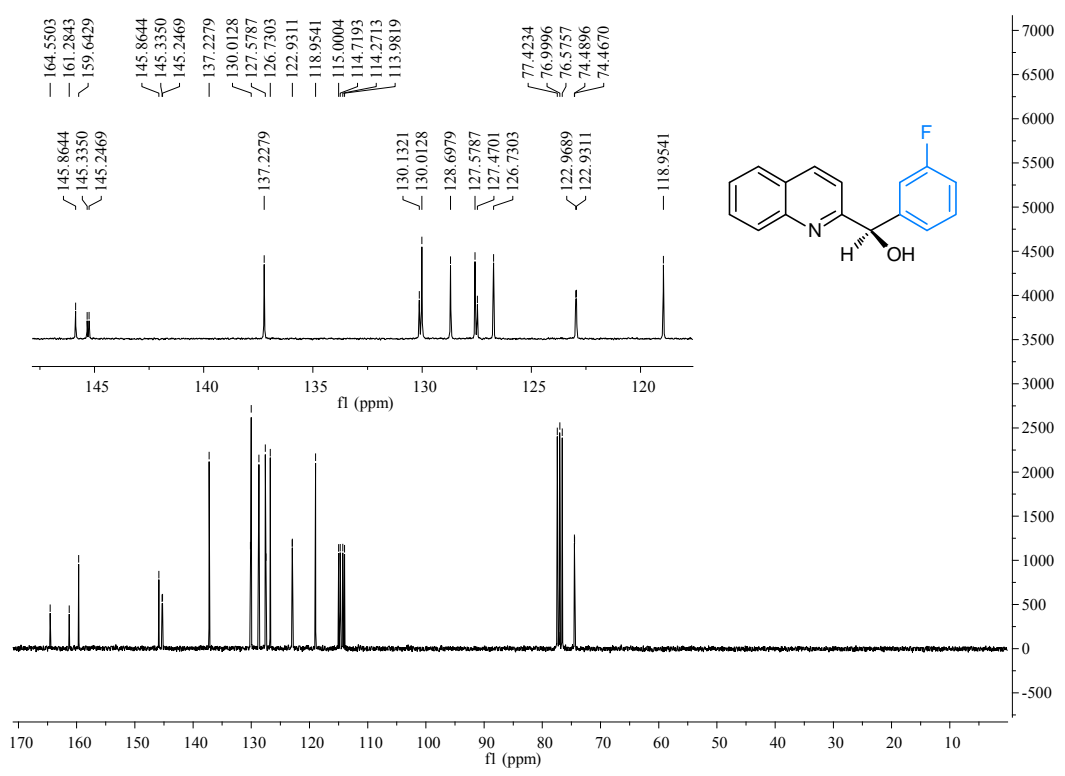

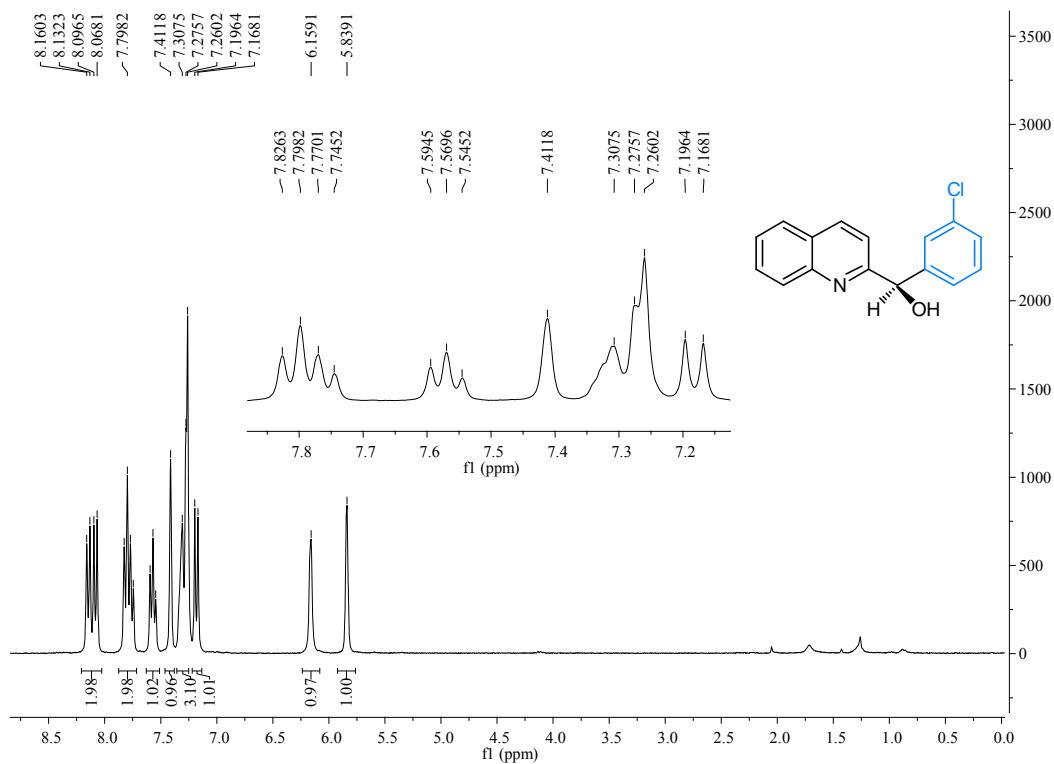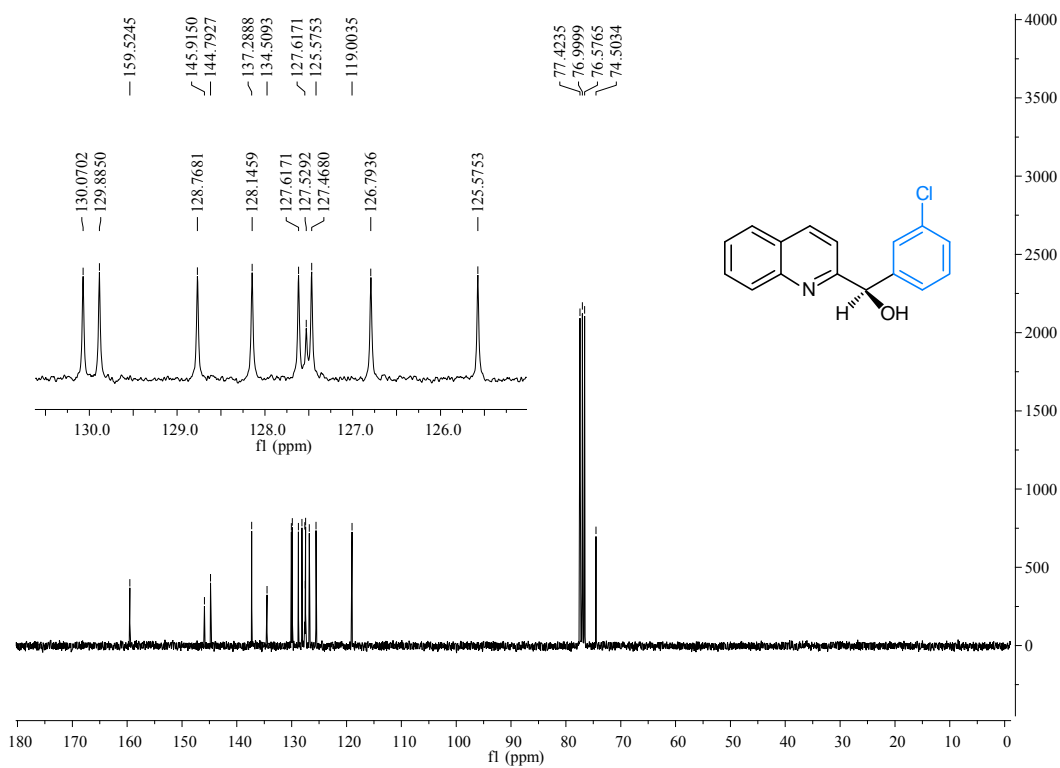

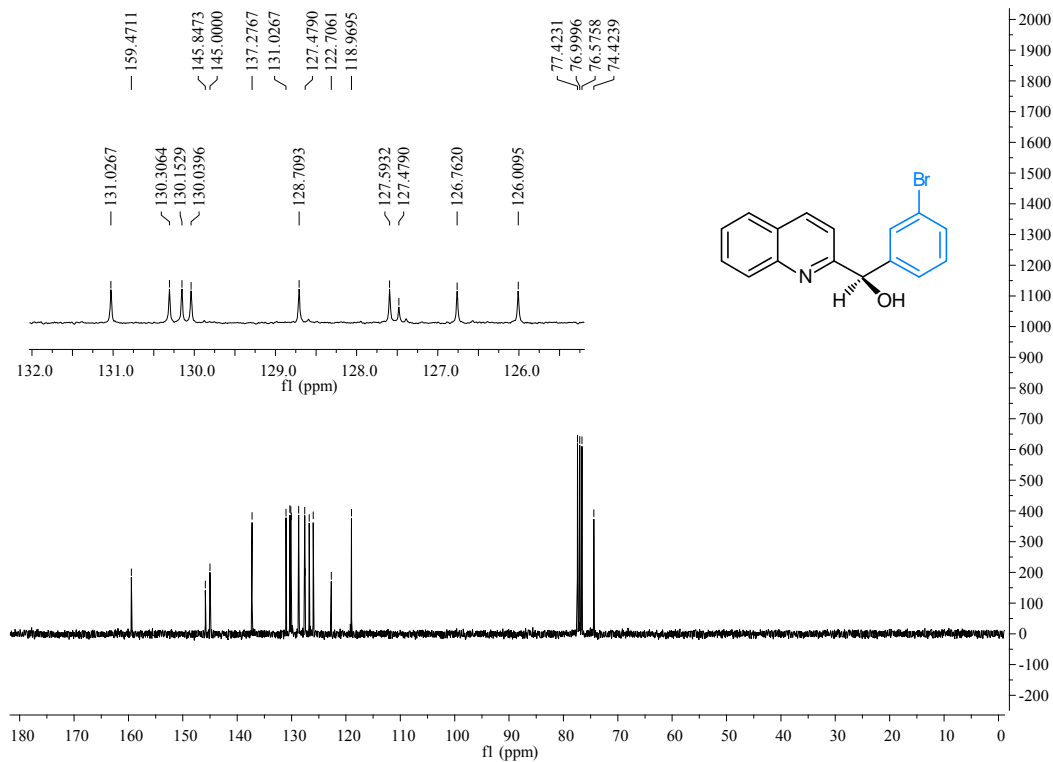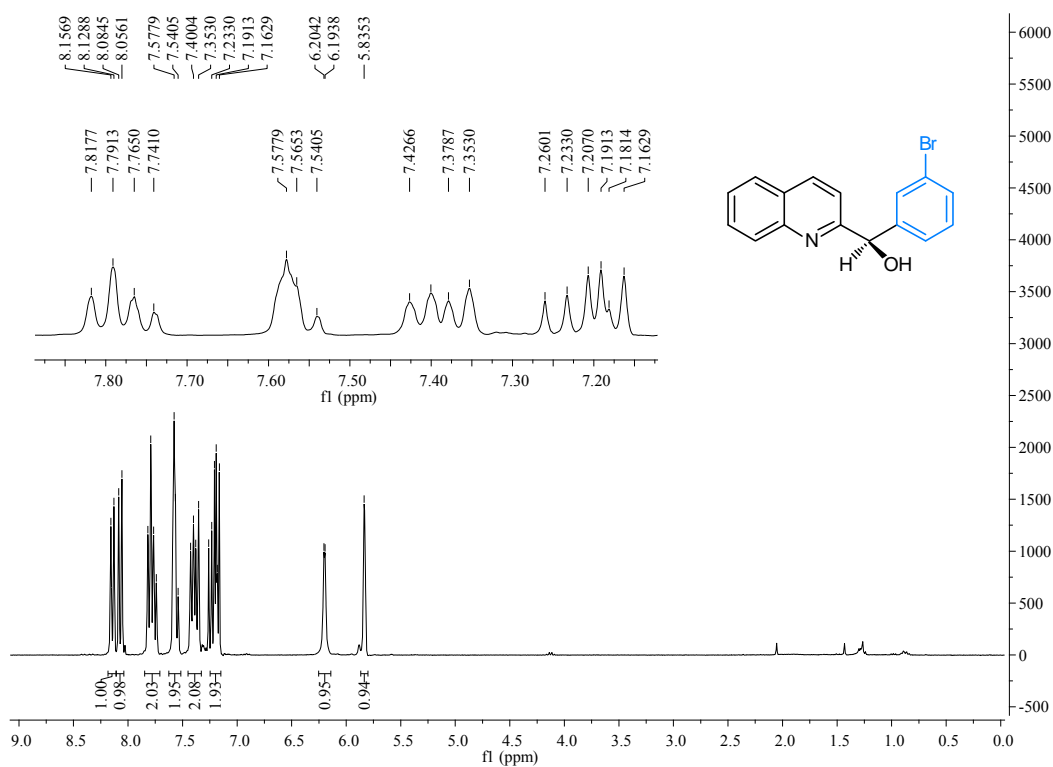

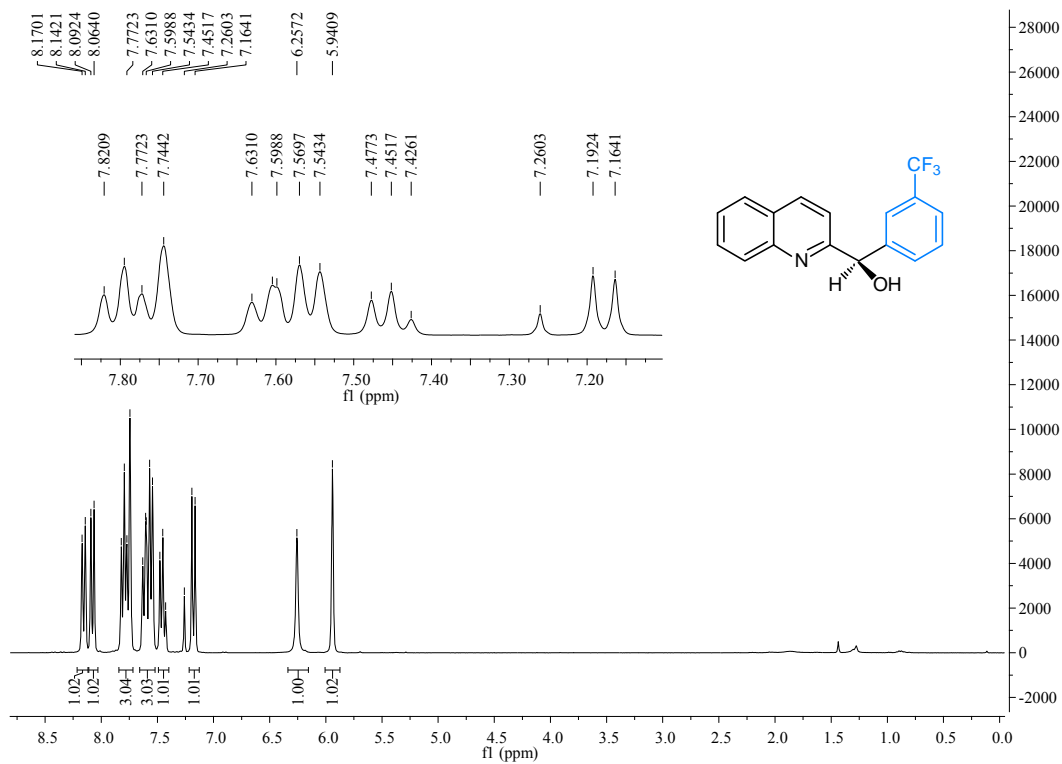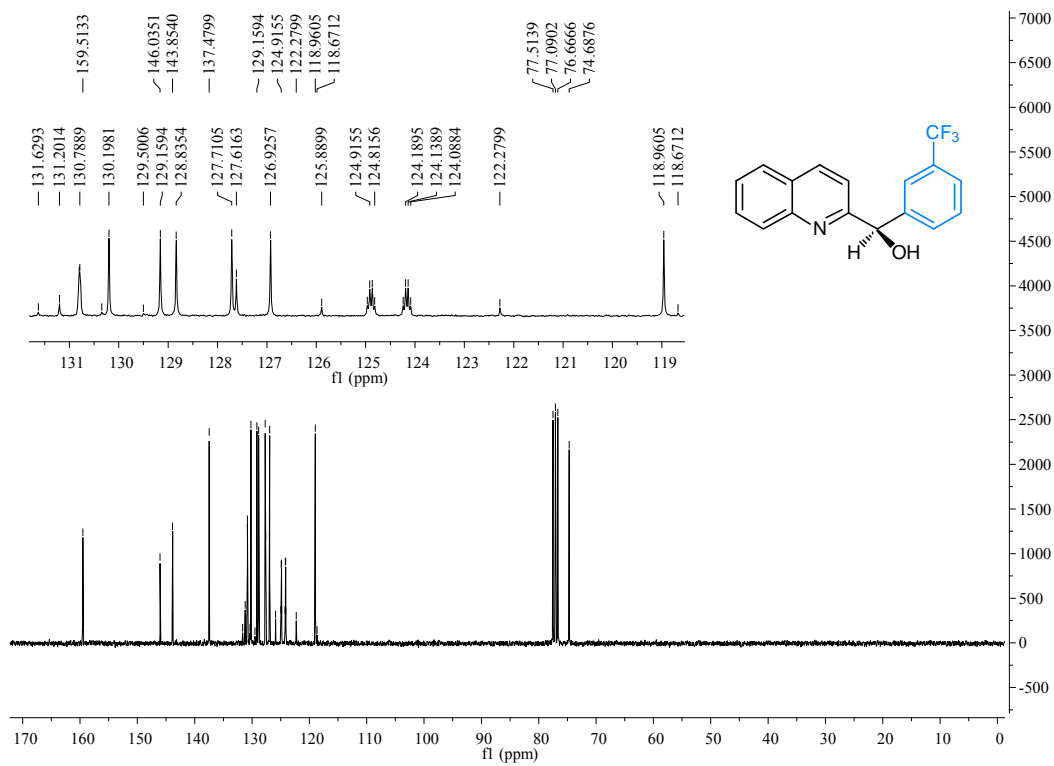

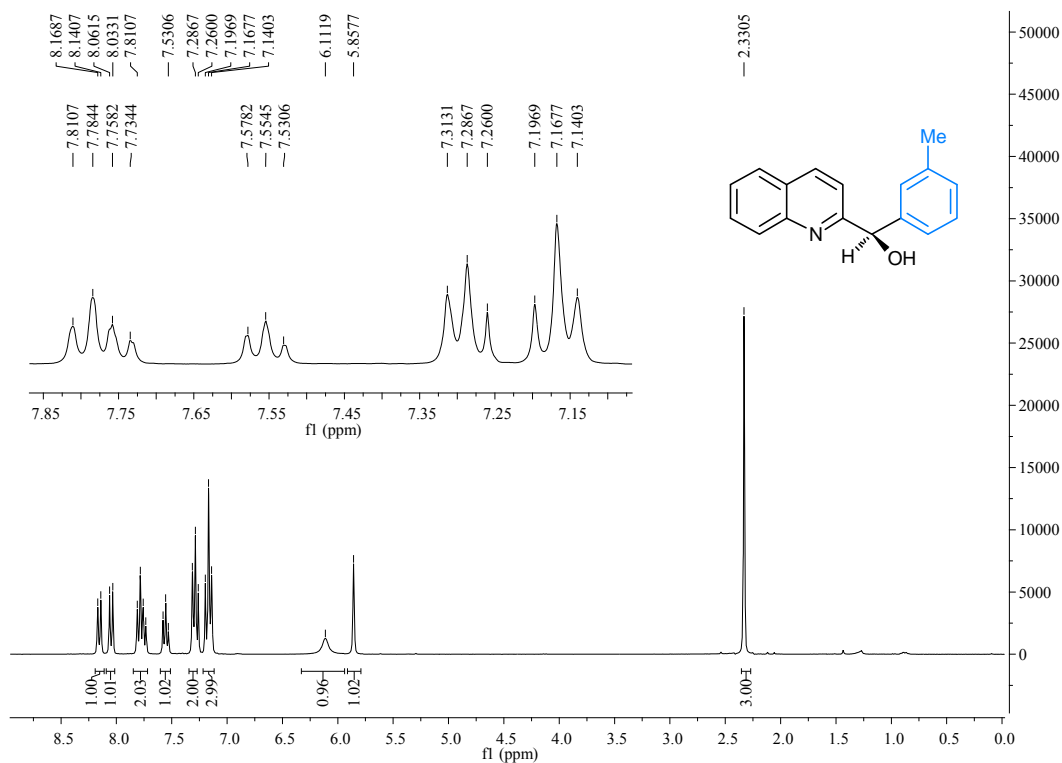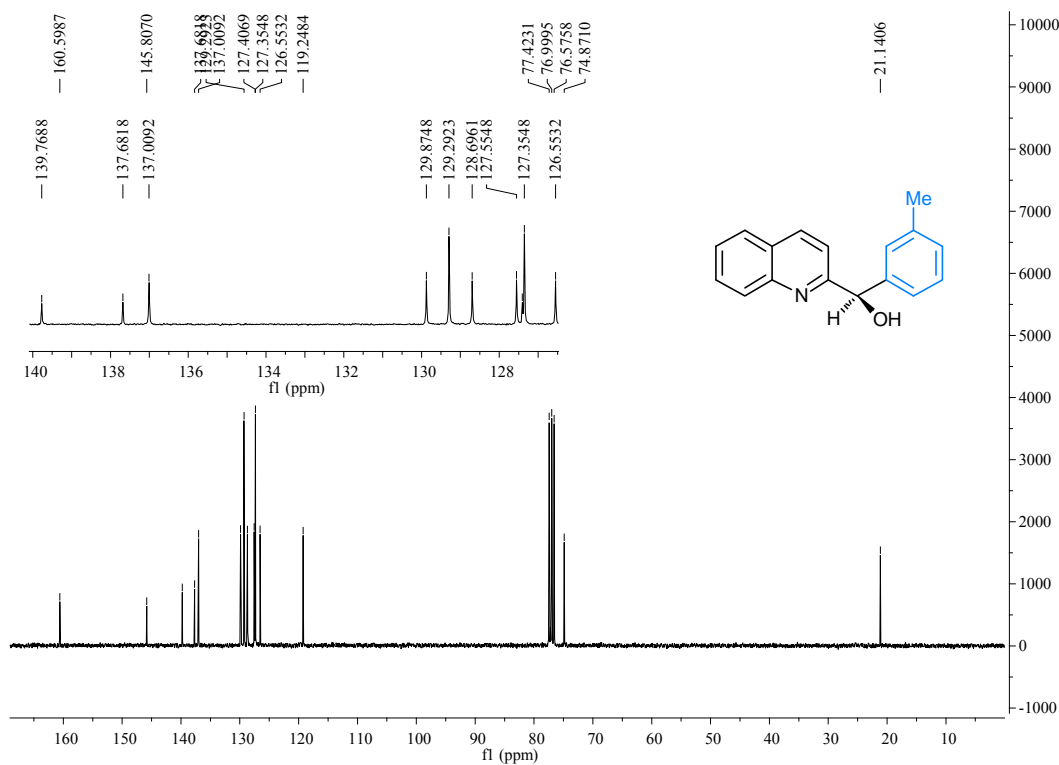

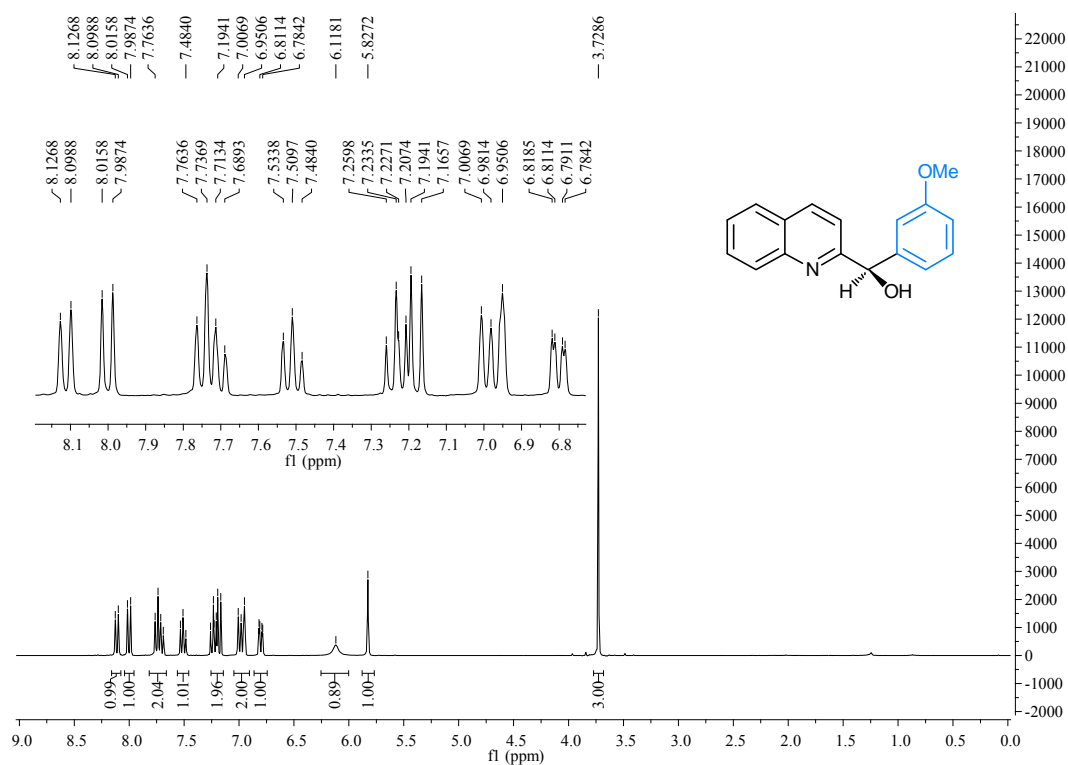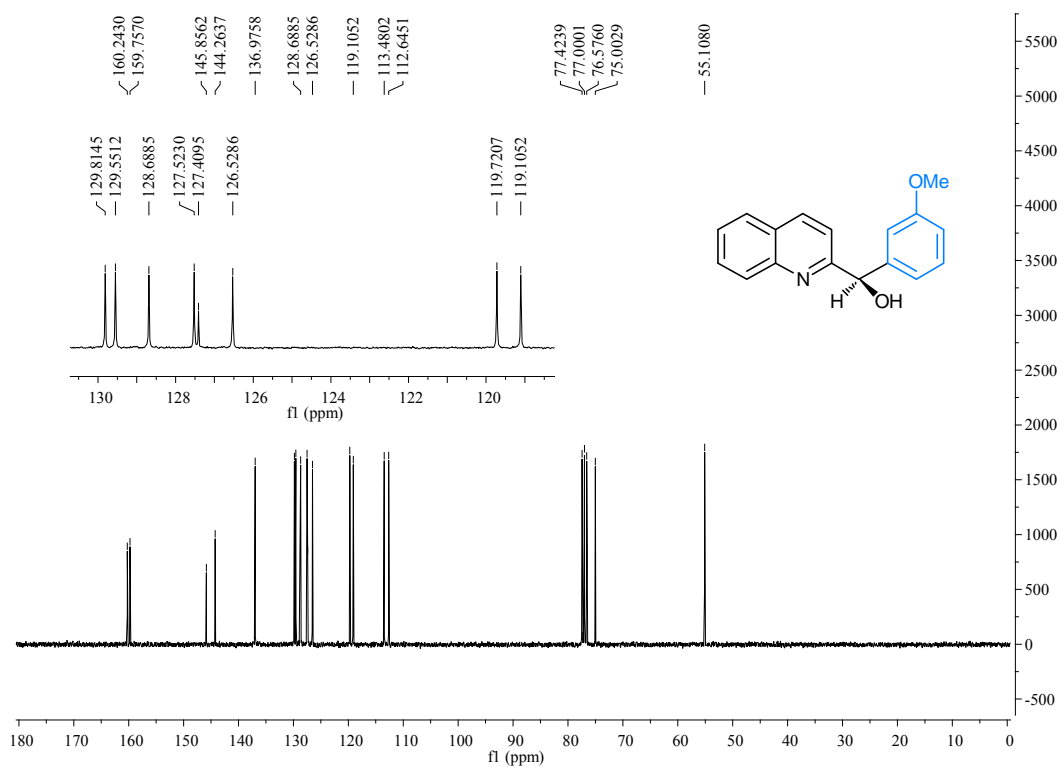



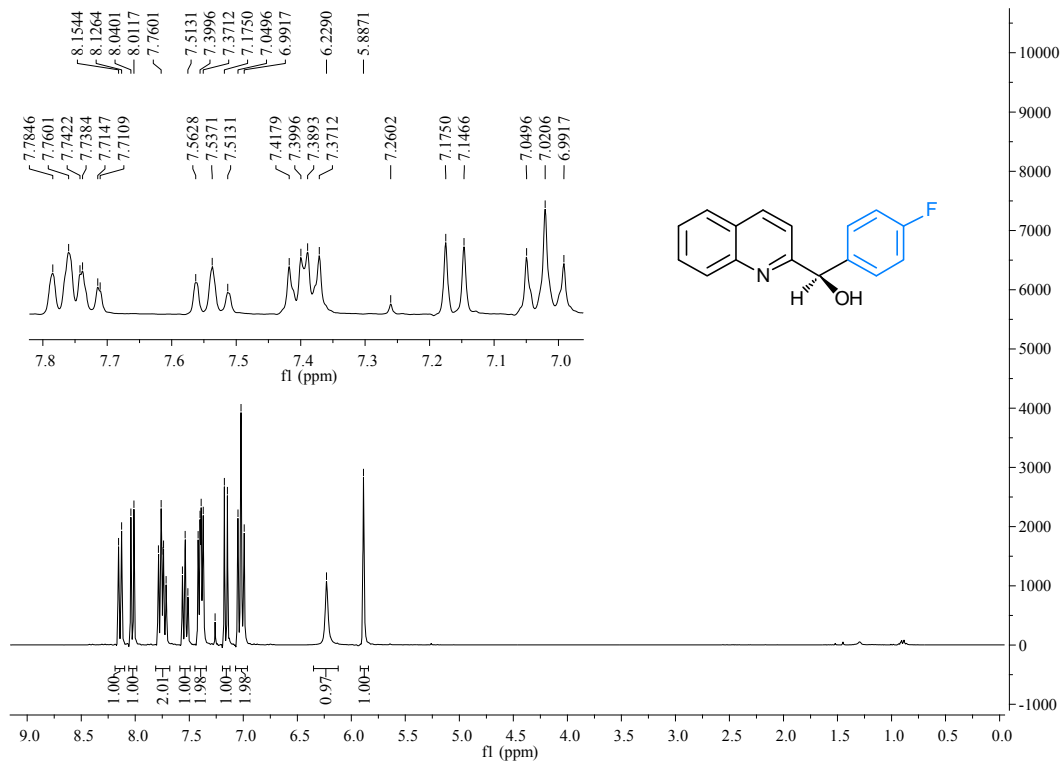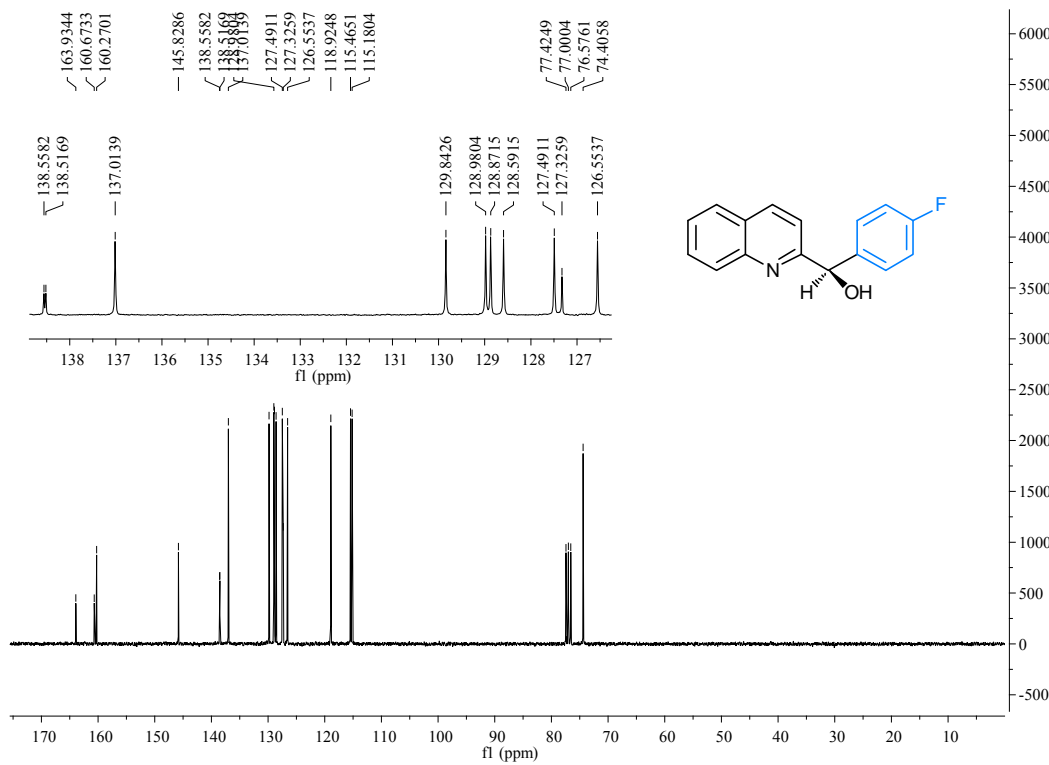

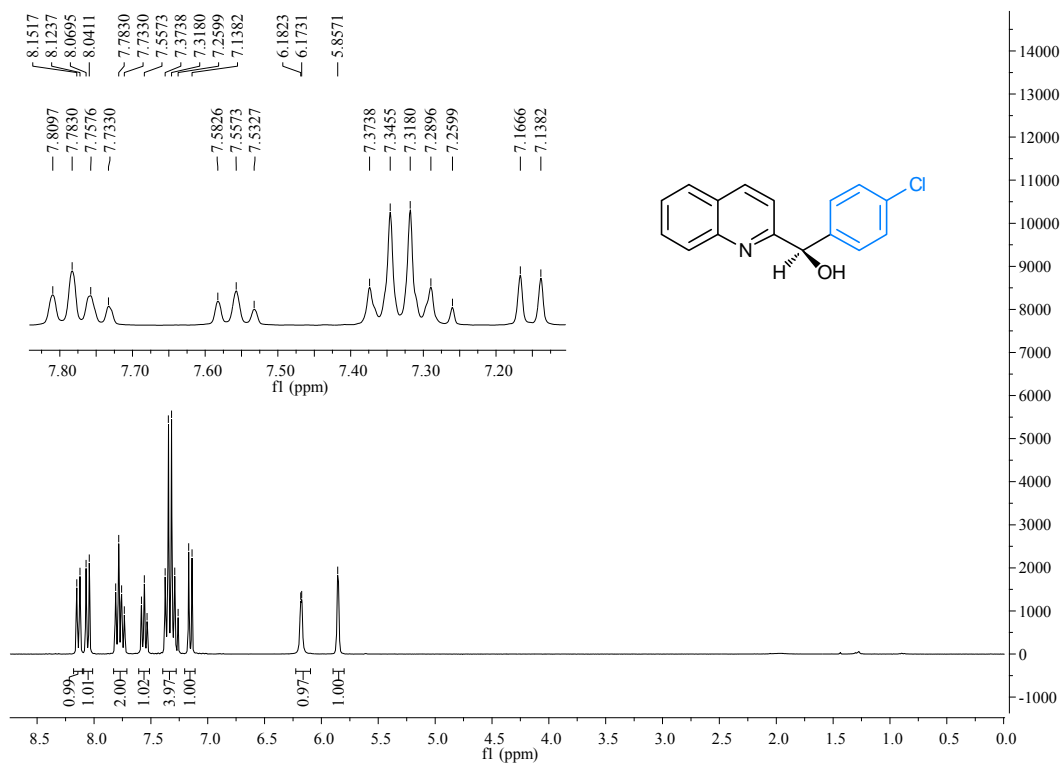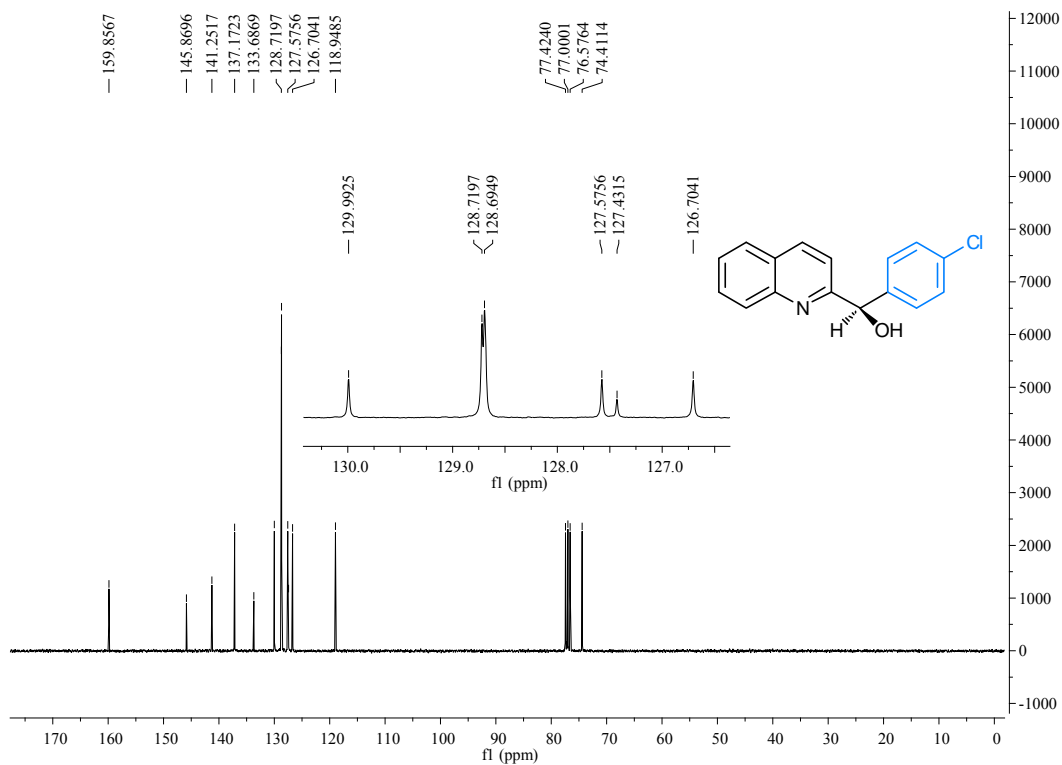

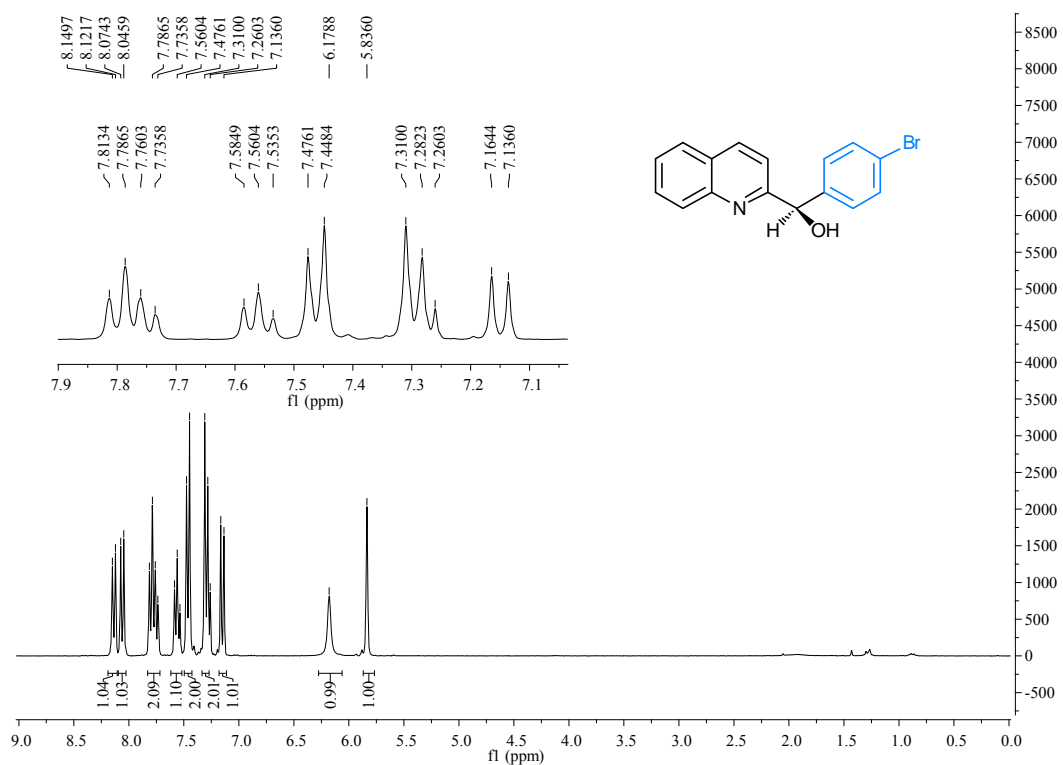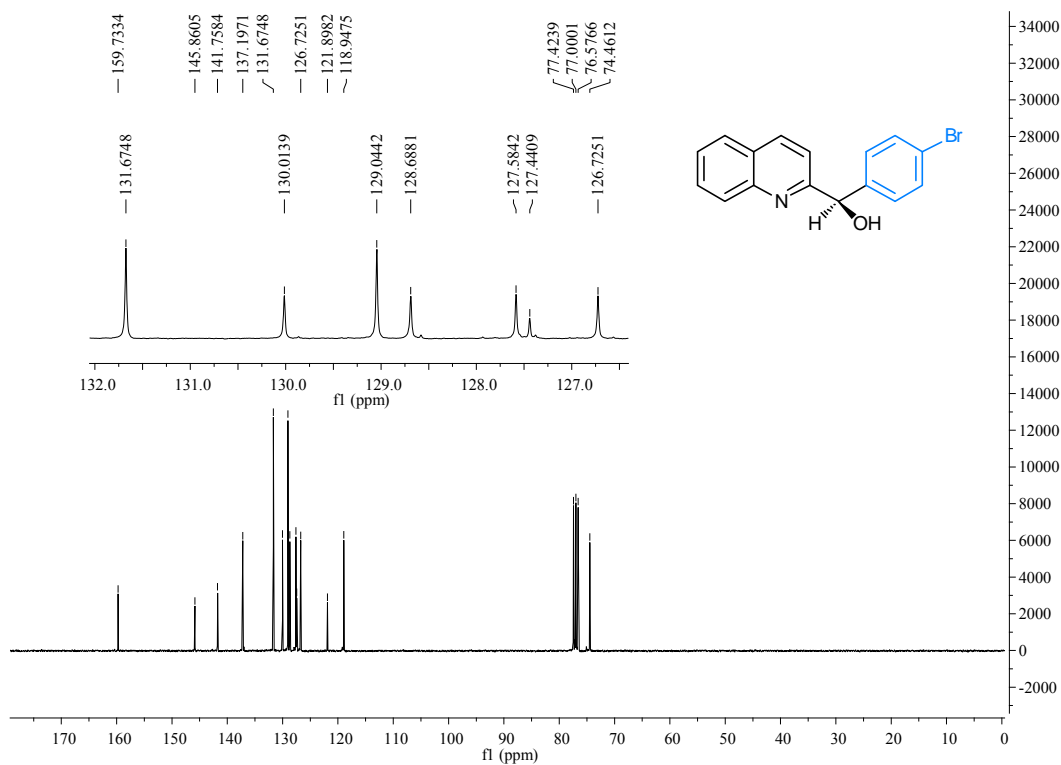

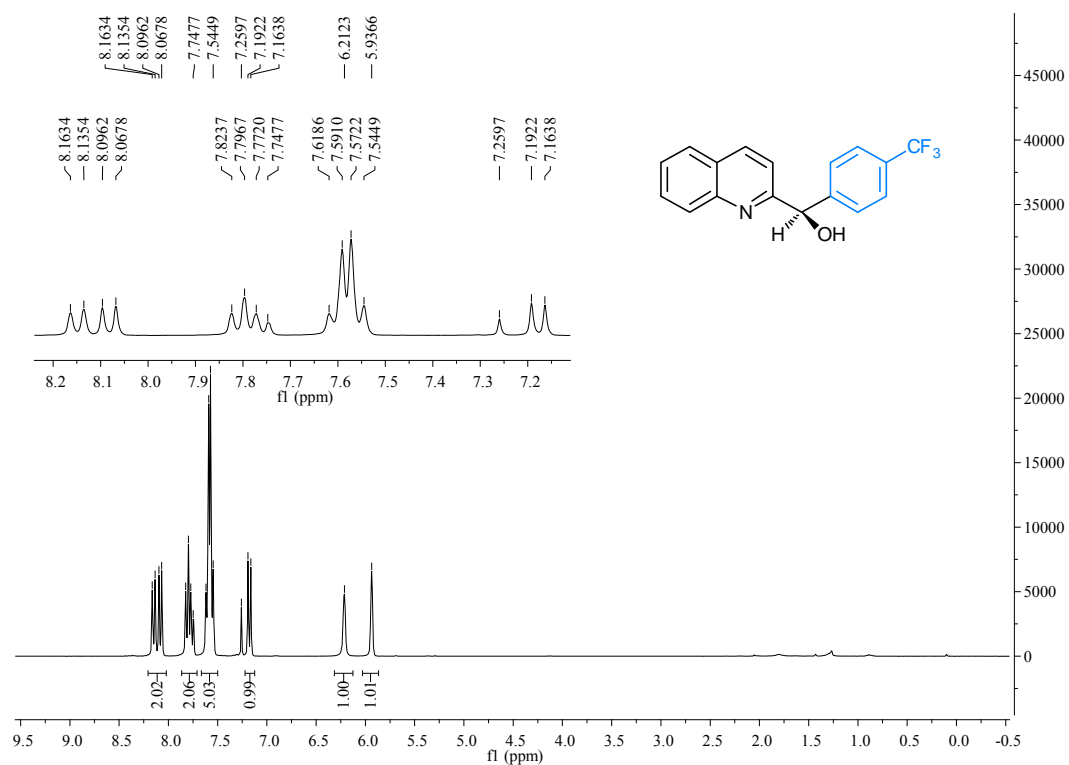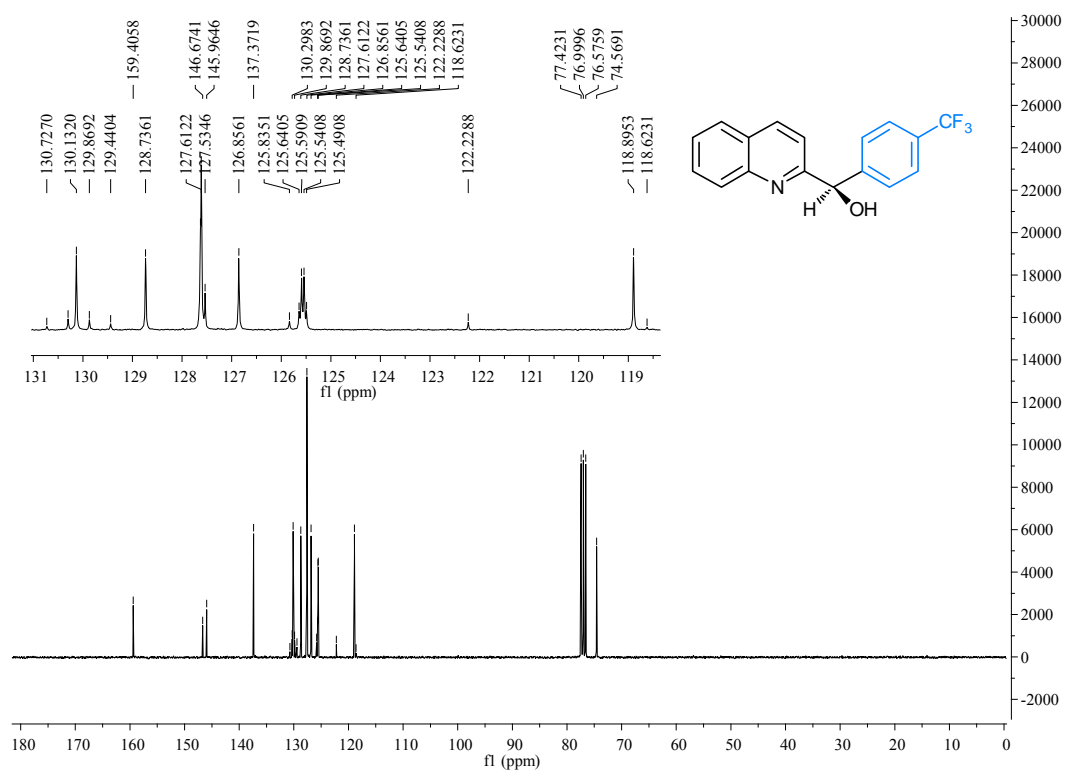

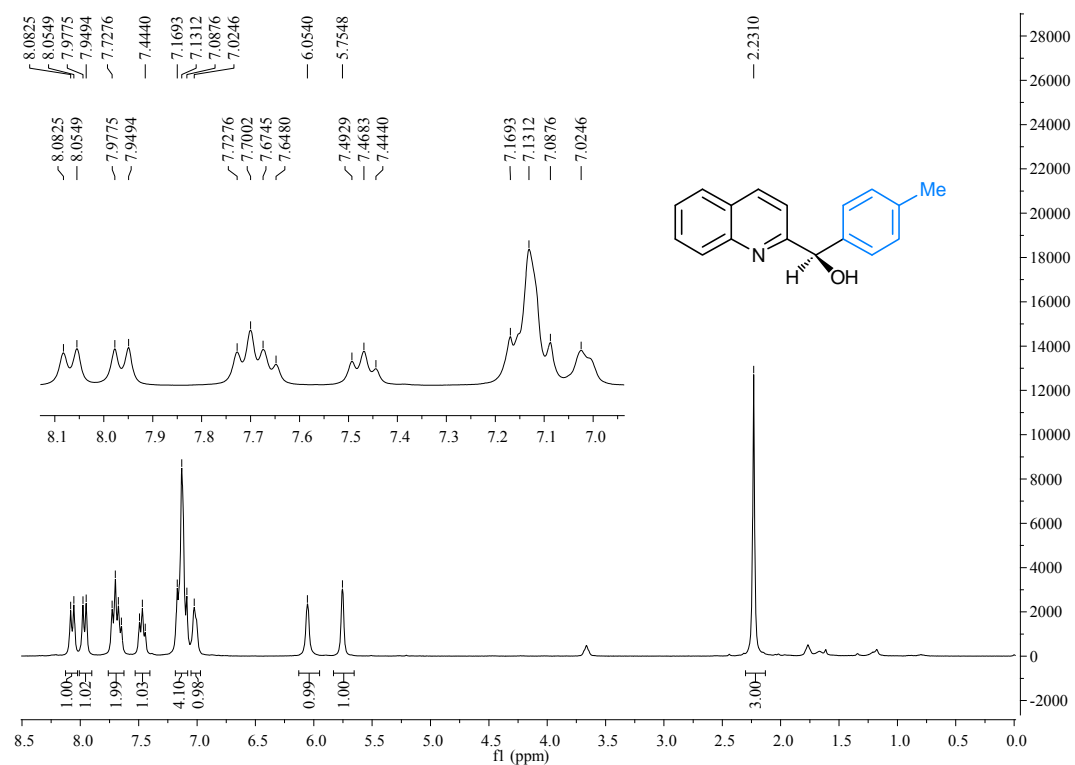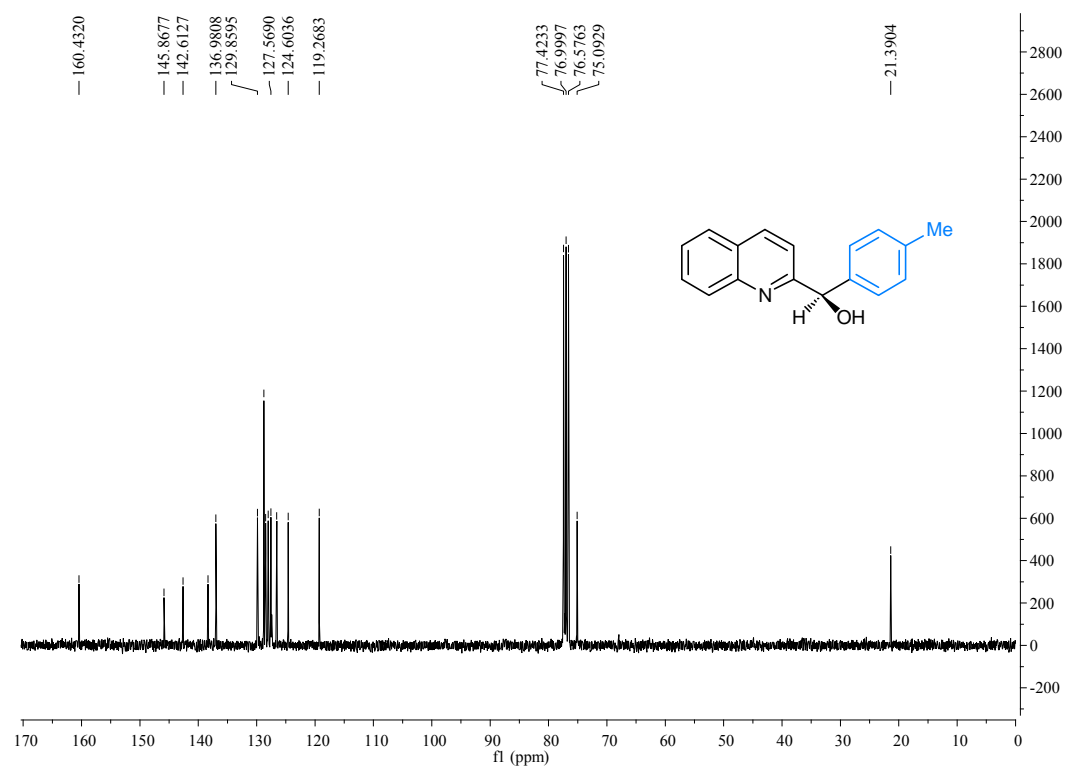

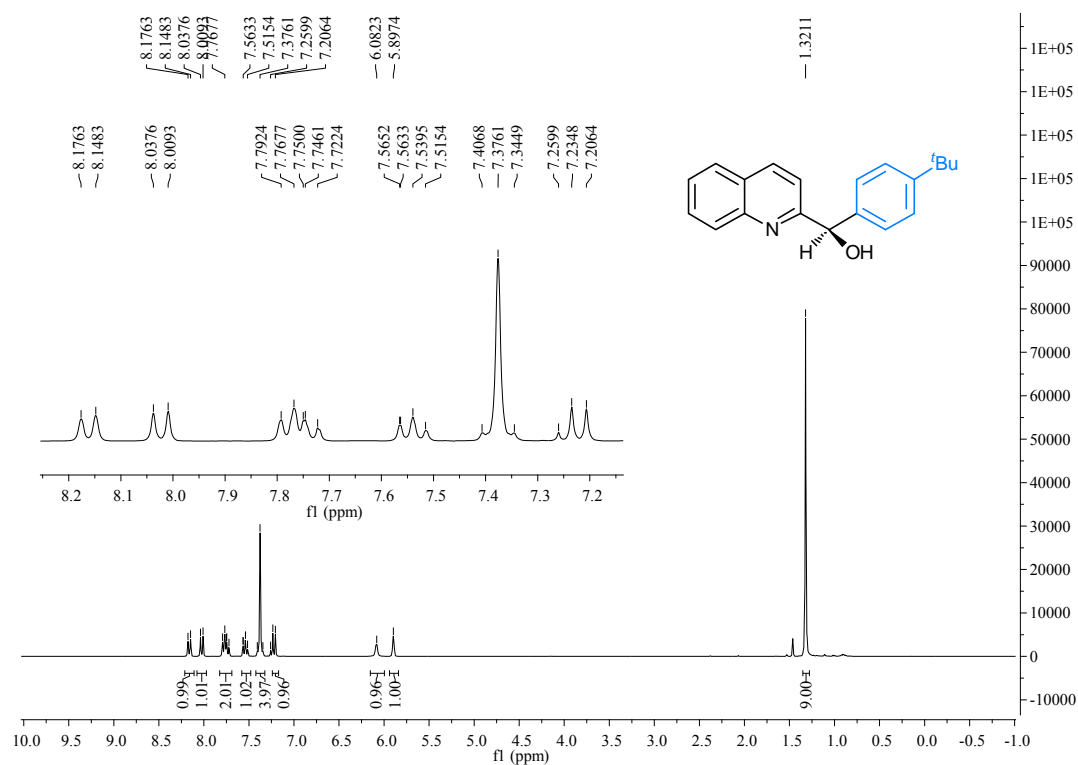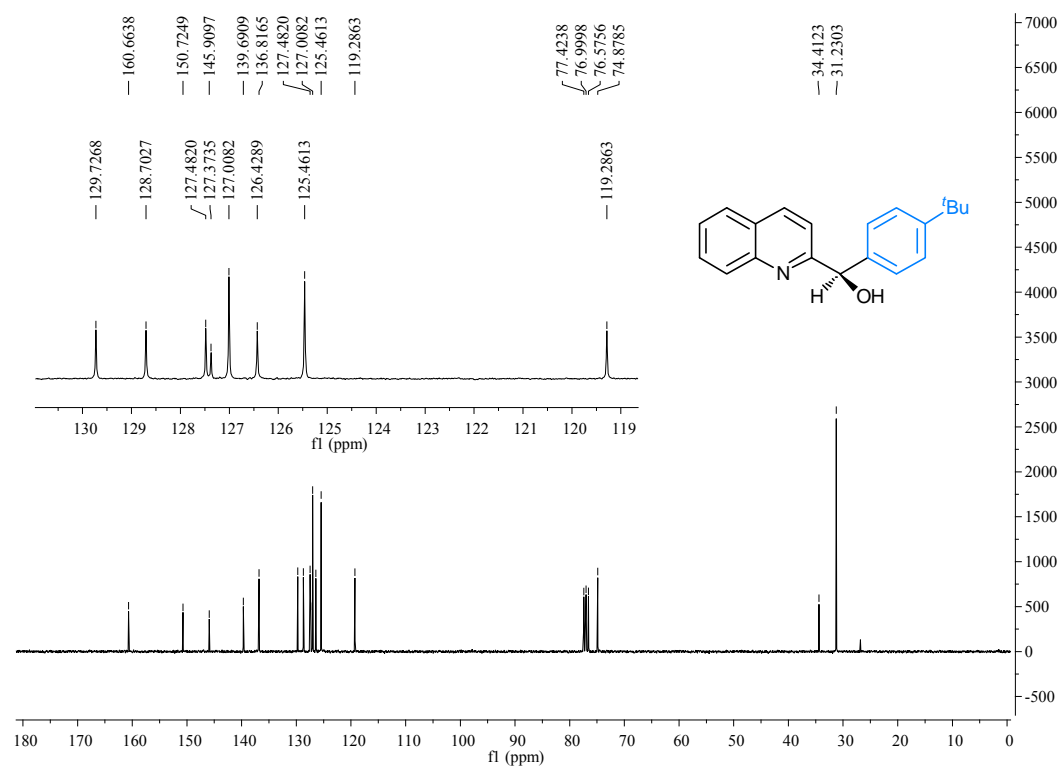

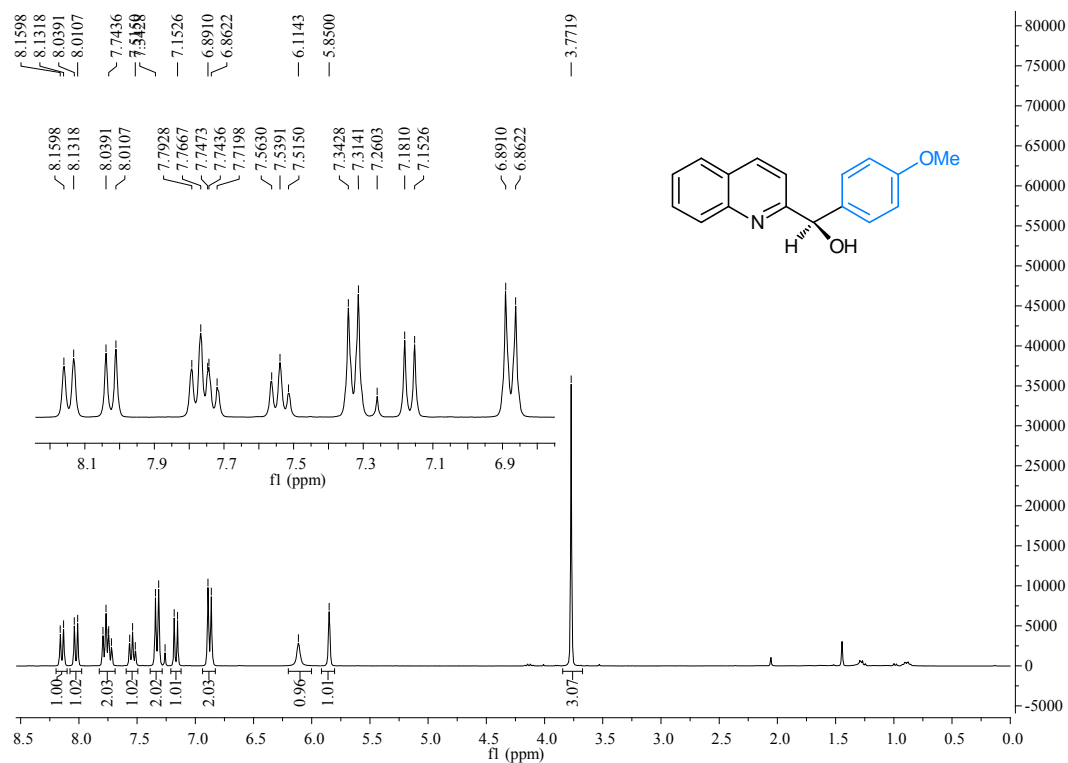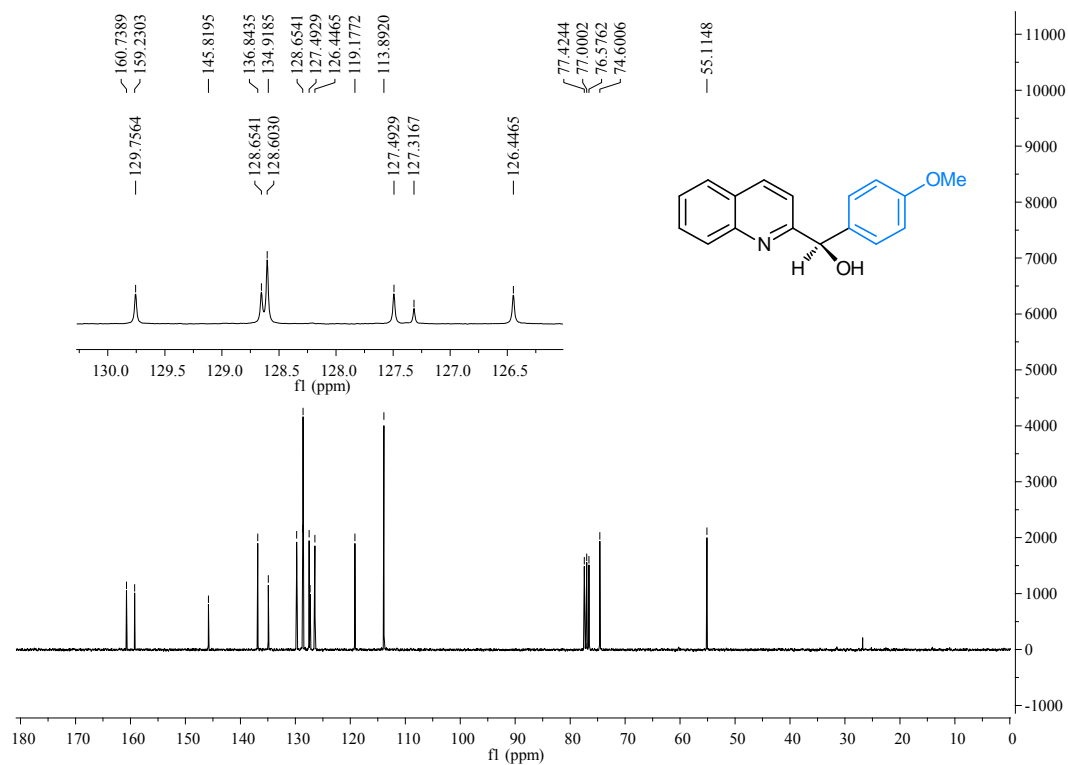

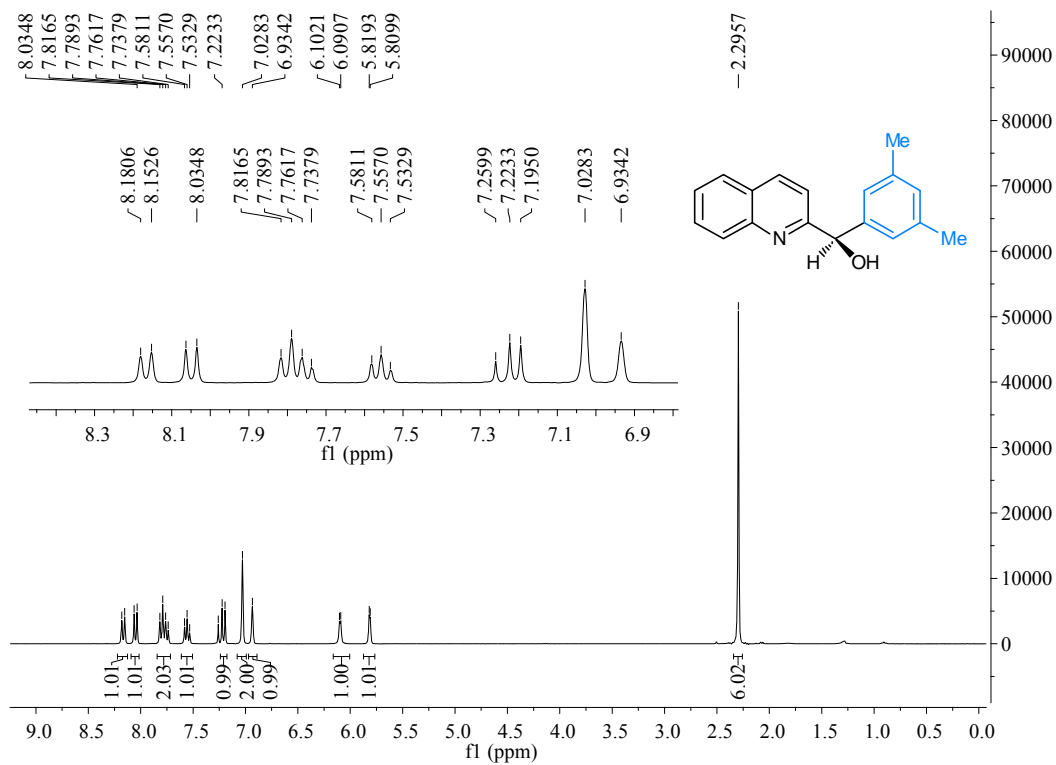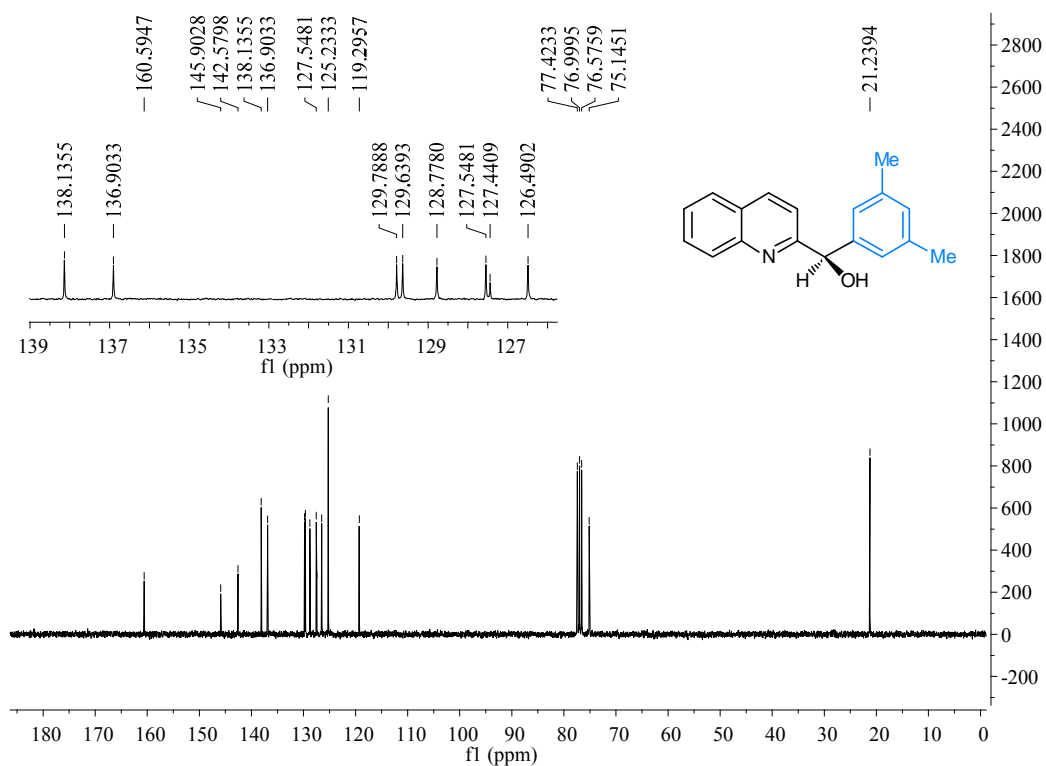



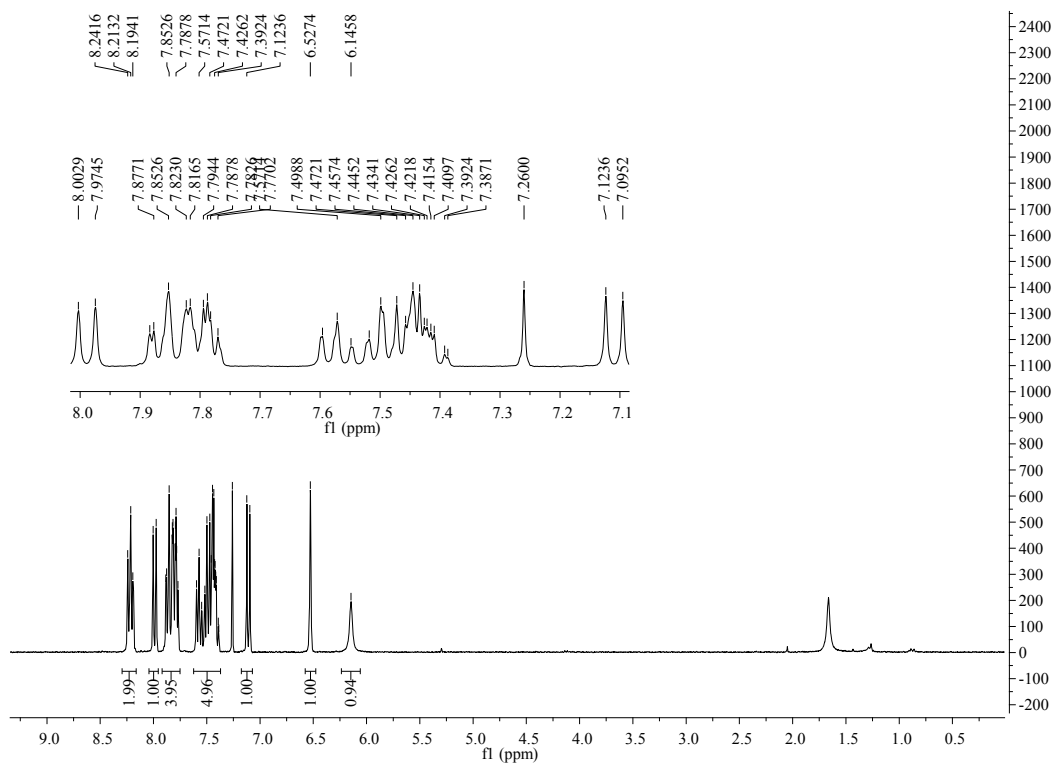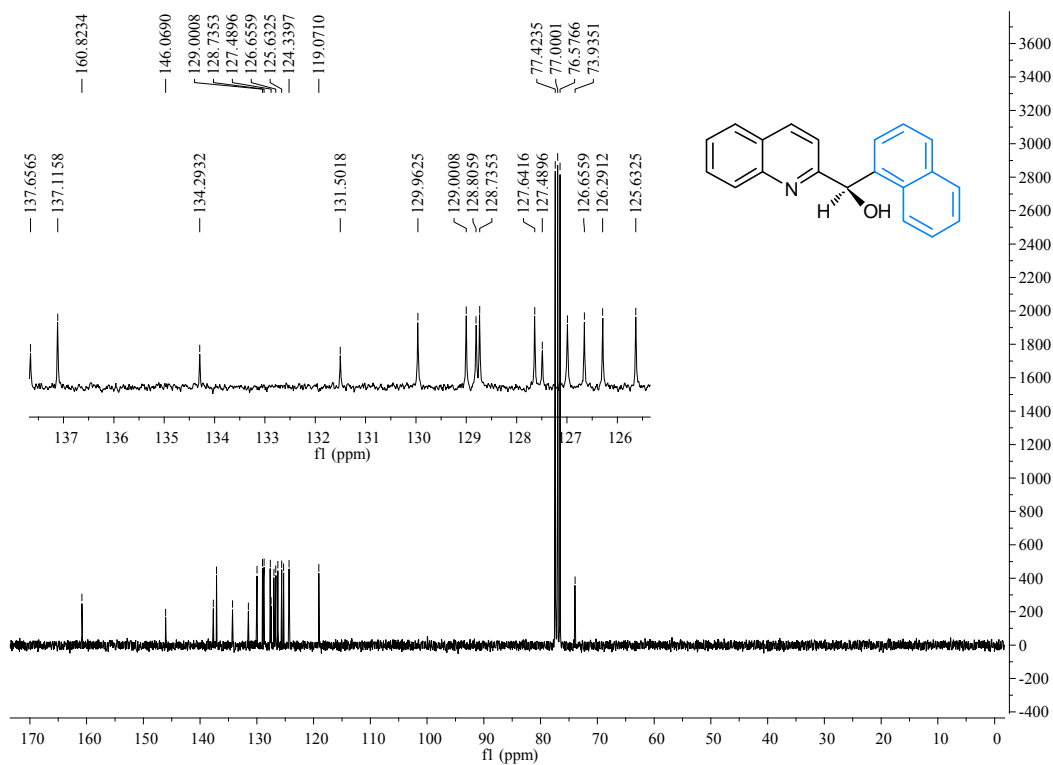

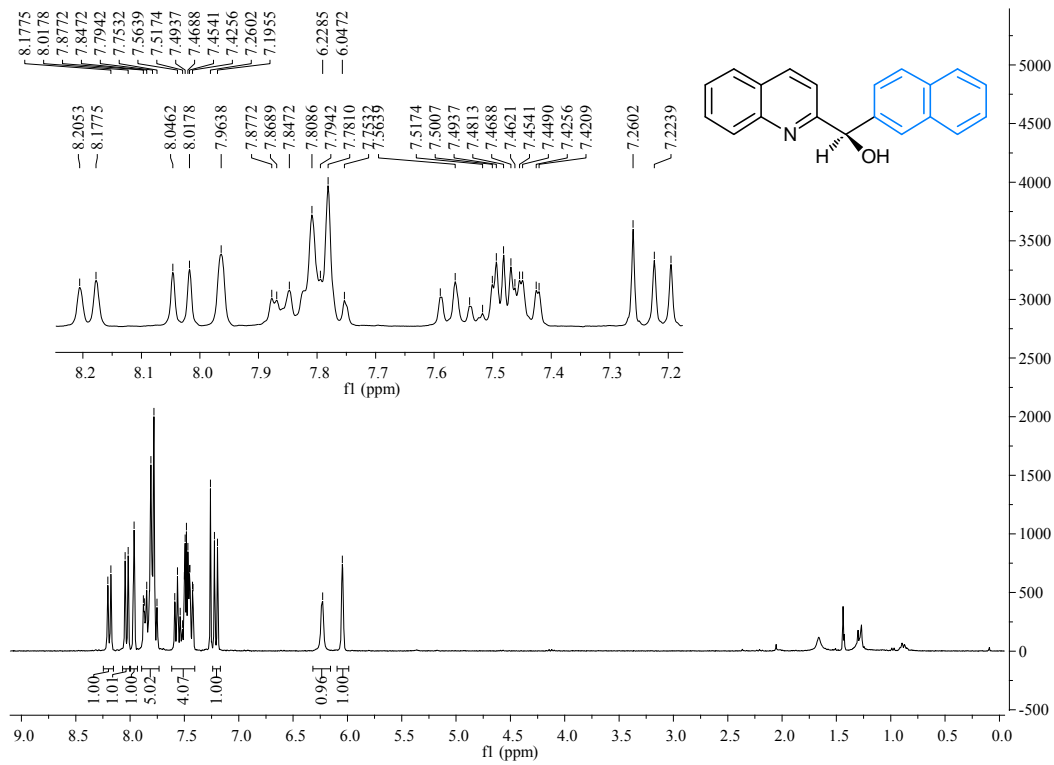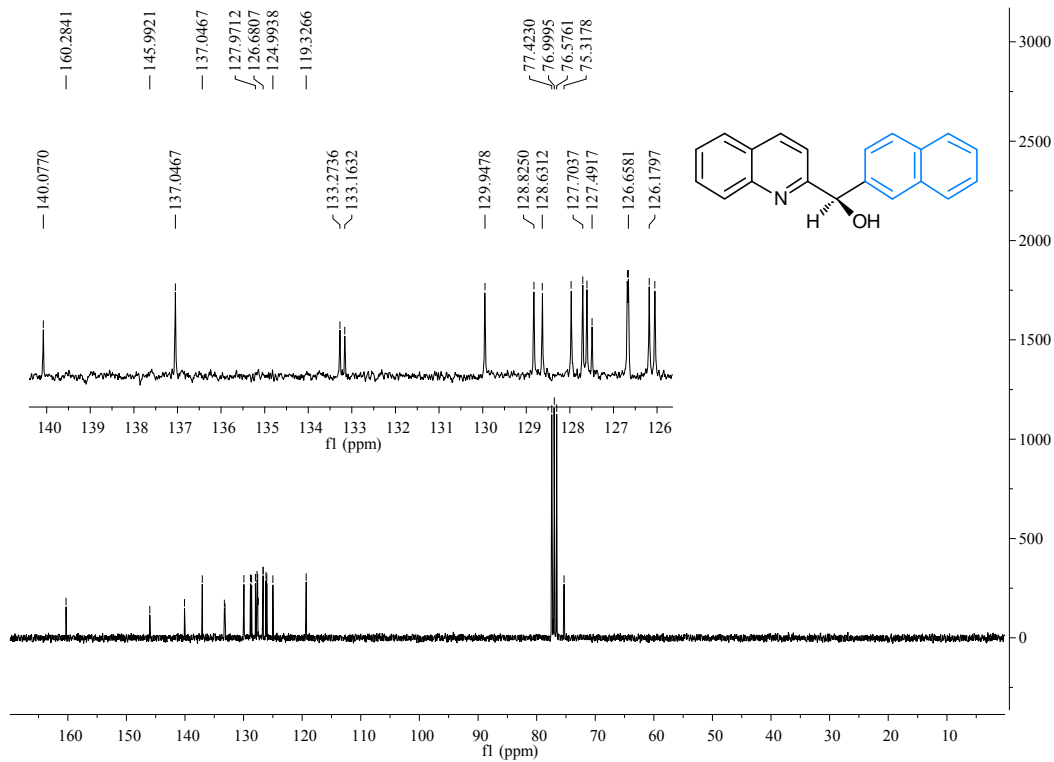

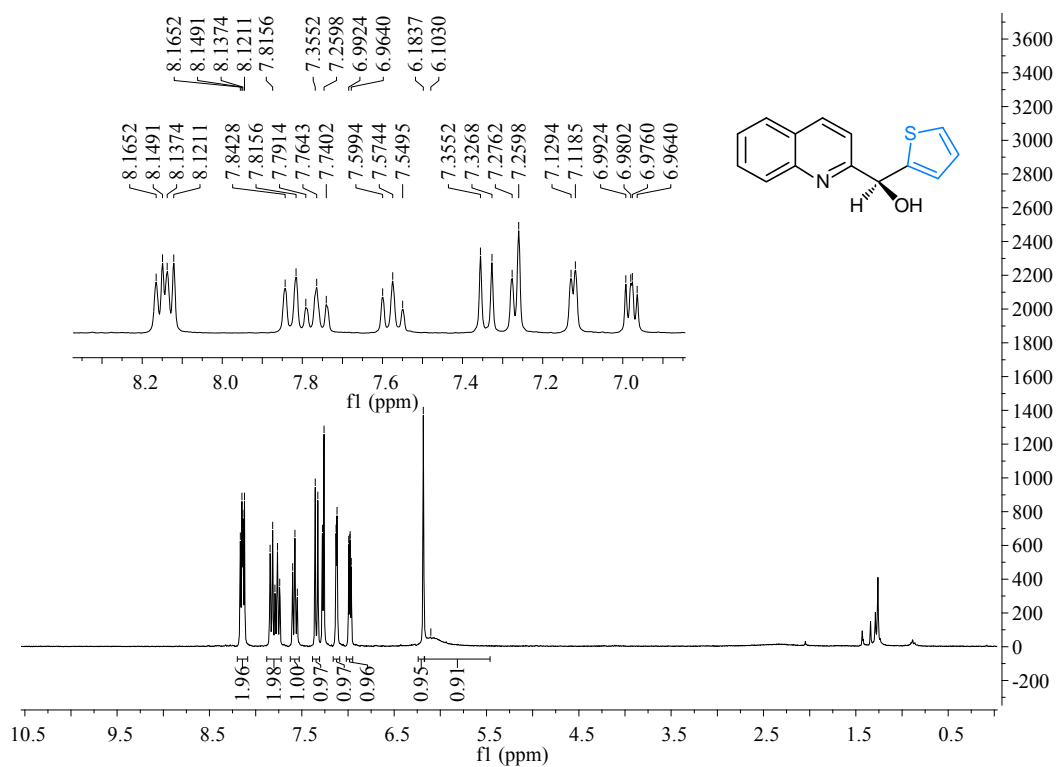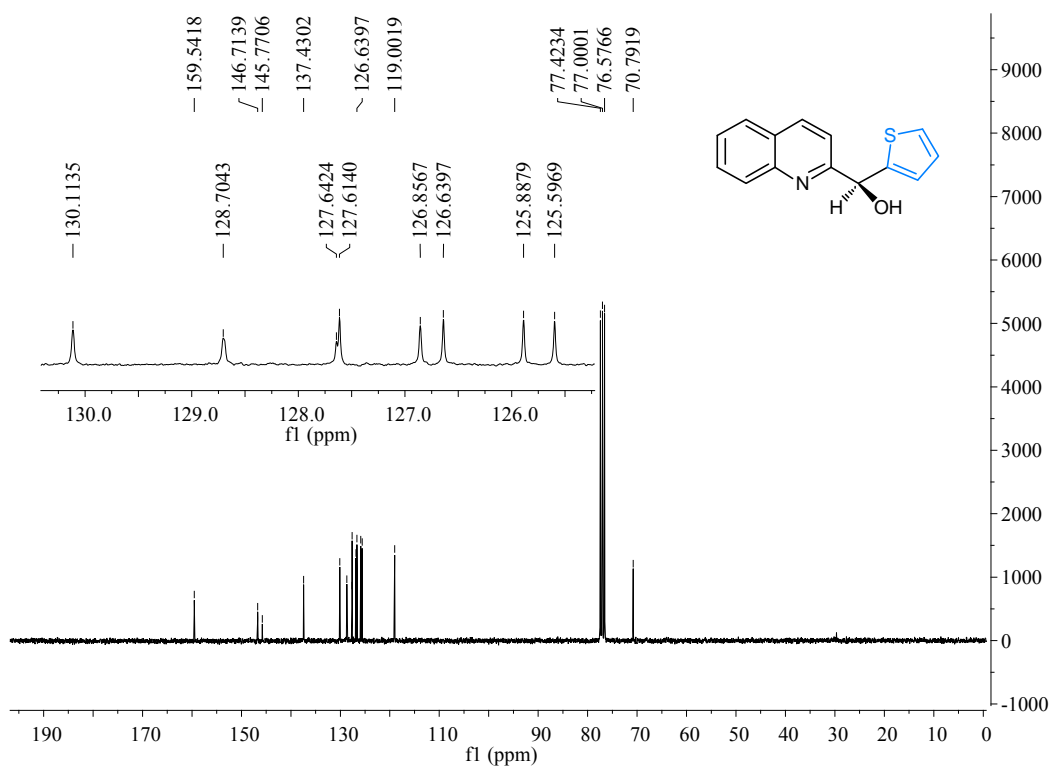

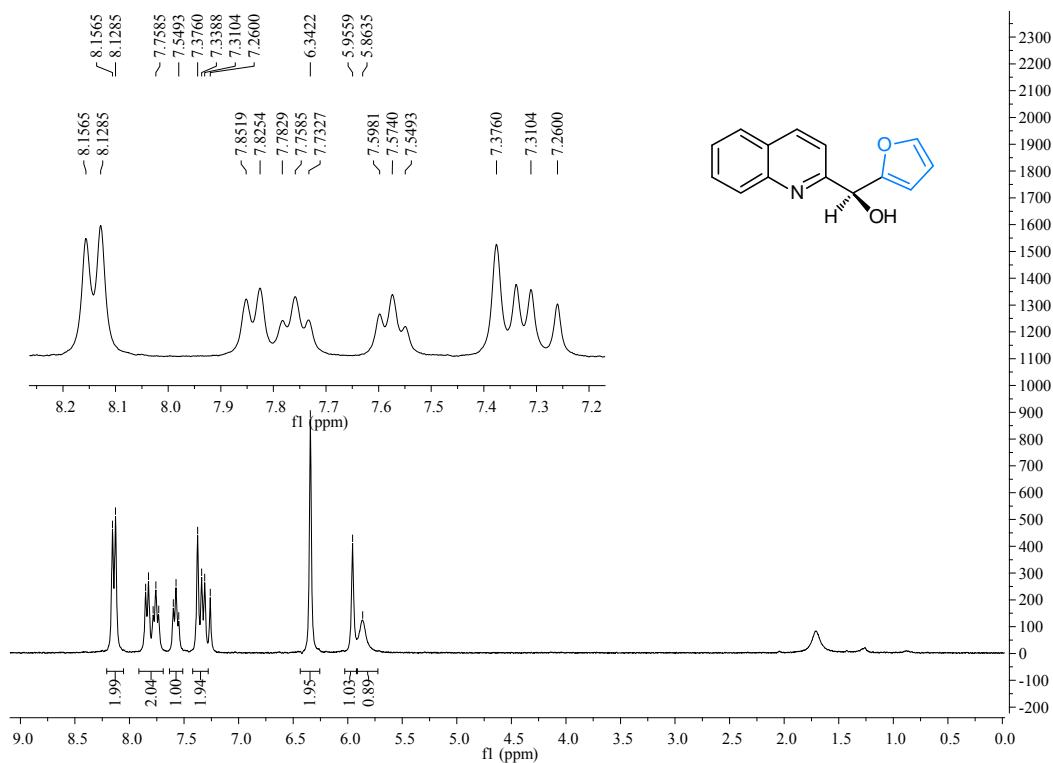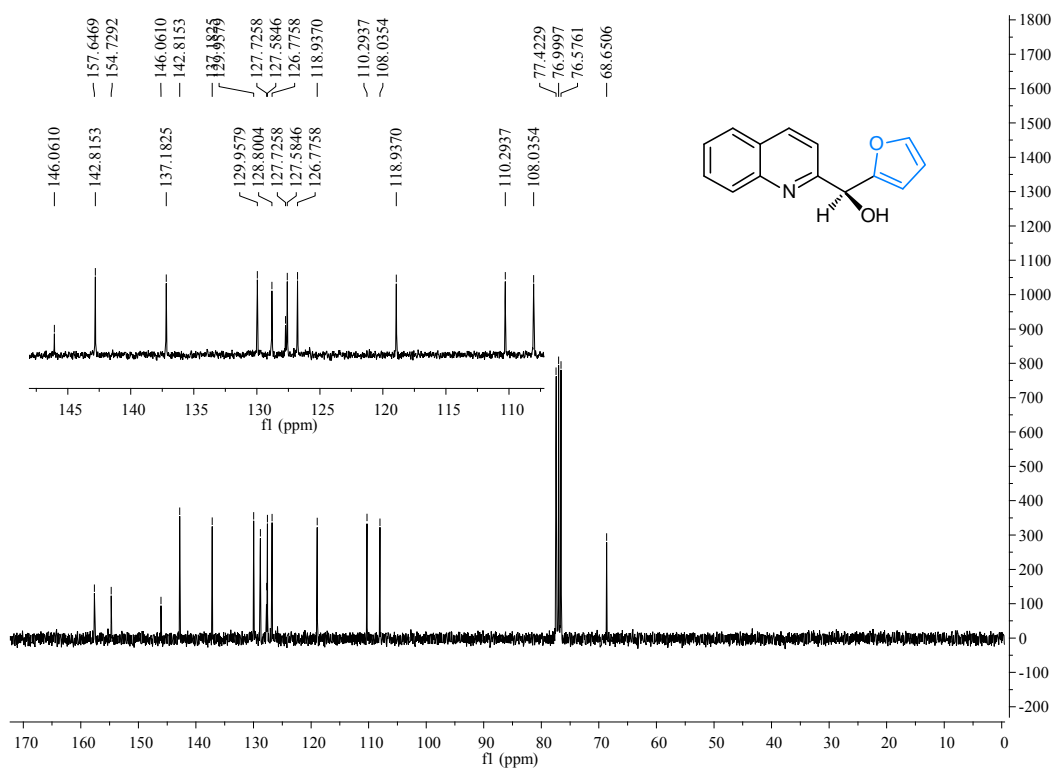

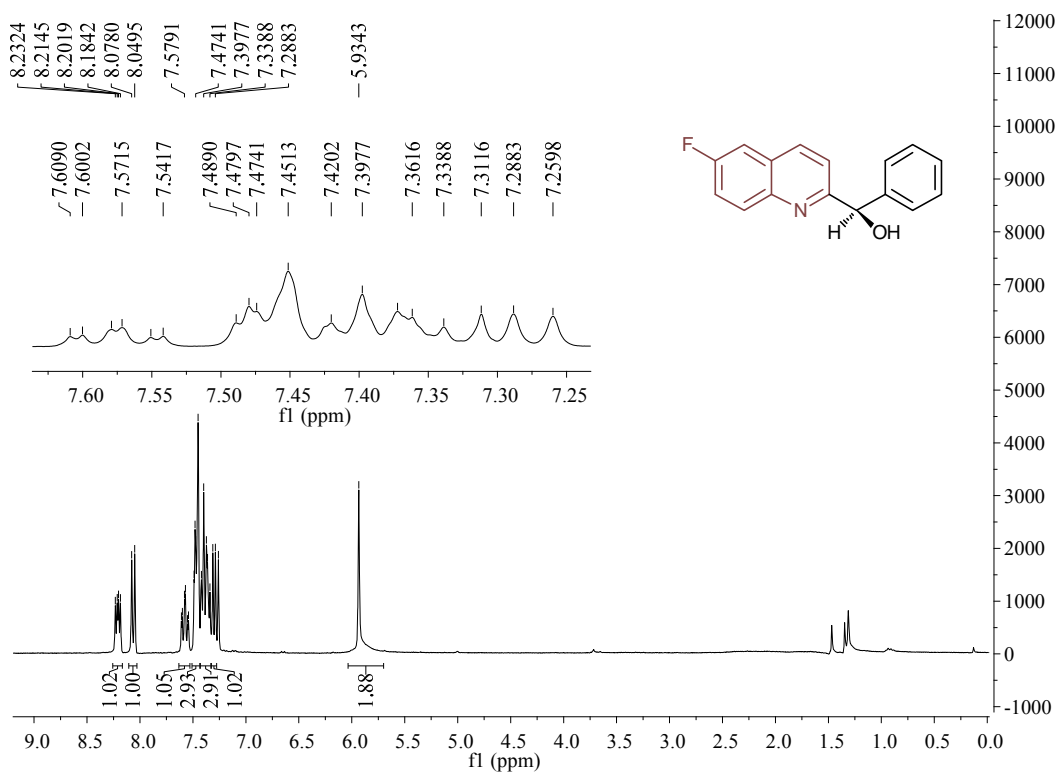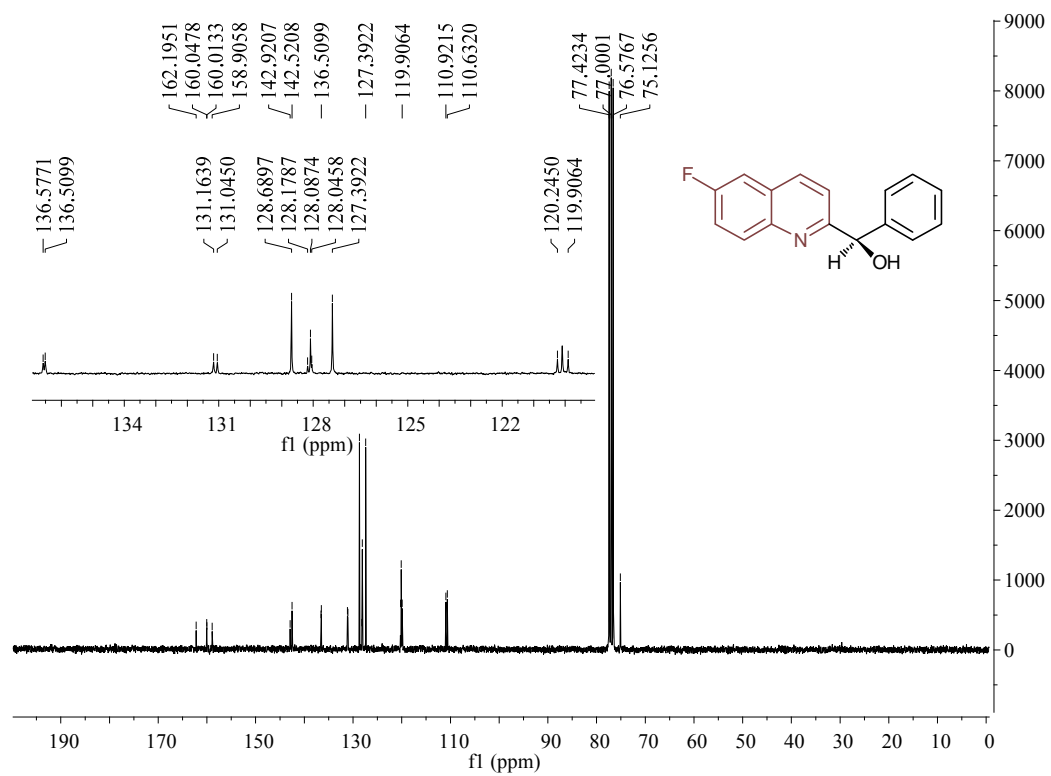

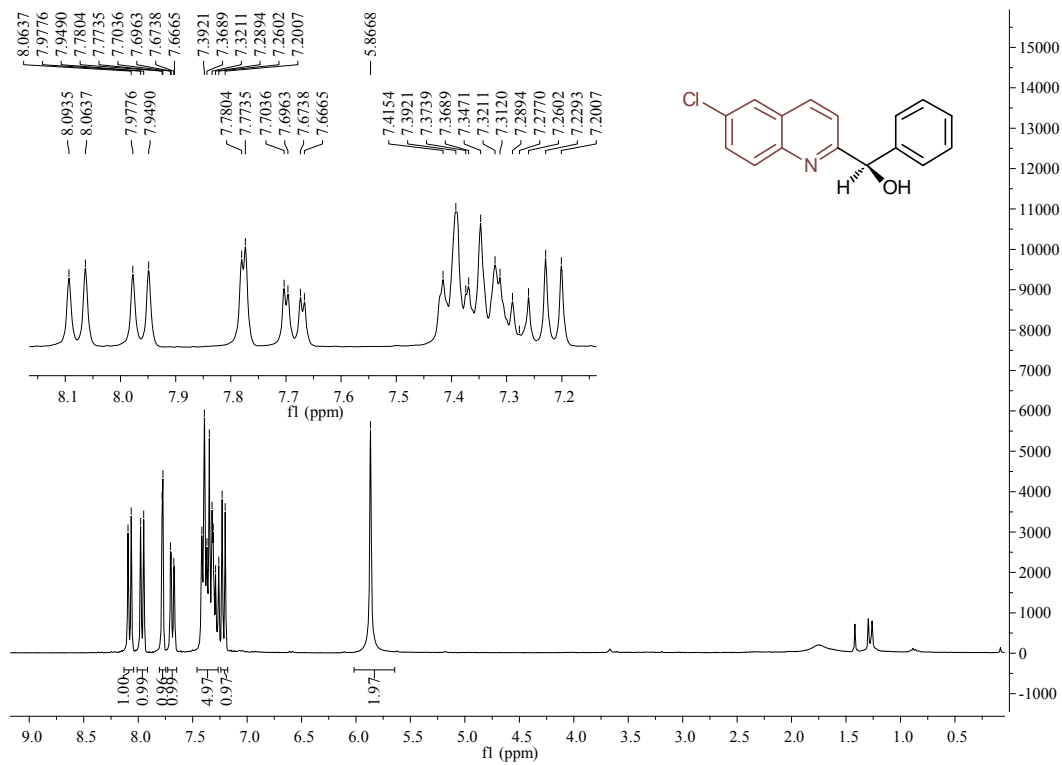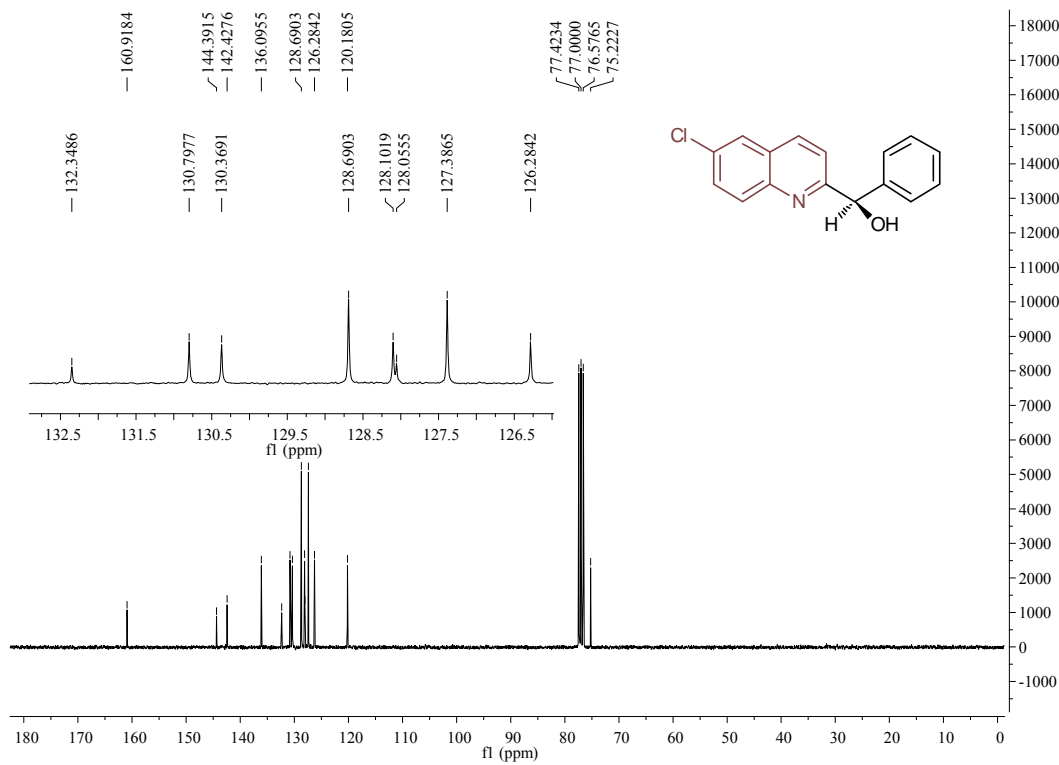

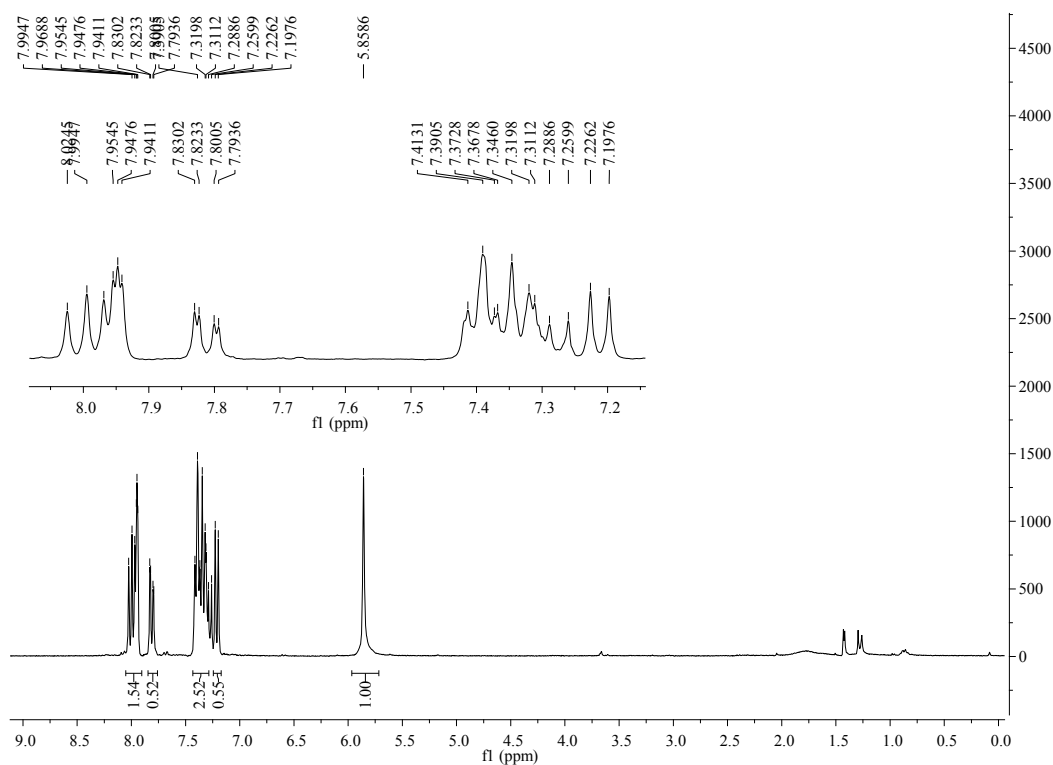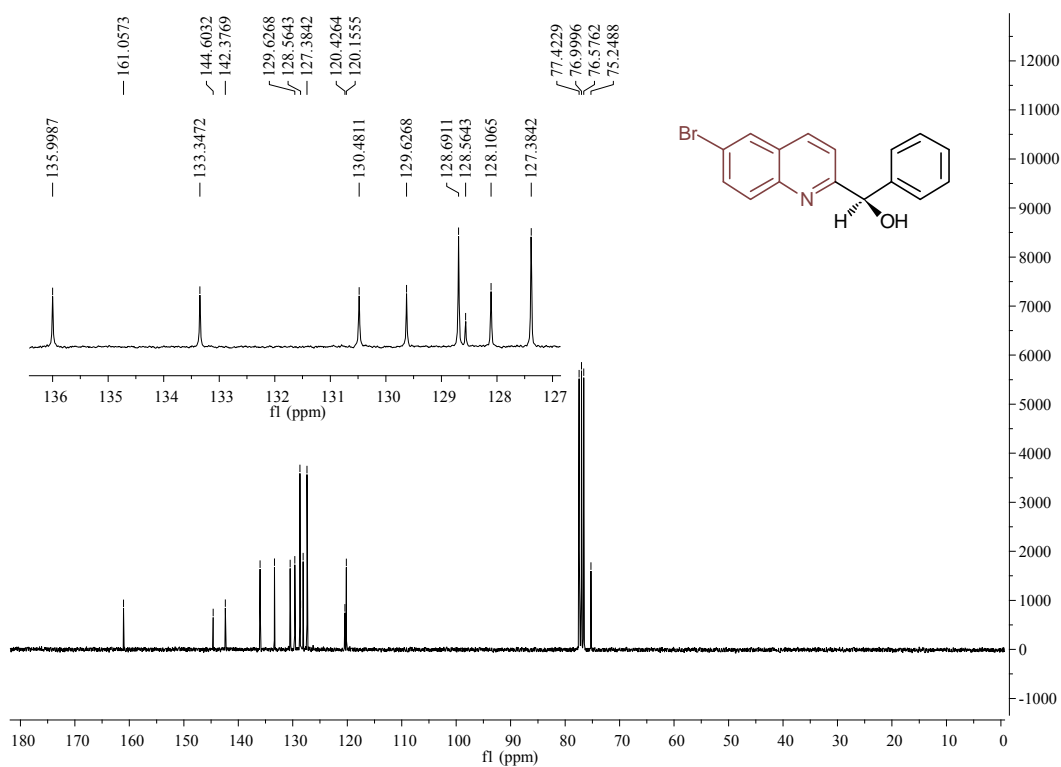

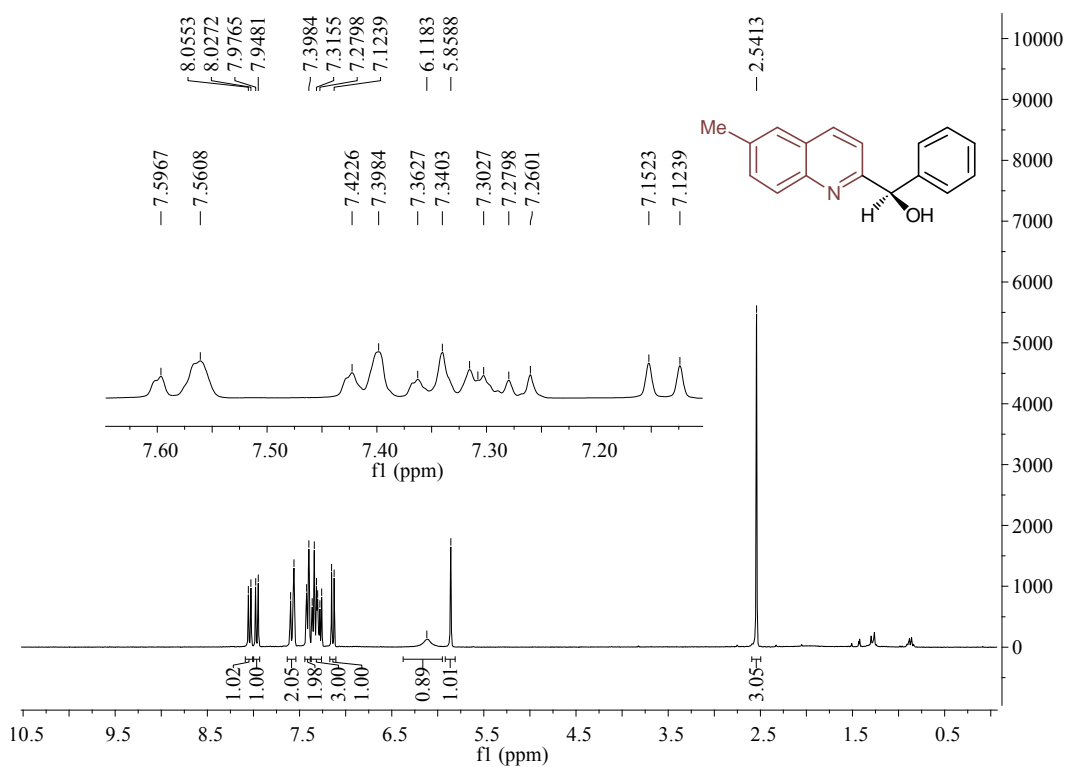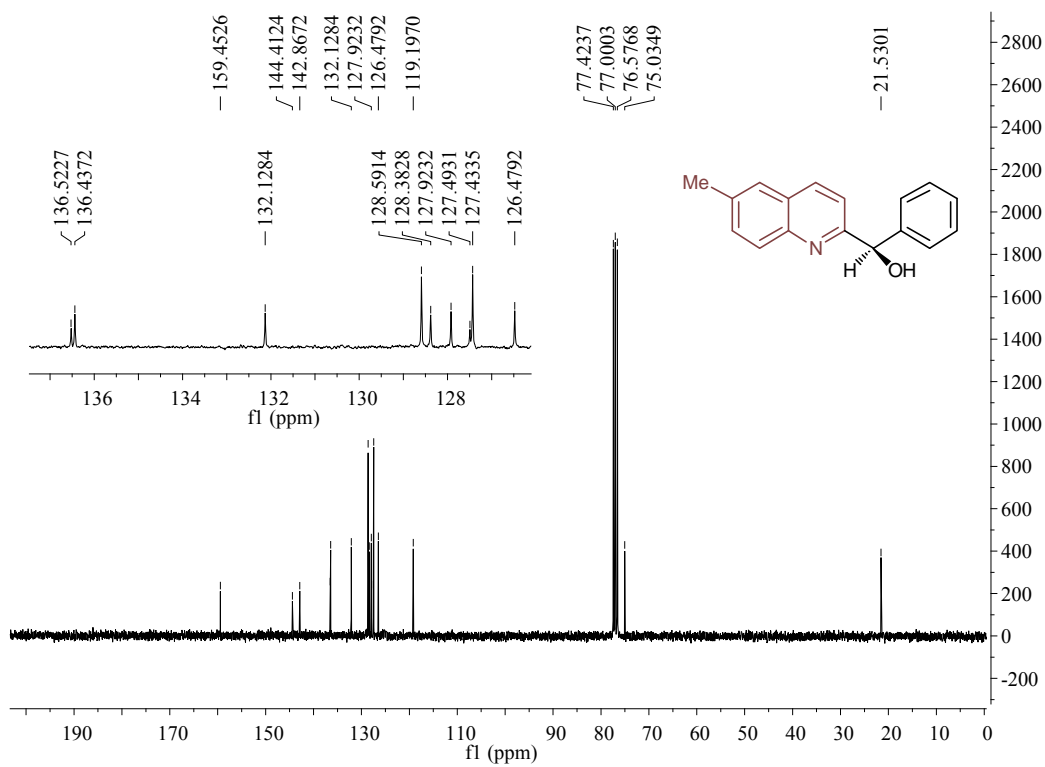



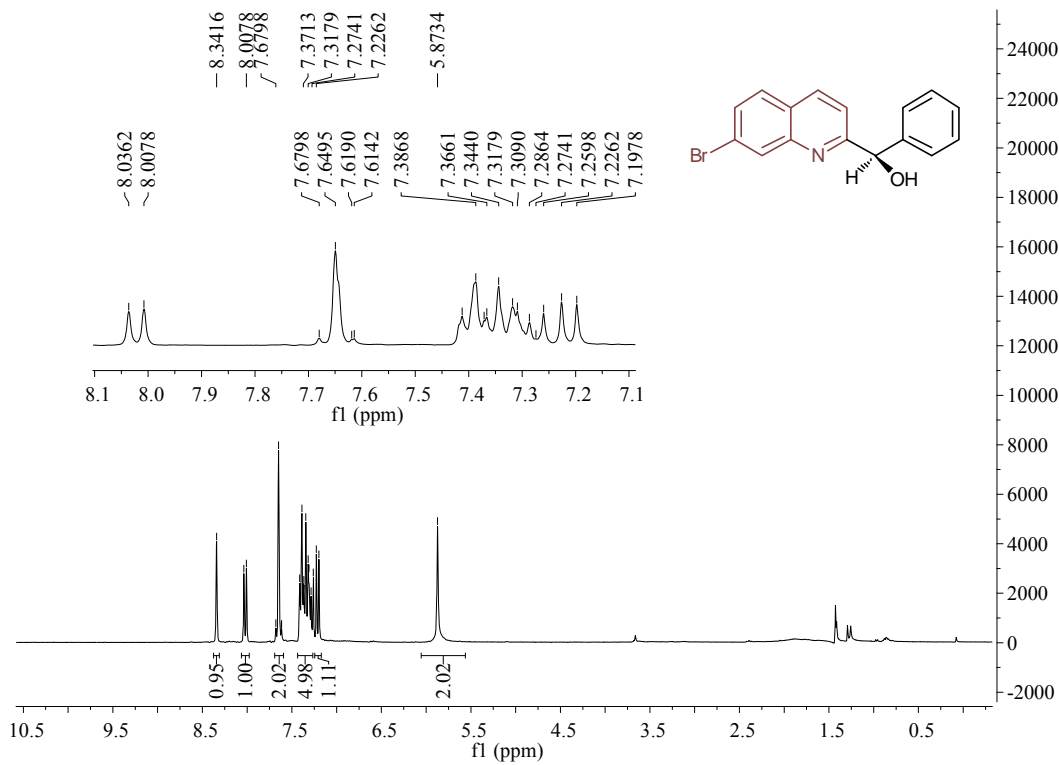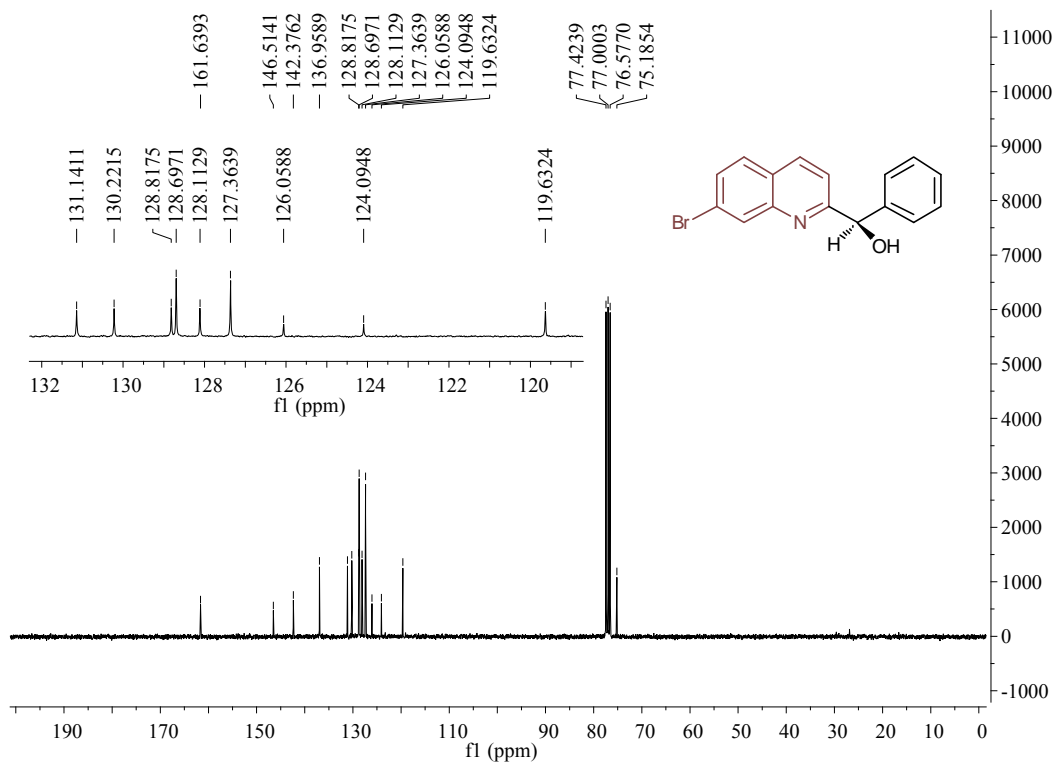

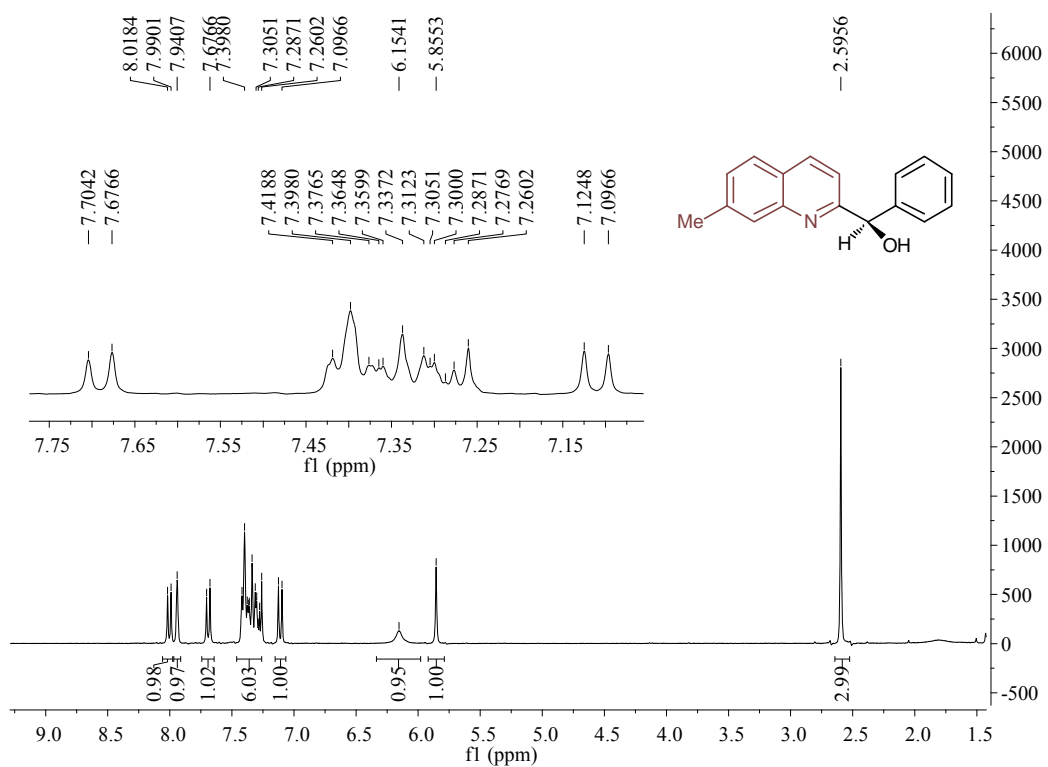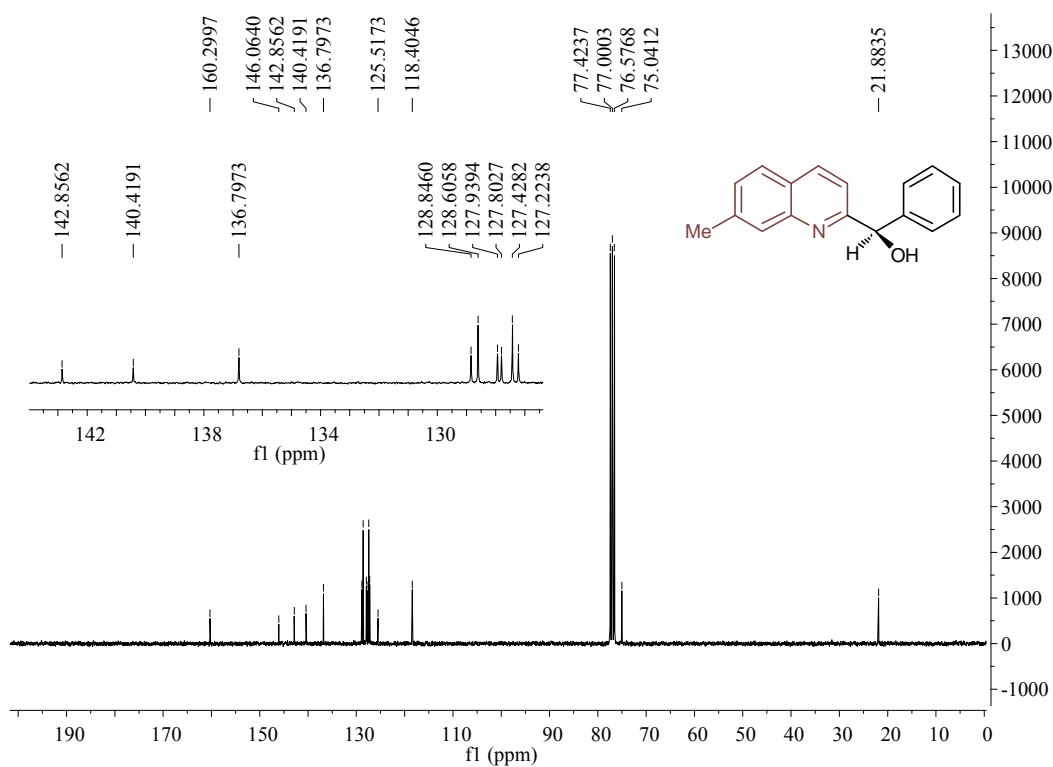

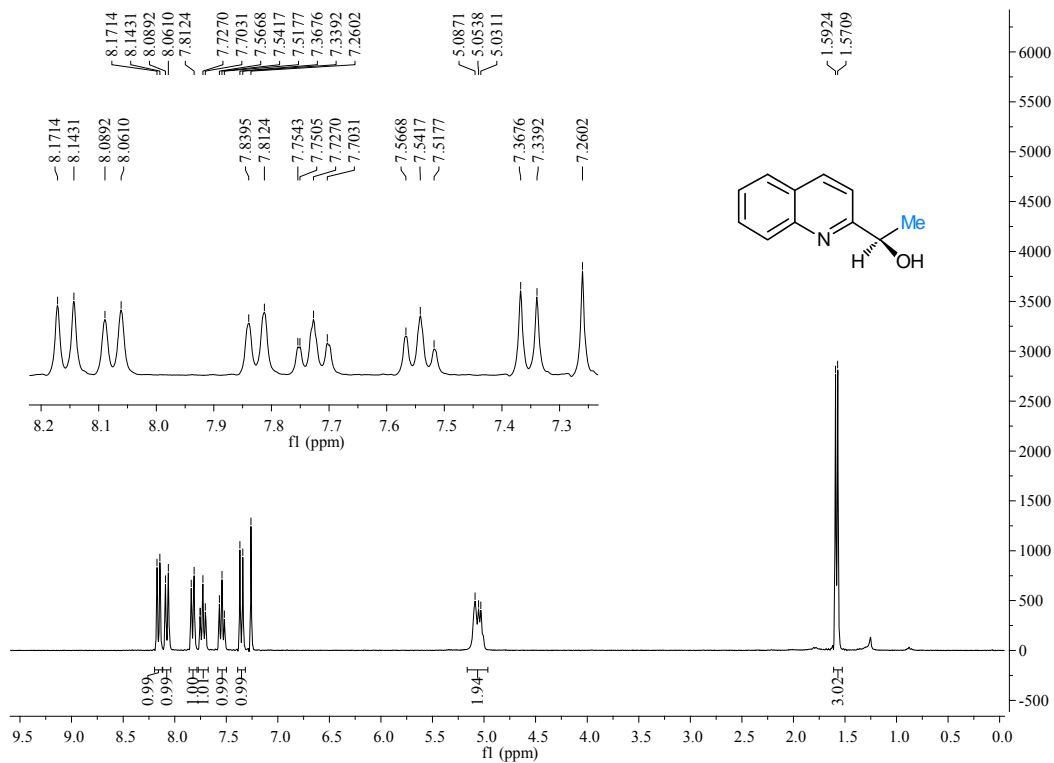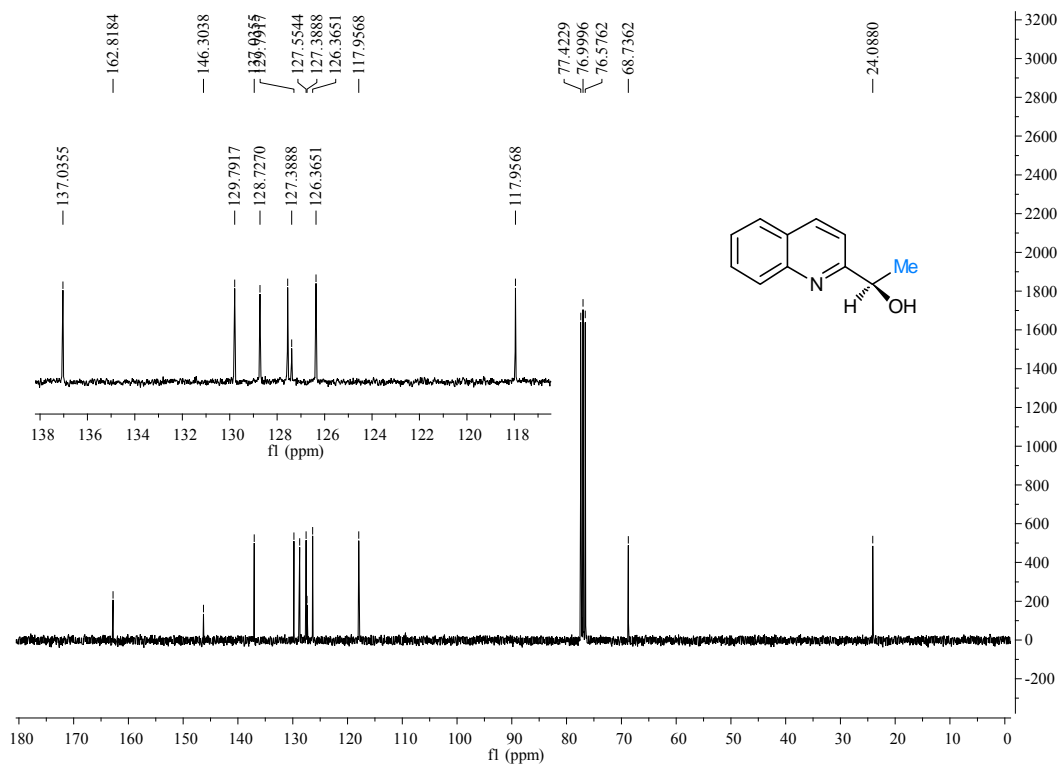

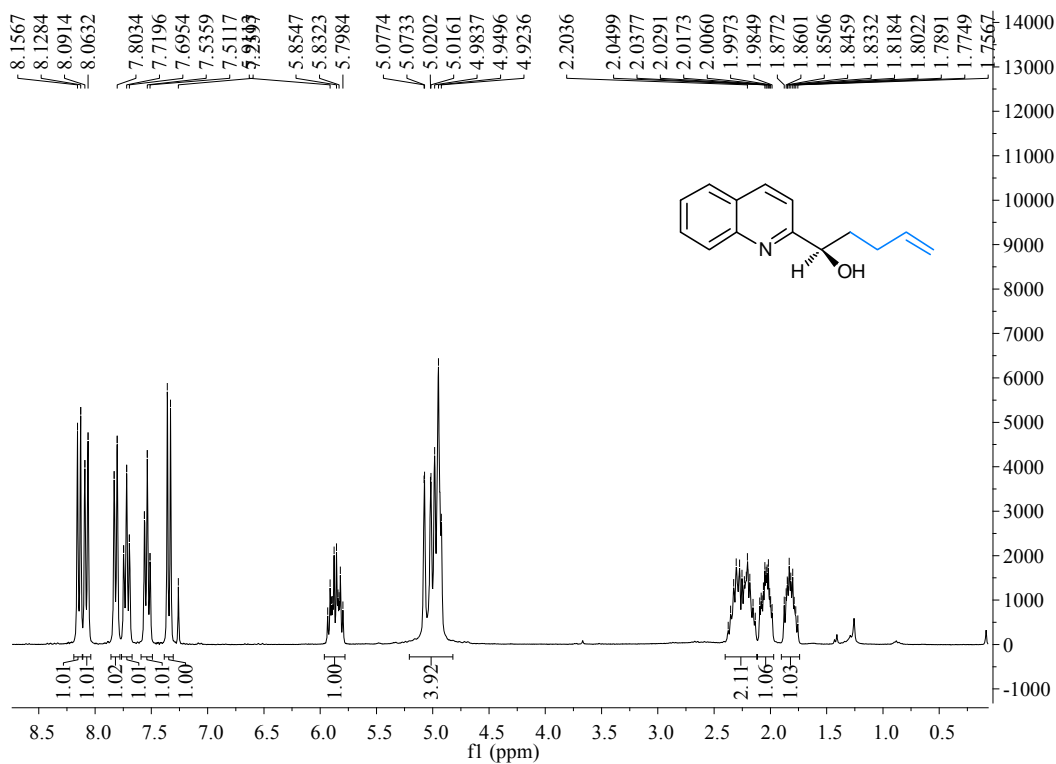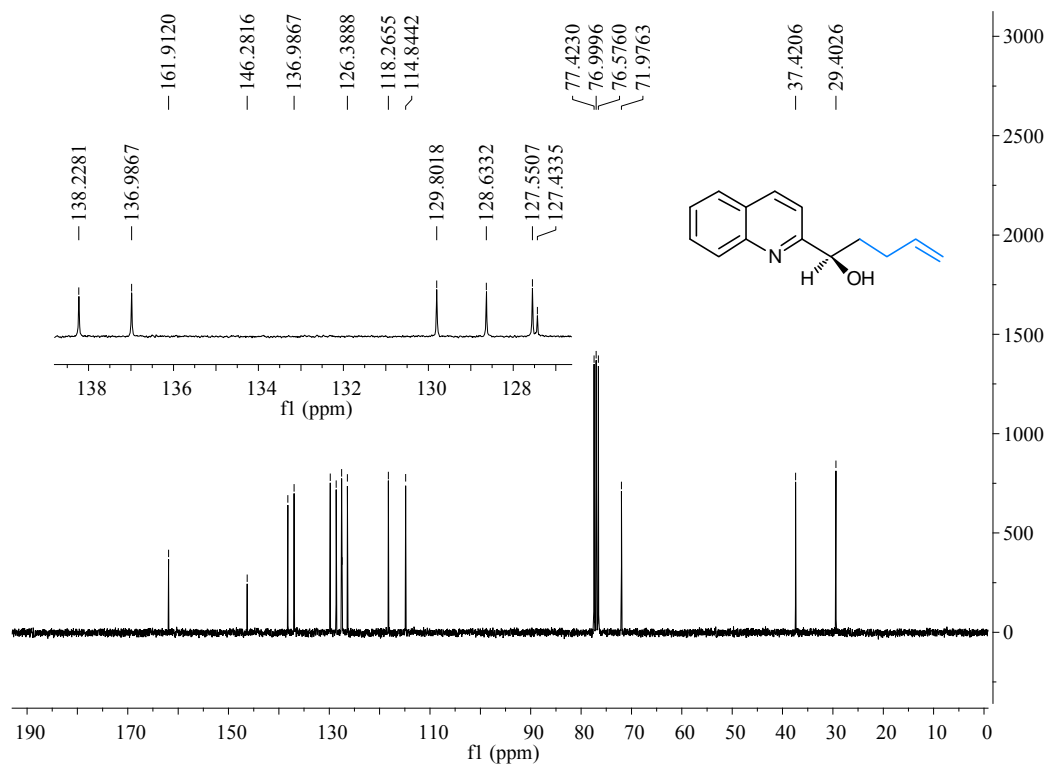

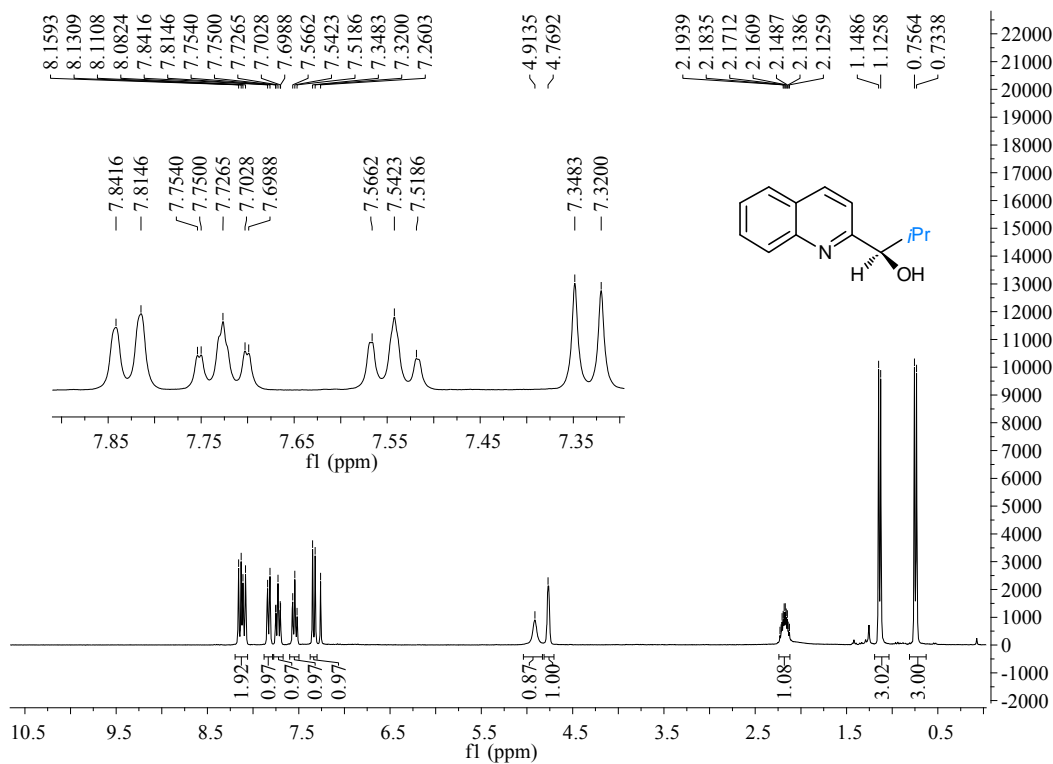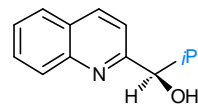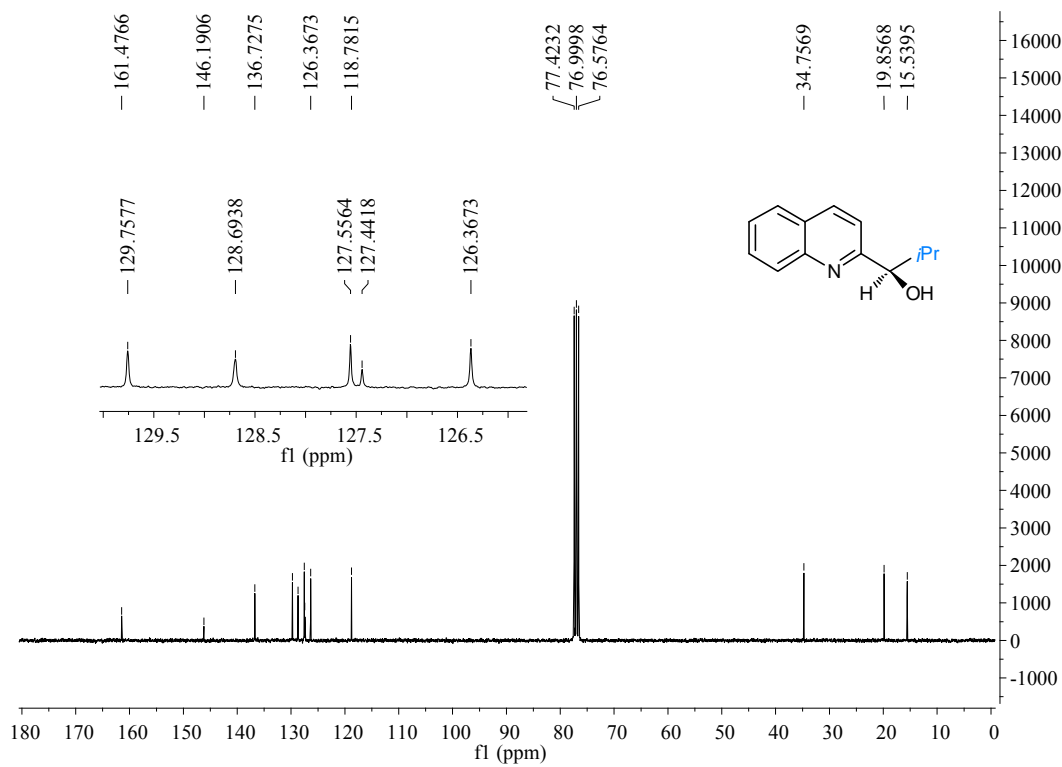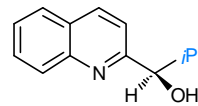

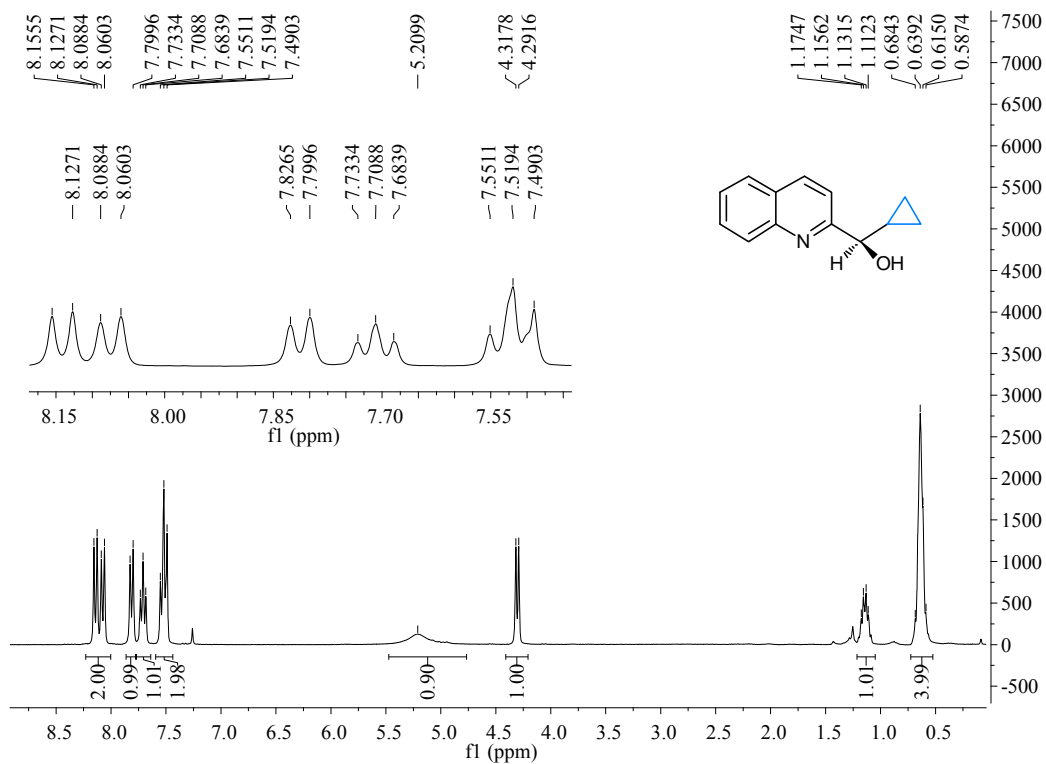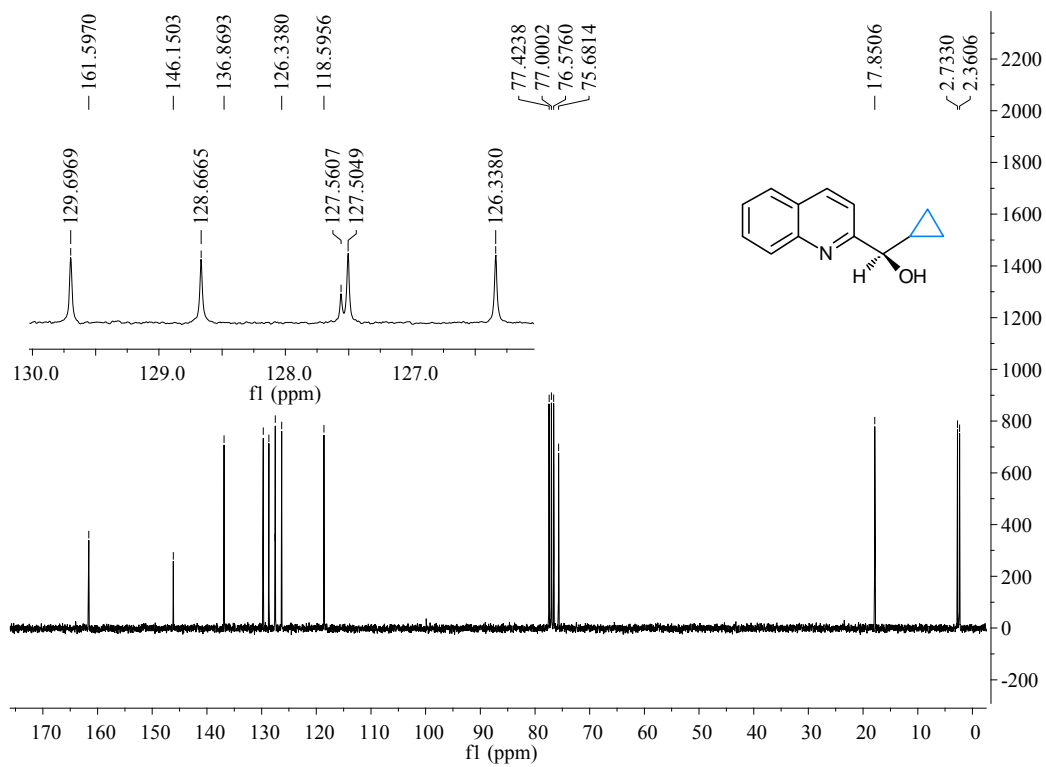

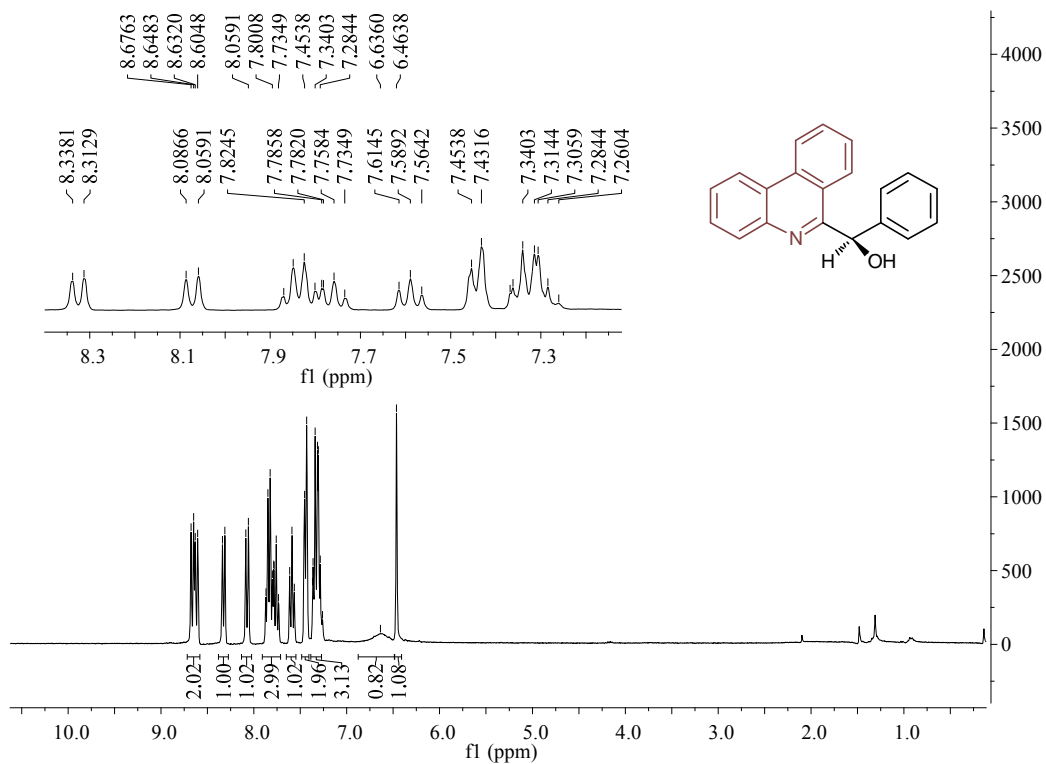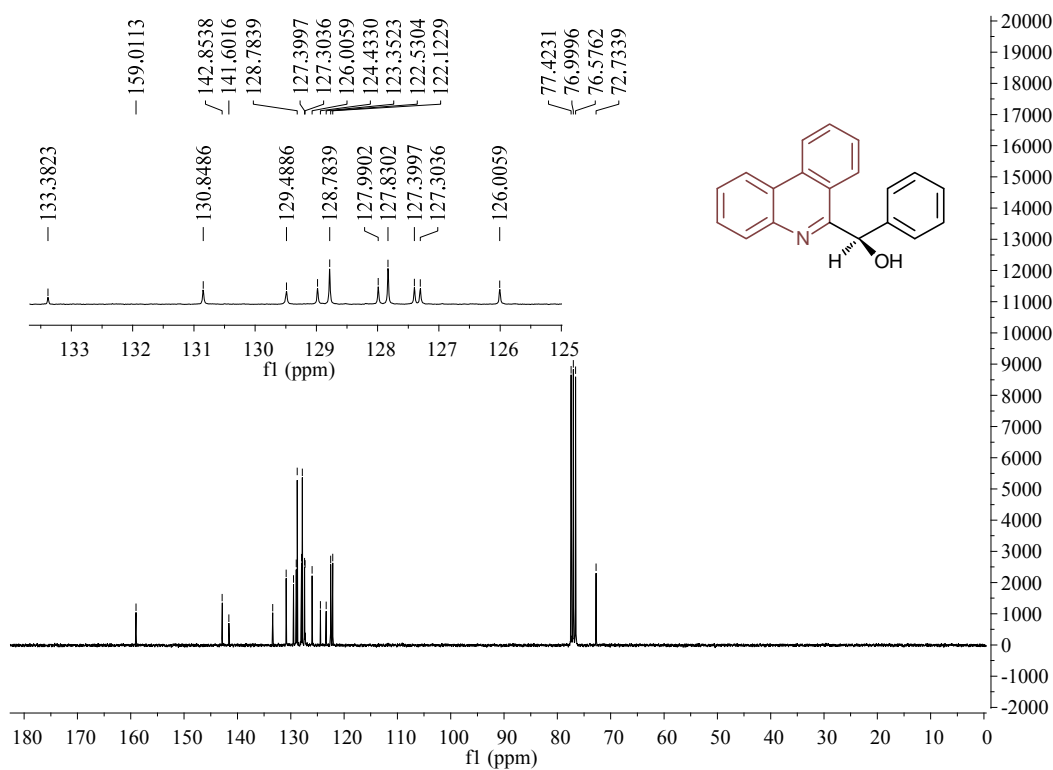

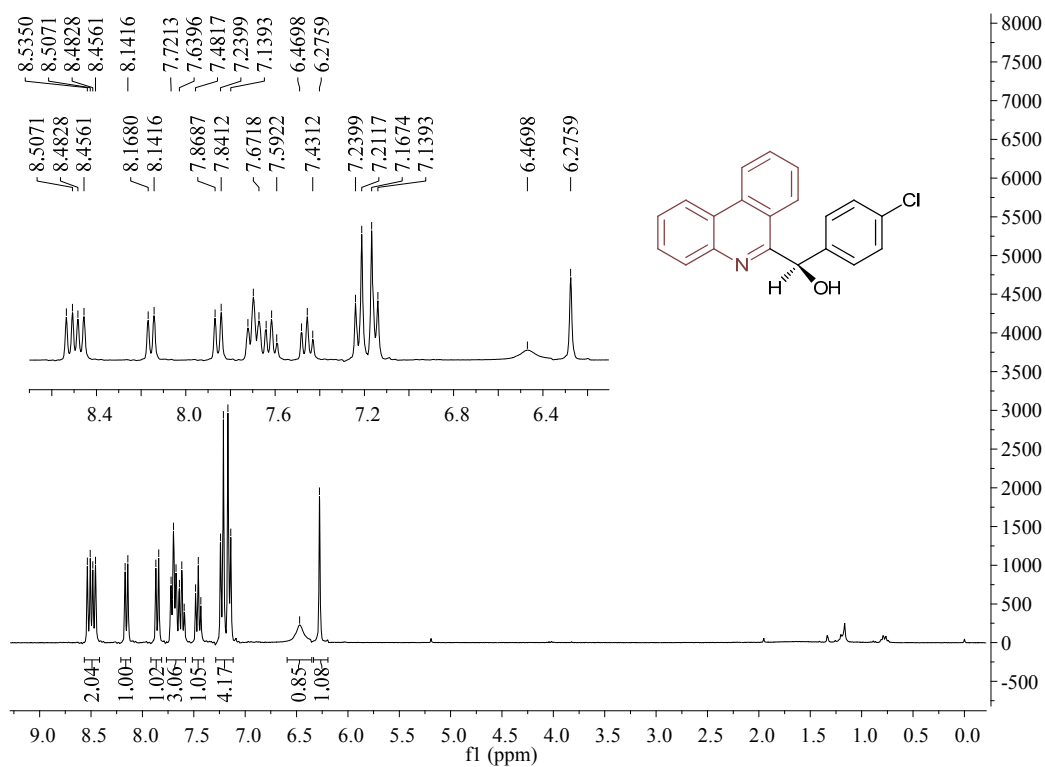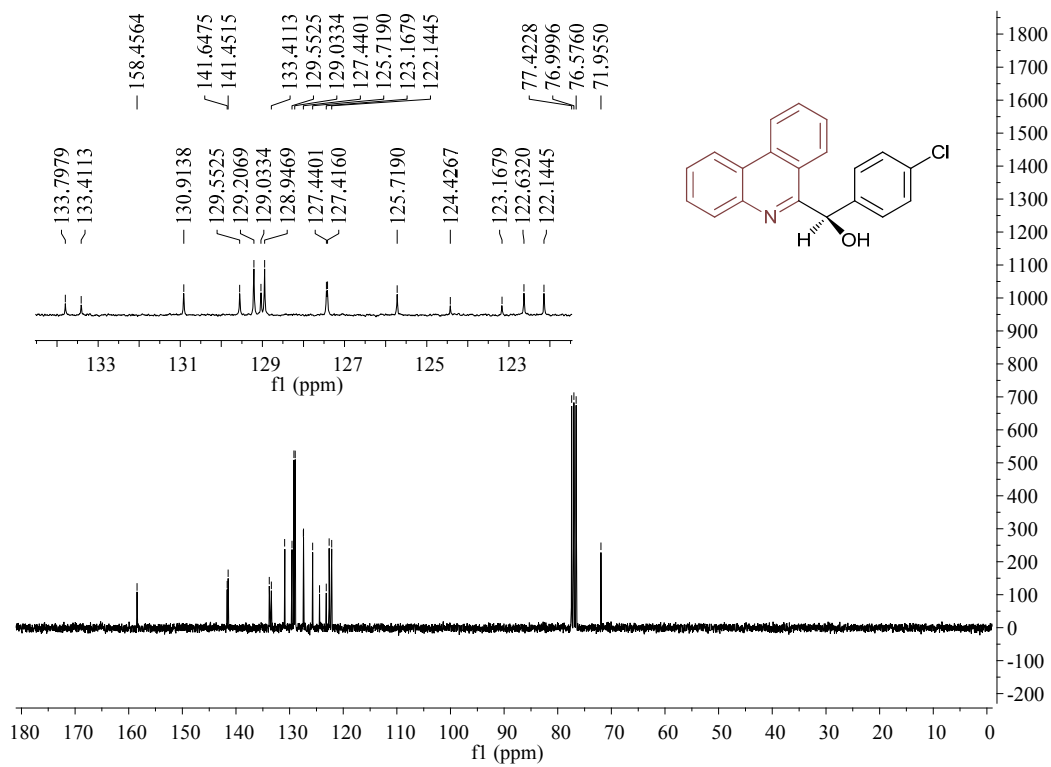



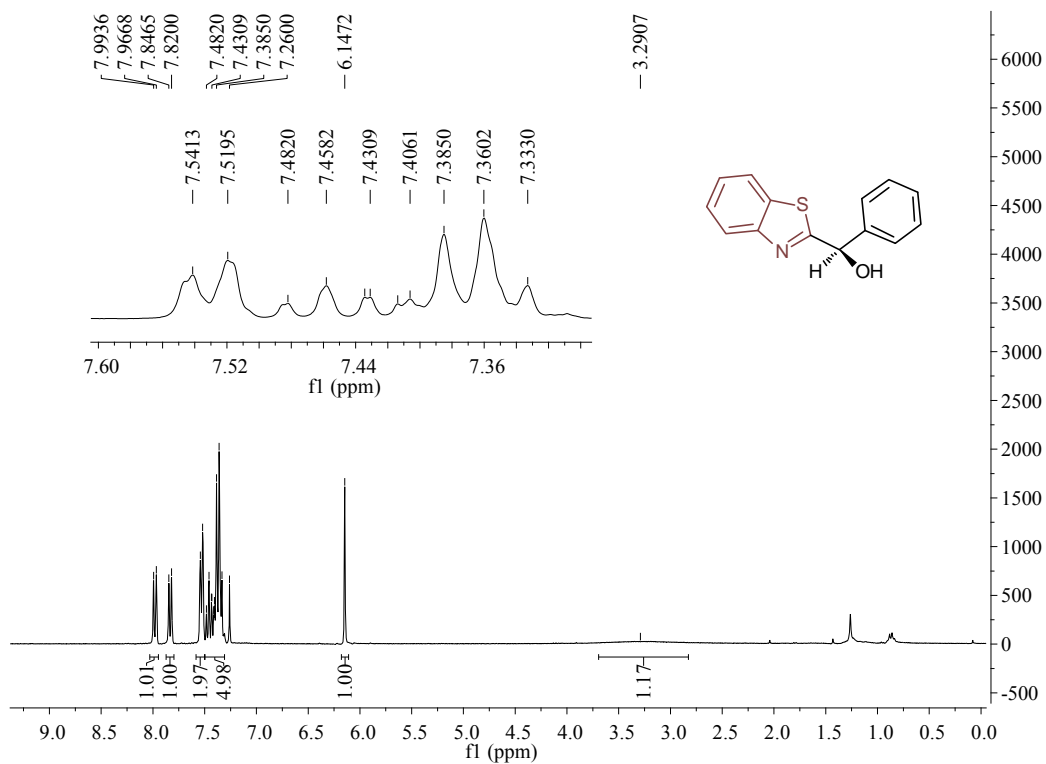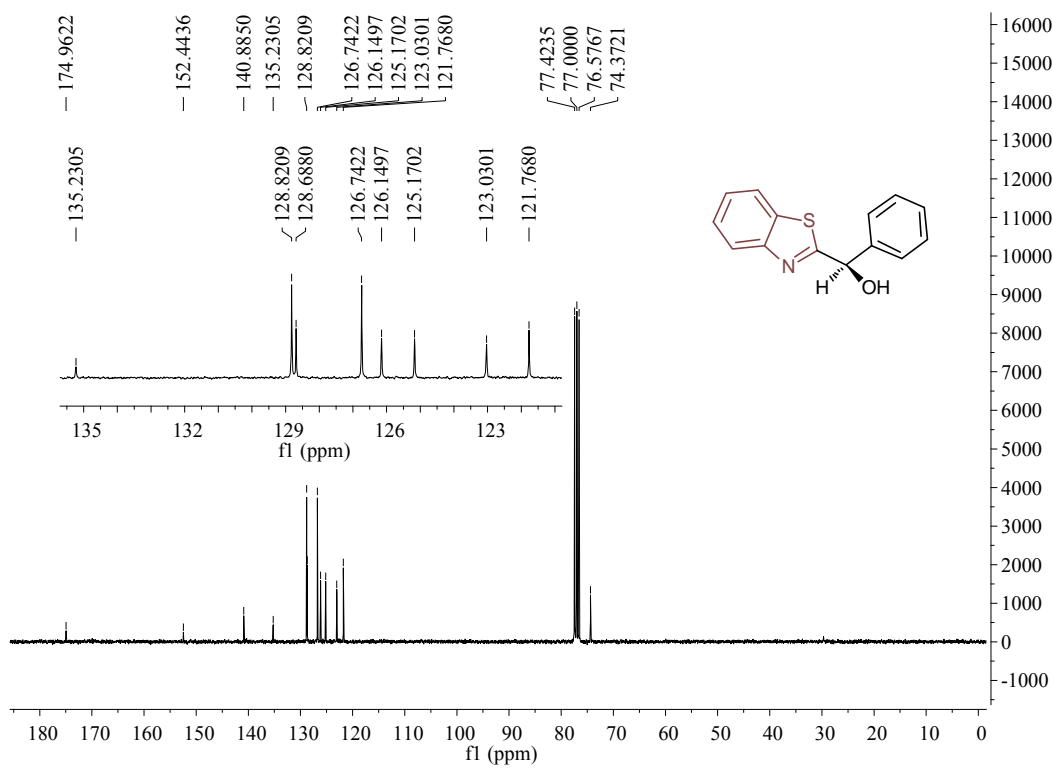

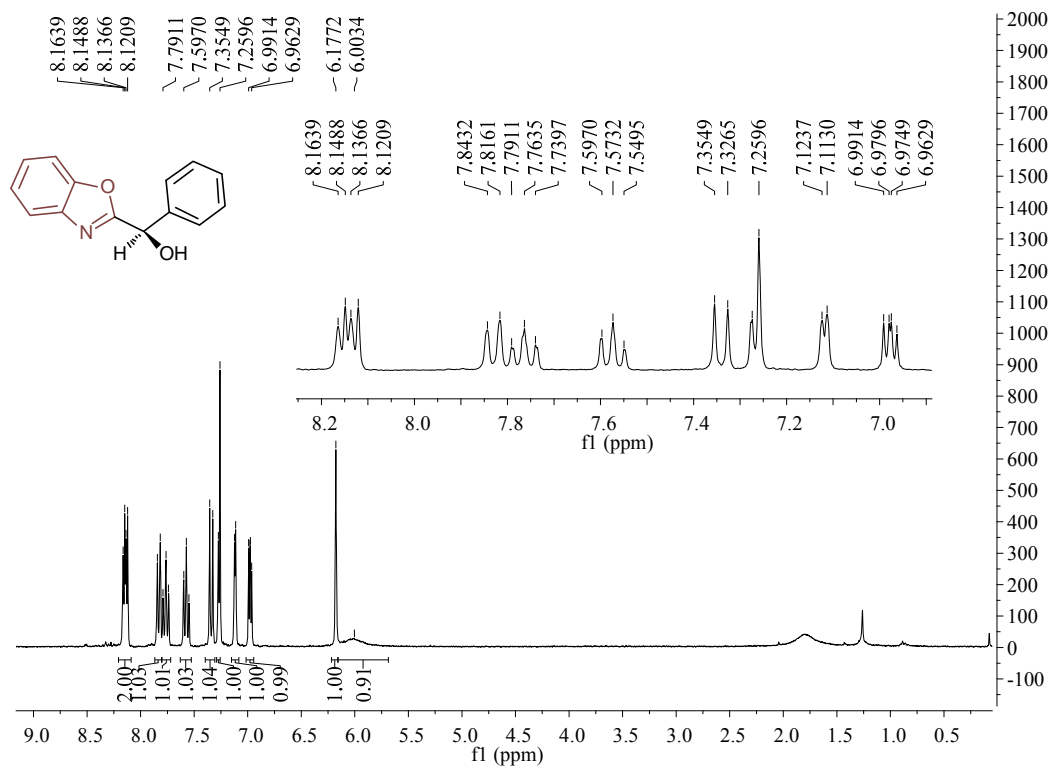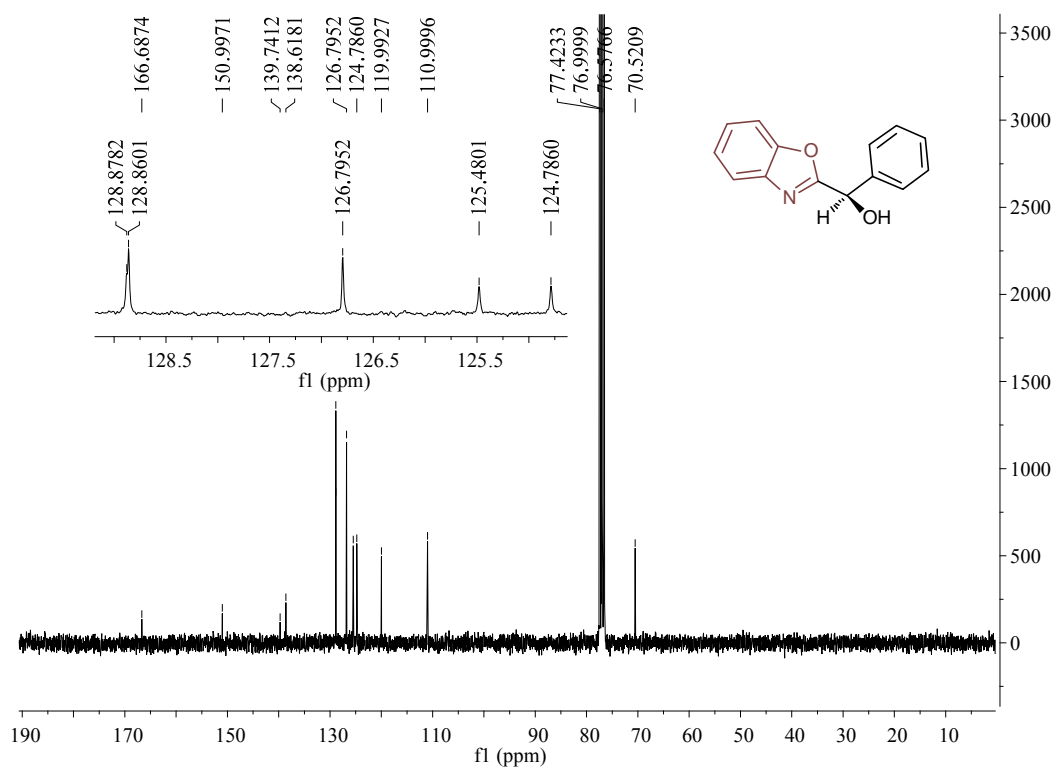

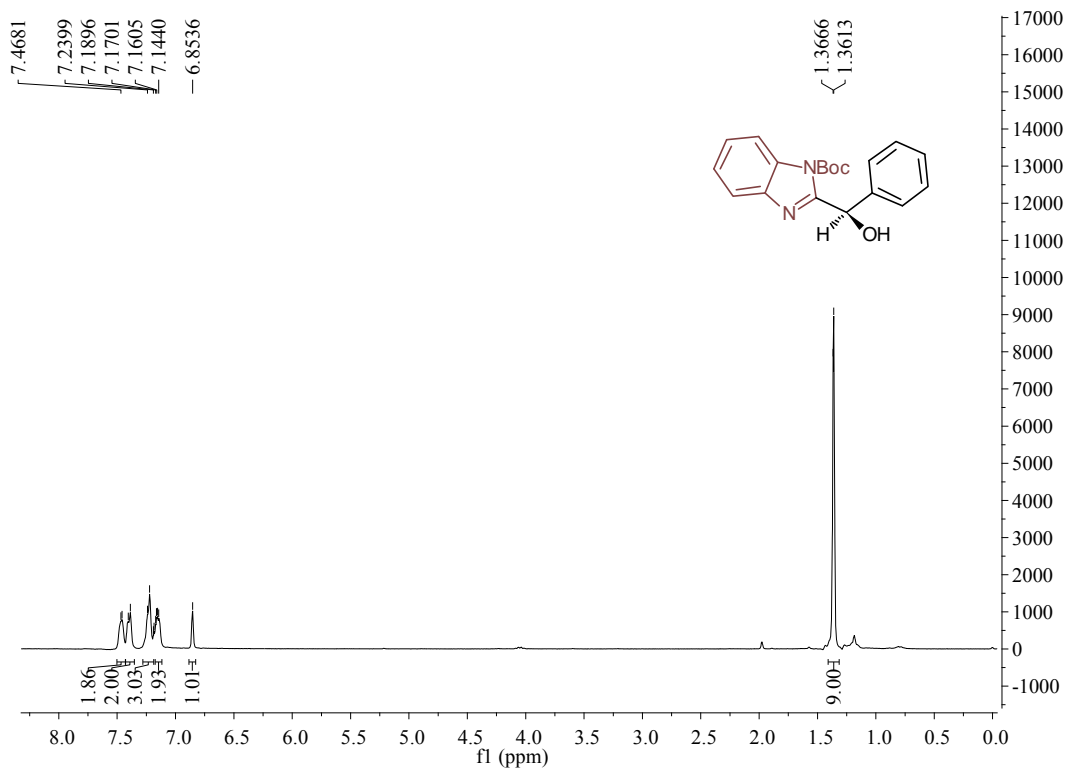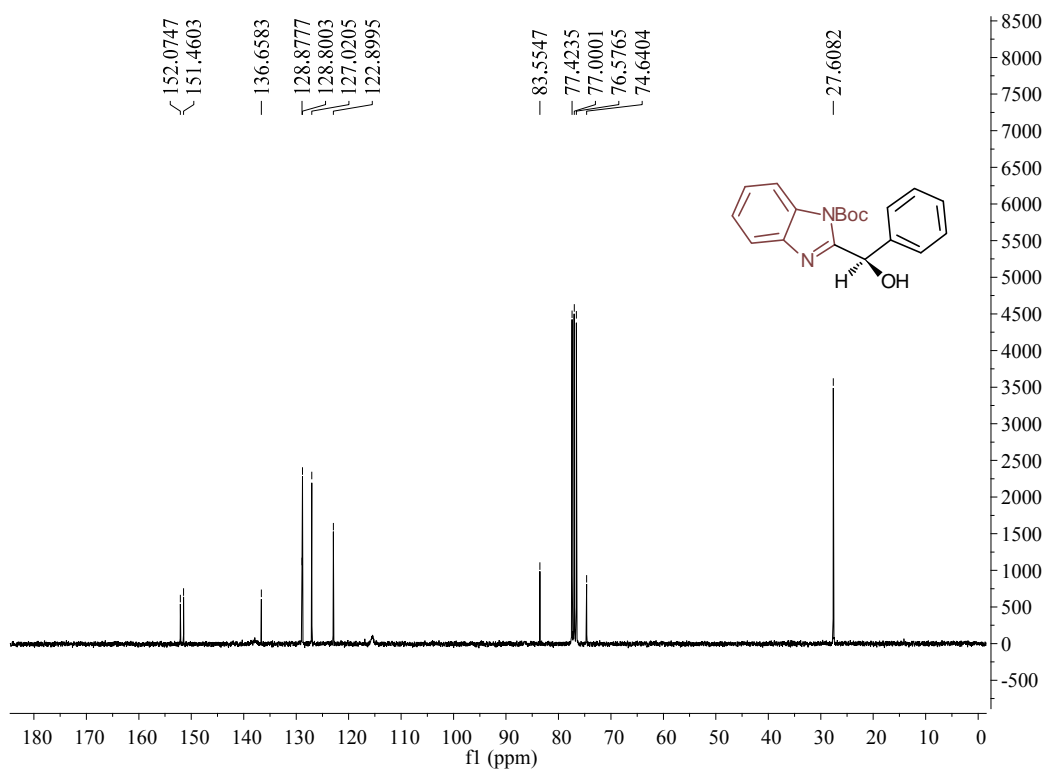

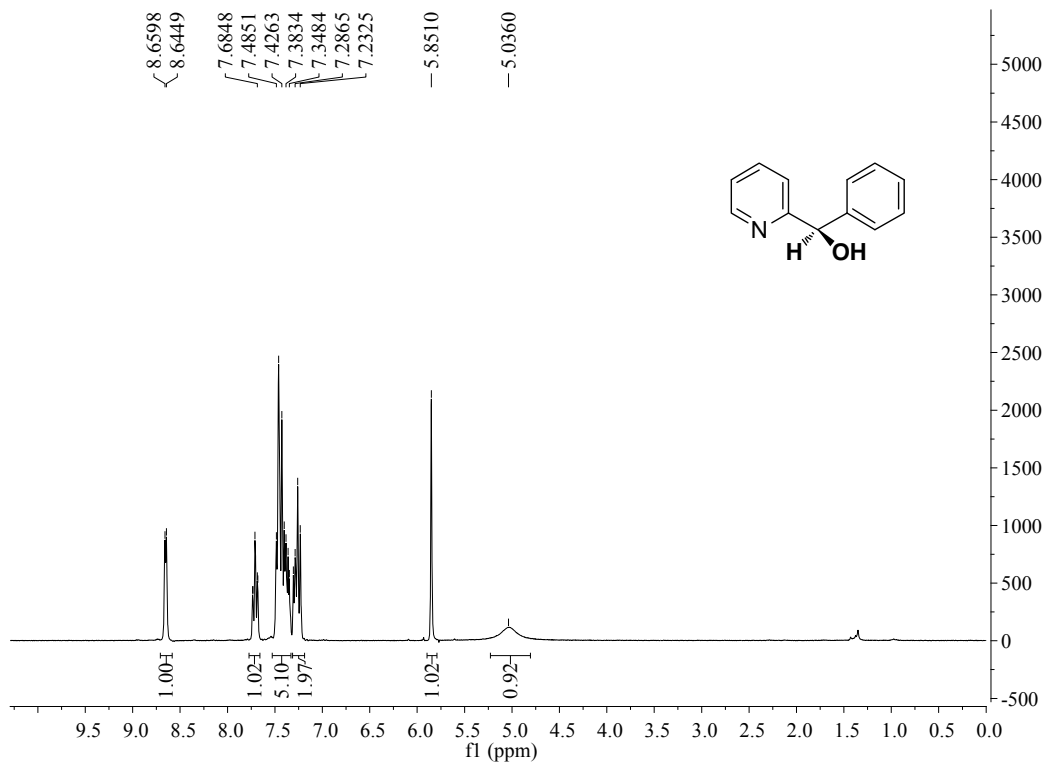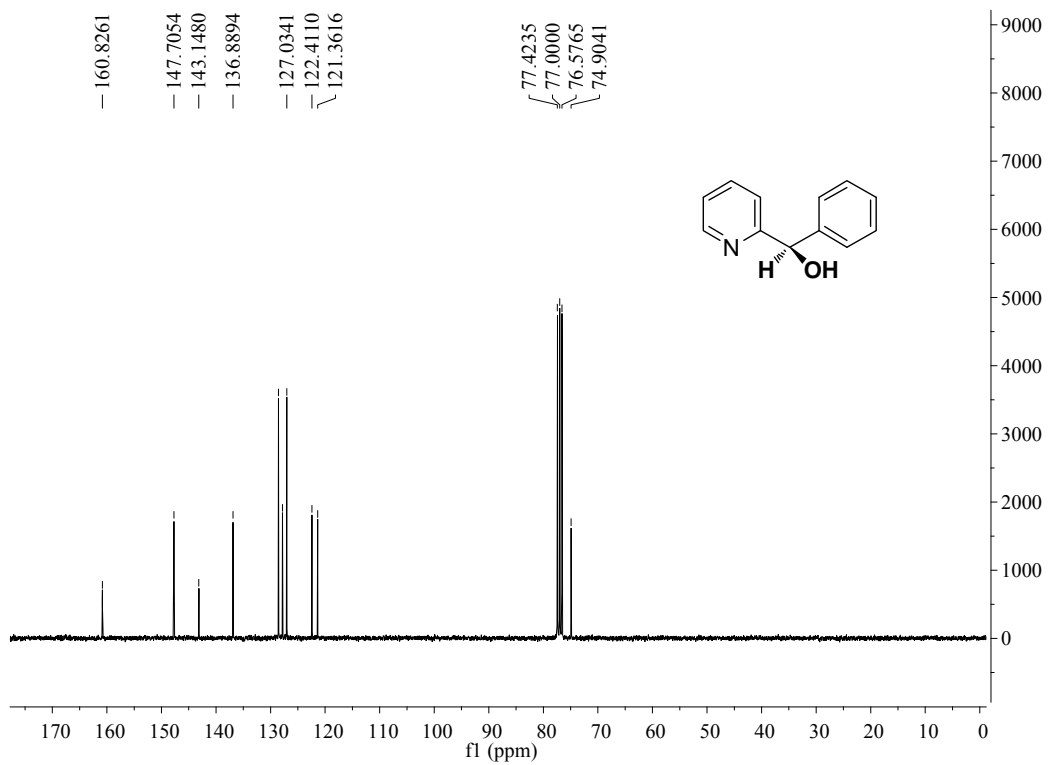

## 8. References

1. (a) S. Sultan, M. A. Rizvi, J. Kumar, B. A. Shah *Chem. Eur. J.* 2018, **24**, 10617; (b) X. Wu, X. Geng, P. Zhao, J. Zhang, X. Gong, Y.-D. Wu, A.-X. Wu *Org. Lett.* 2017, **19**, 1550.
